# Supplementary material for: Efficient synthesis of esermethole and its analogues
Source: Royal Society of Chemistry journal article supplement (doi:10.1039/c1ob05275f), 2011-01-01

## **Spectrum for**

### **Efficient Synthesis of Esermethole and Its Analogues**

Yongyun Zhou, Yuanhong Zhao, Xiaoyong Dai, Jianping Liu, Liang Li and Hongbin Zhang\*

Key Laboratory of Medicinal Chemistry for Natural Resource, Ministry of Education, School of Chemical Science and Technology, Yunnan University, Kunming, Yunnan 650091, P. R. China Fax: 86-871-5035538. E-mail: zhanghb@ynu.edu.cn or zhang\_hongbin@hotmail.com

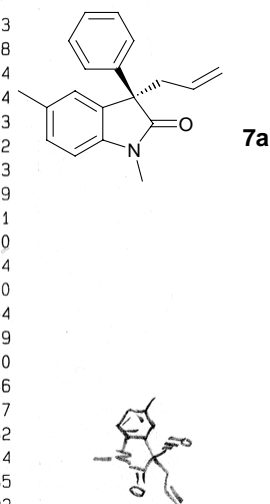

| Current Data Parameters     |                 |     |
|-----------------------------|-----------------|-----|
| NAME                        | xyy             | zzy |
| EXPNO                       | 610             |     |
| PROCNO                      | 1               |     |
| F2 - Acquisition Parameters |                 |     |
| Date_                       | 20090205        |     |
| Time                        | 13.17           |     |
| INSTRUM                     | av300           |     |
| PROBHD                      | 5 mm QNP 1H/13  |     |
| PULPROG                     | zgpg30          |     |
| TD                          | 65536           |     |
| SOLVENT                     | CDCl3           |     |
| NS                          | 16              |     |
| DS                          | 1               |     |
| SWH                         | 4789.272 Hz     |     |
| FIDRES                      | 0.073078 Hz     |     |
| AQ                          | 6.8420086 sec   |     |
| RG                          | 181             |     |
| DM                          | 104.400 usec    |     |
| DE                          | 6.00 usec       |     |
| TE                          | 295.9 K         |     |
| D1                          | 1.00000000 sec  |     |
| MCREST                      | 0.00000000 sec  |     |
| MCNMR                       | 0.01500000 sec  |     |
| ===== CHANNEL f1 =====      |                 |     |
| NULC1                       | 1H              |     |
| P1                          | 8.60 usec       |     |
| PL1                         | -2.00 dB        |     |
| SFO1                        | 300.1321009 MHz |     |
| F2 - Processing parameters  |                 |     |
| SI                          | 32768           |     |
| SF                          | 300.1300189 MHz |     |
| WDW                         | EM              |     |
| SSB                         | 0               |     |
| B                           | 0.30 Hz         |     |
| GB                          | 0               |     |
| PC                          | 1.00            |     |
| 10 NMR plot parameters      |                 |     |
| CX                          | 23.00 cm        |     |
| CY                          | 12.50 cm        |     |
| F1P                         | 8.329 ppm       |     |
| F1                          | 2499.78 Hz      |     |
| F2P                         | 0.703 ppm       |     |
| F2                          | 211.05 Hz       |     |
| PPHMM                       | 0.33156 ppm/cm  |     |
| HZCM                        | 99.51002 Hz/cm  |     |

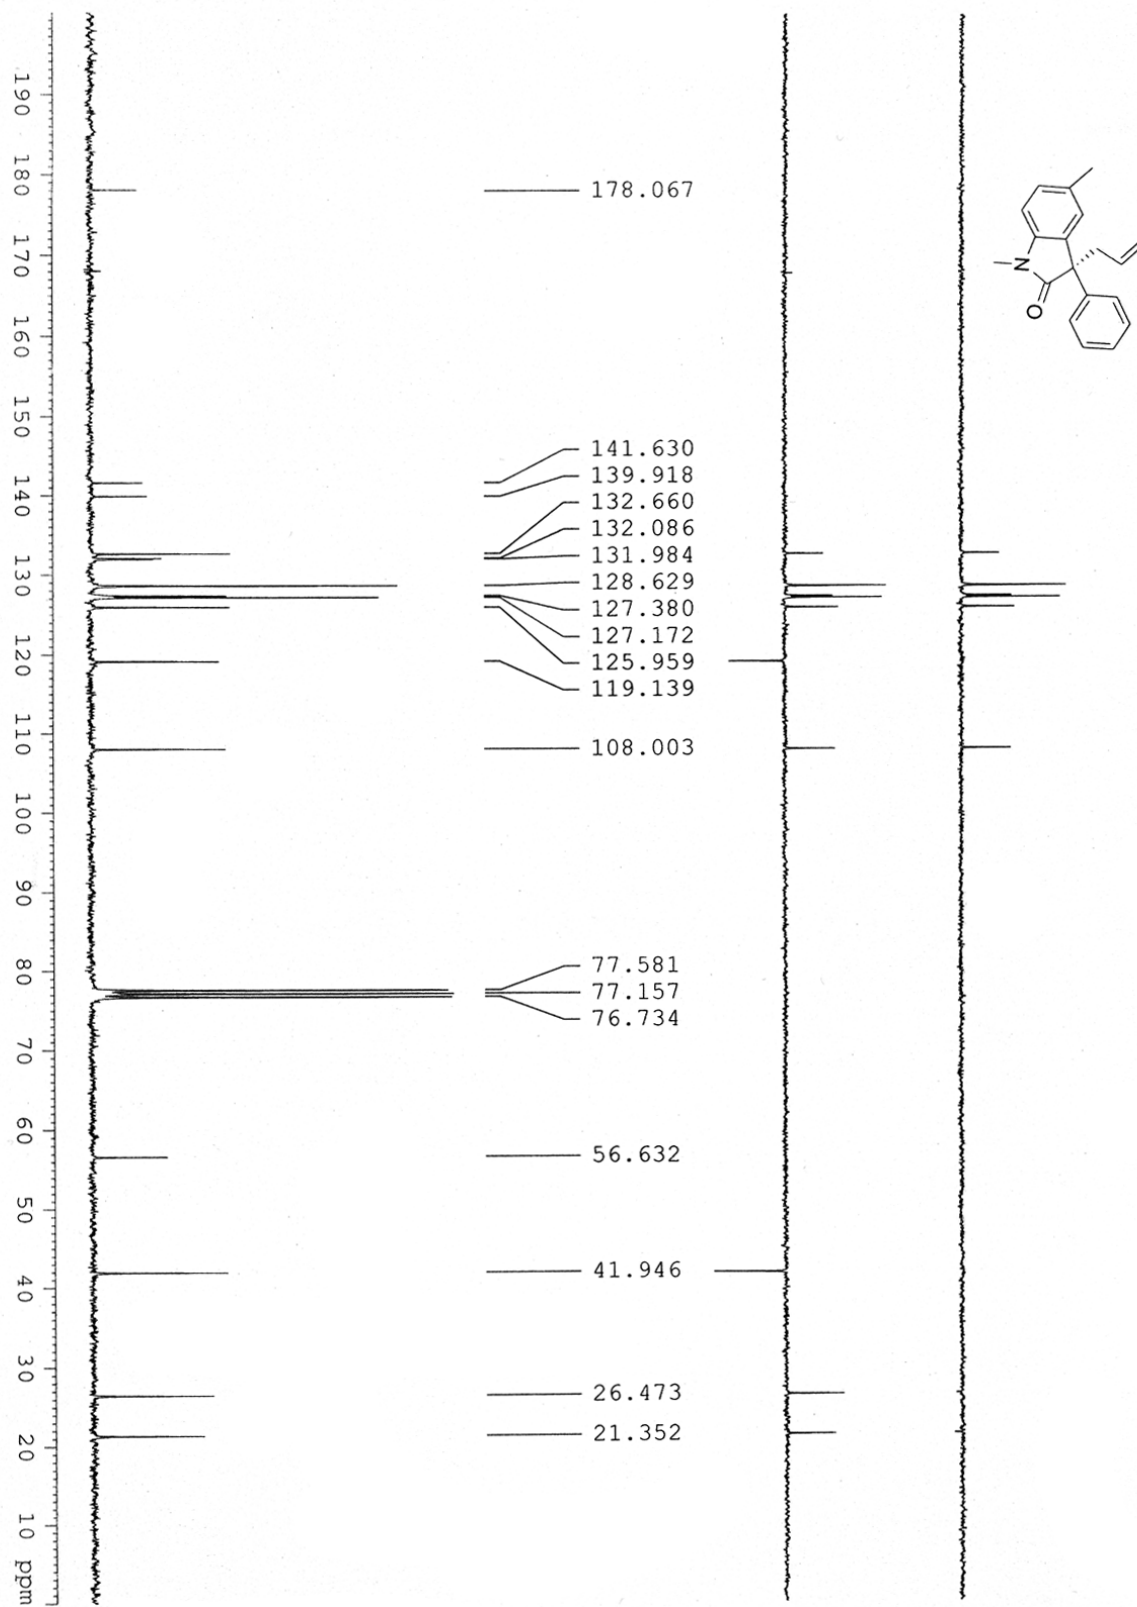

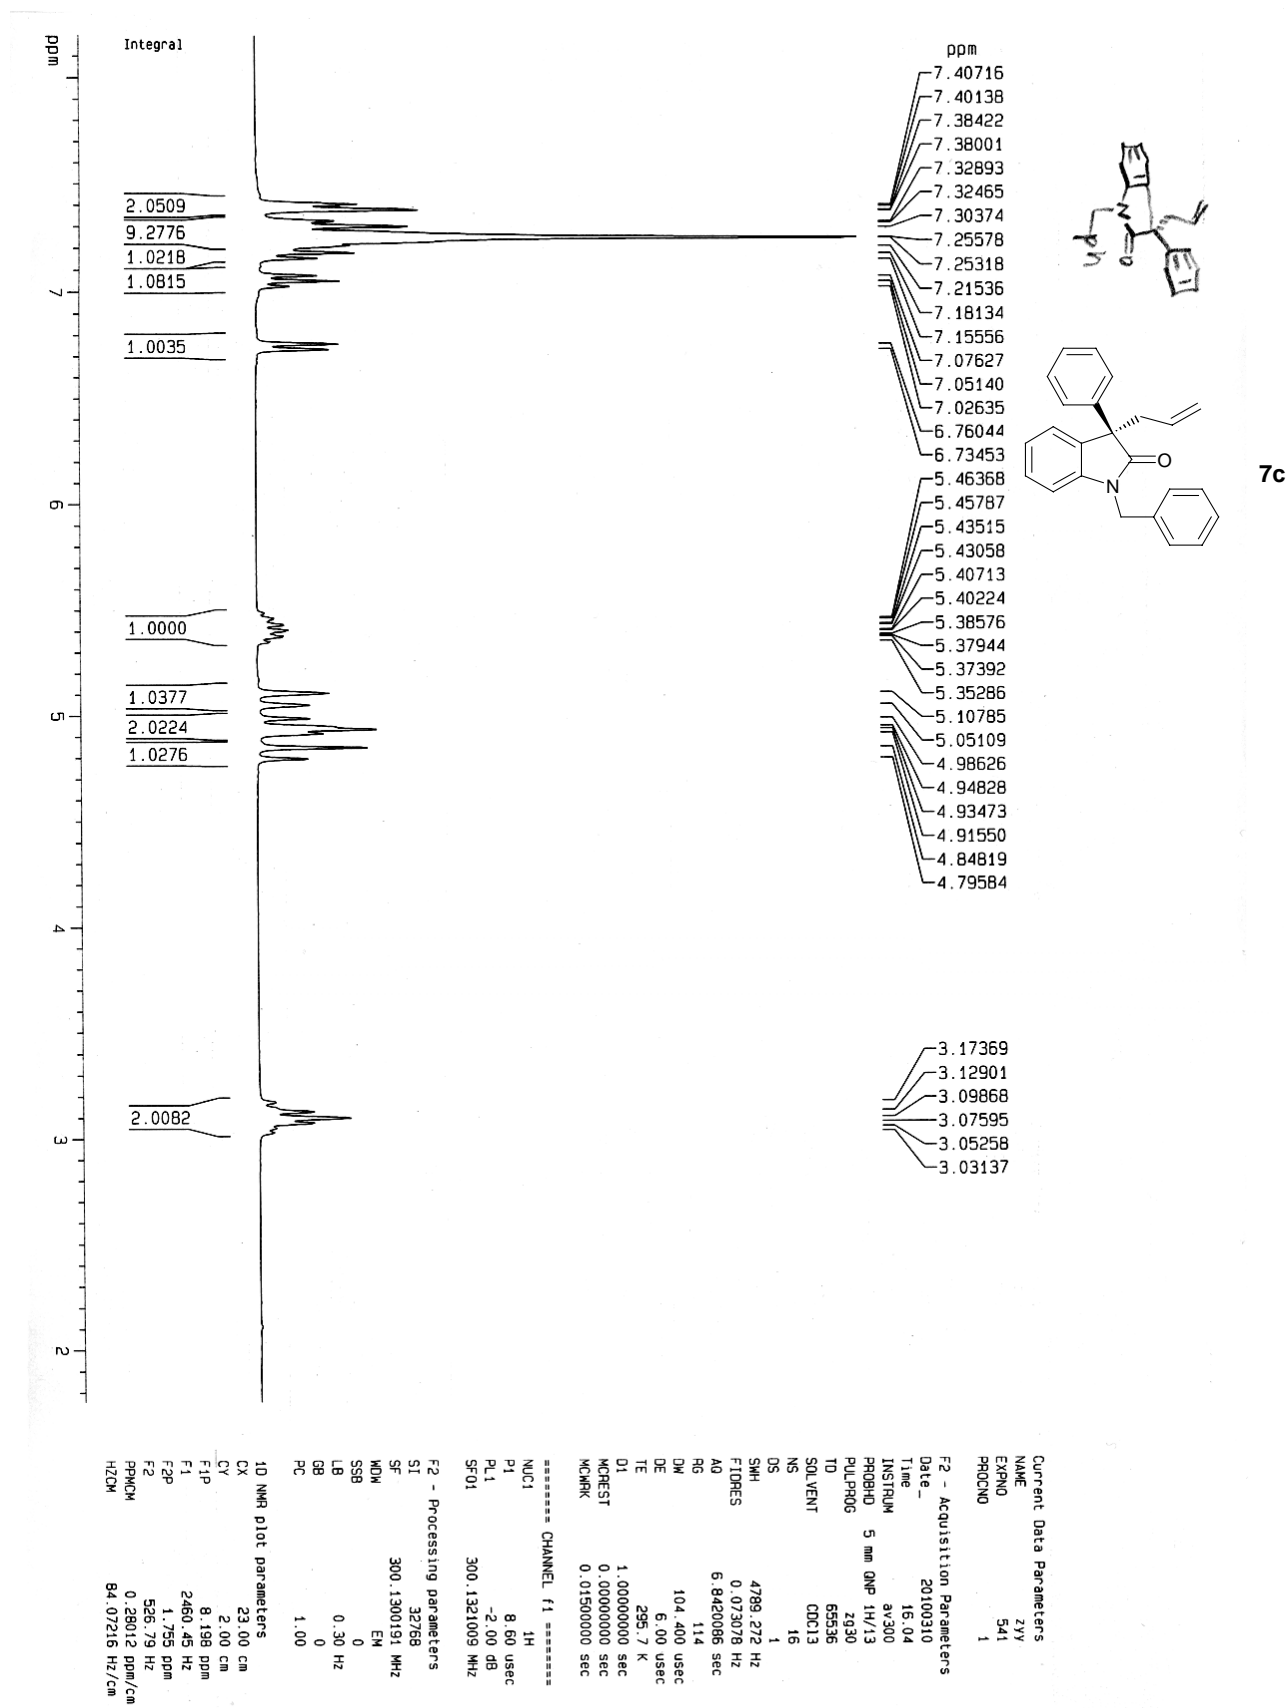



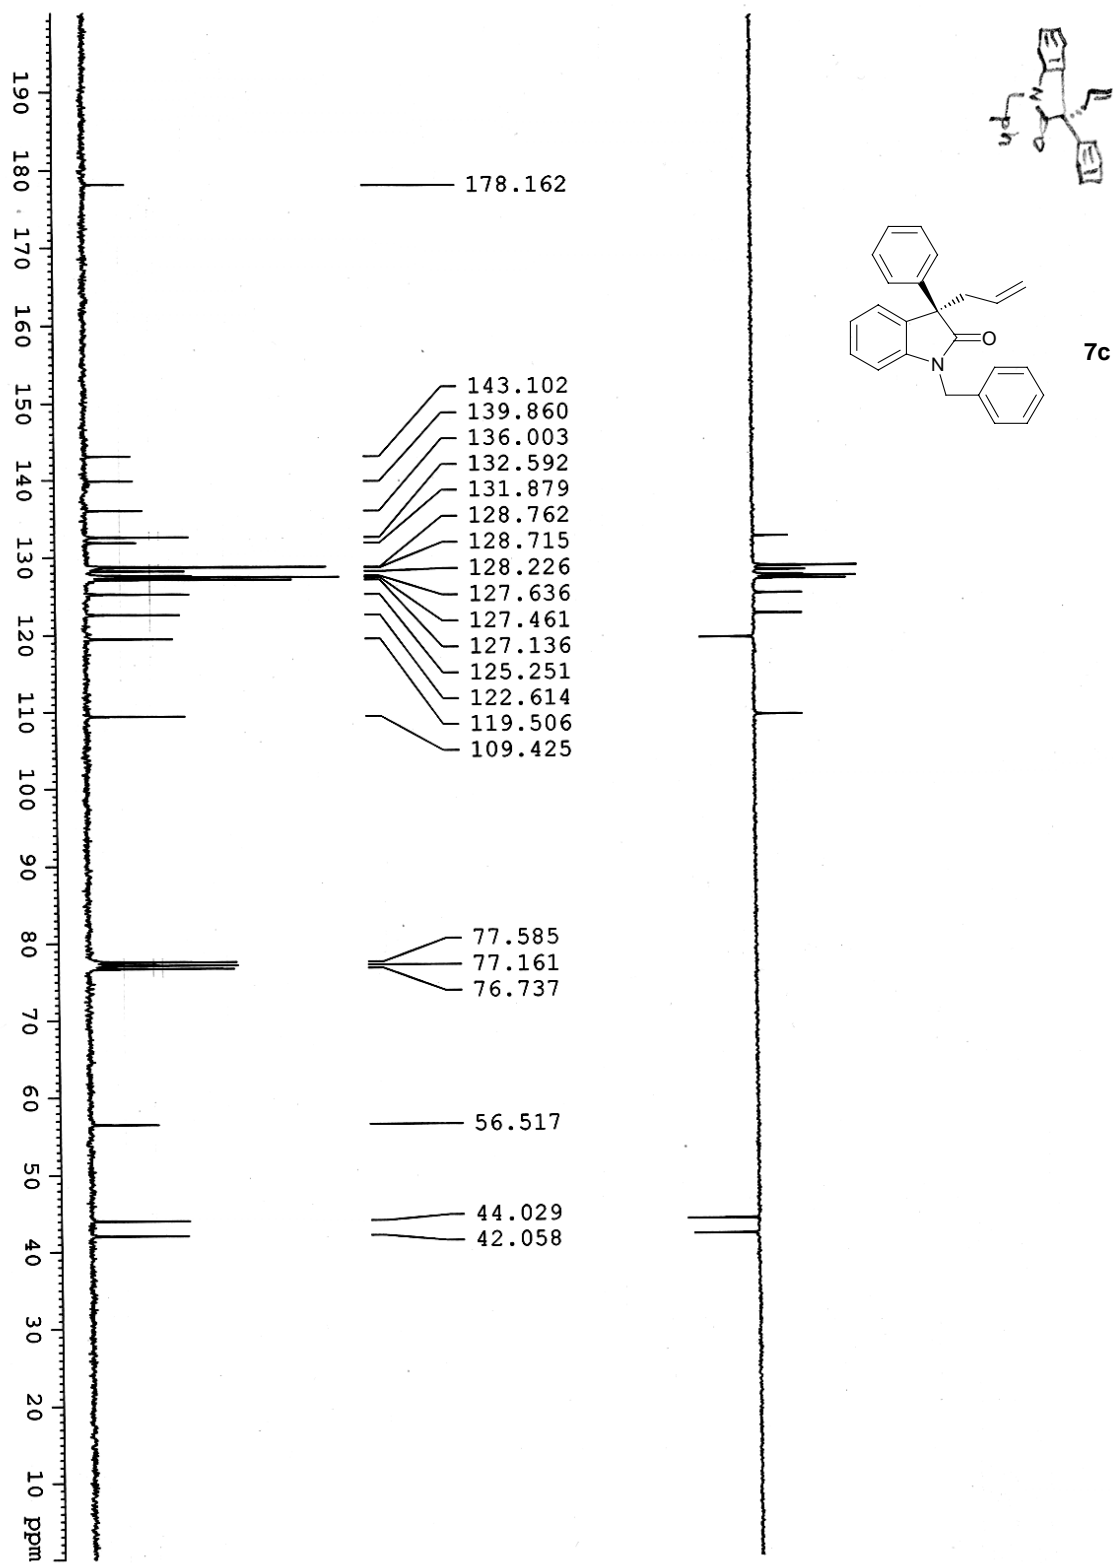

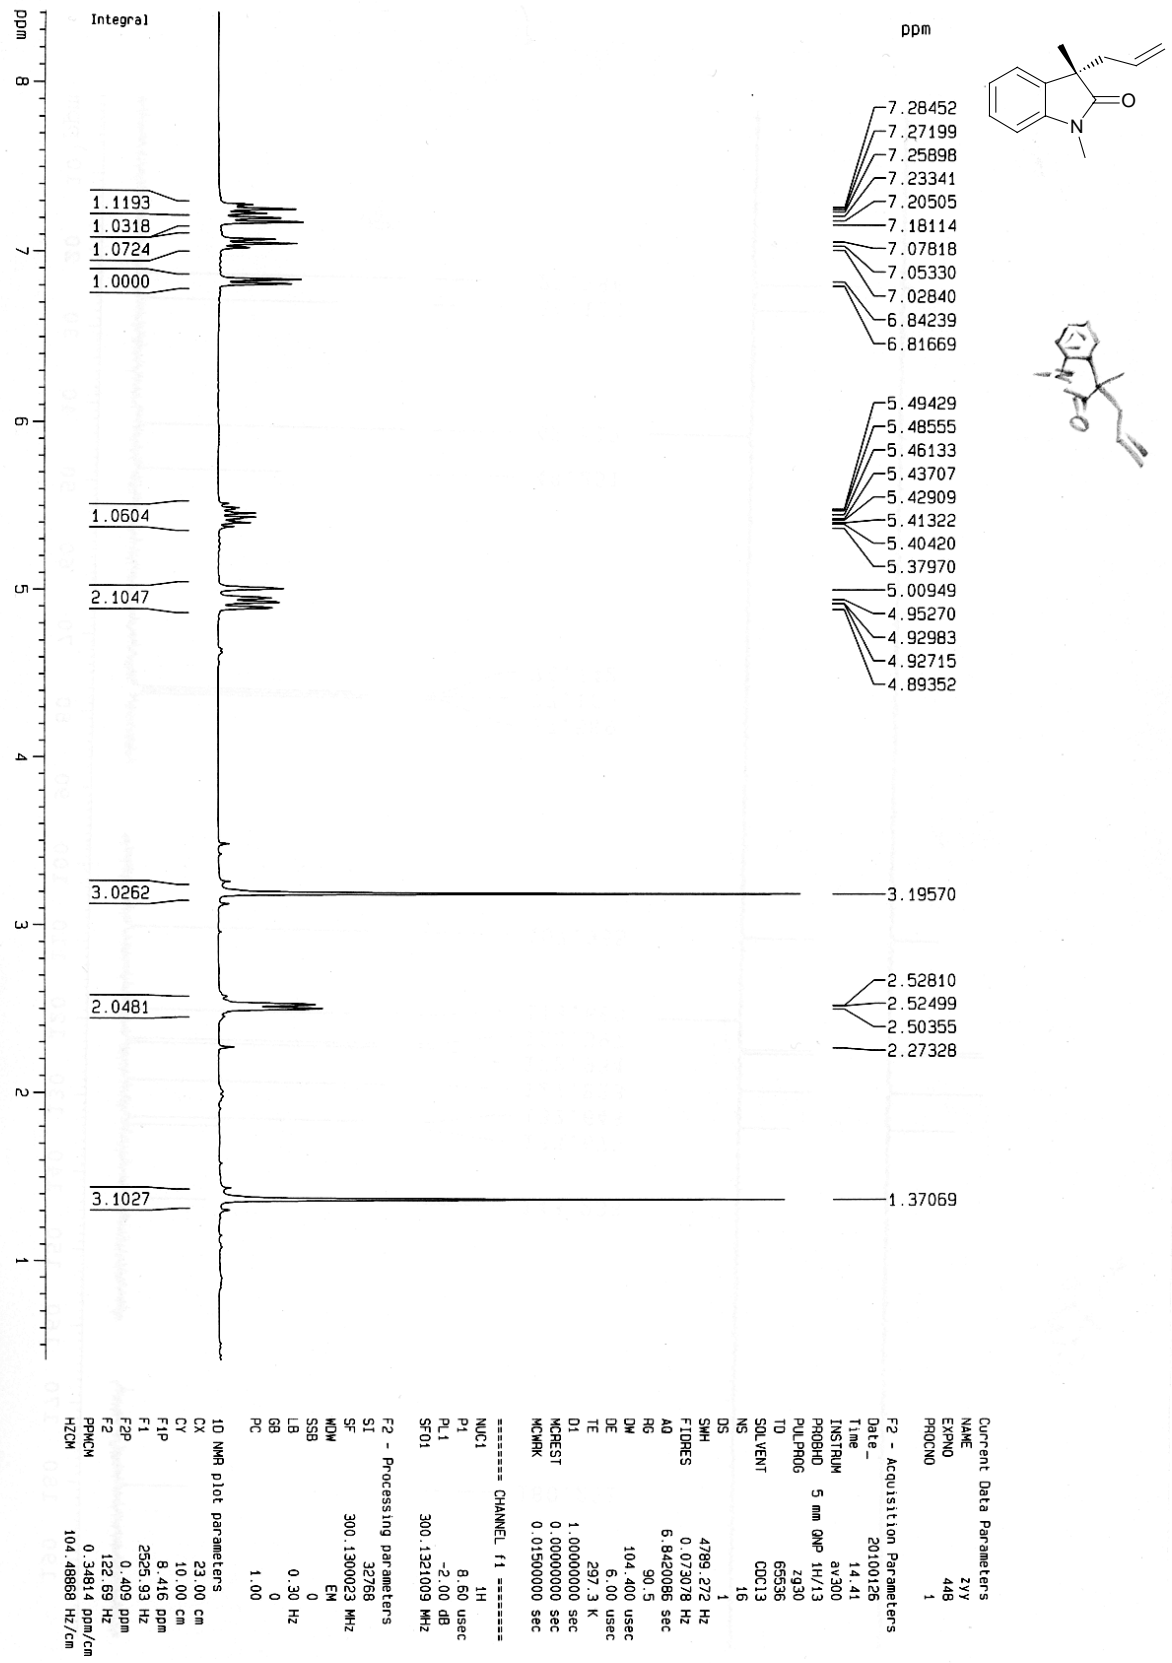

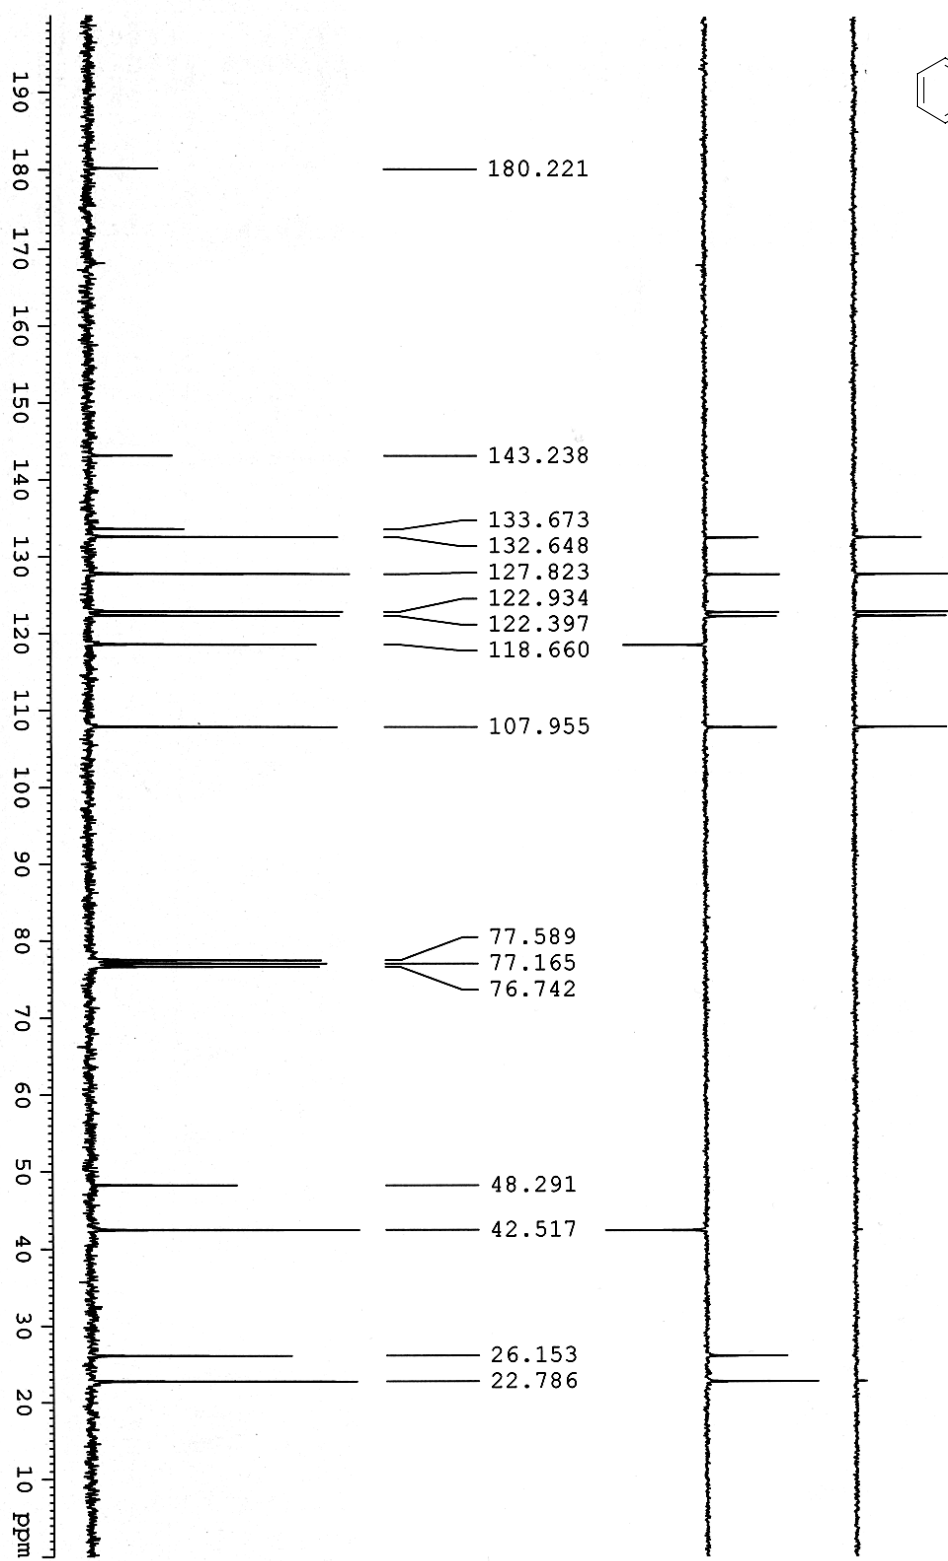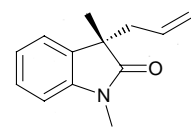

7d

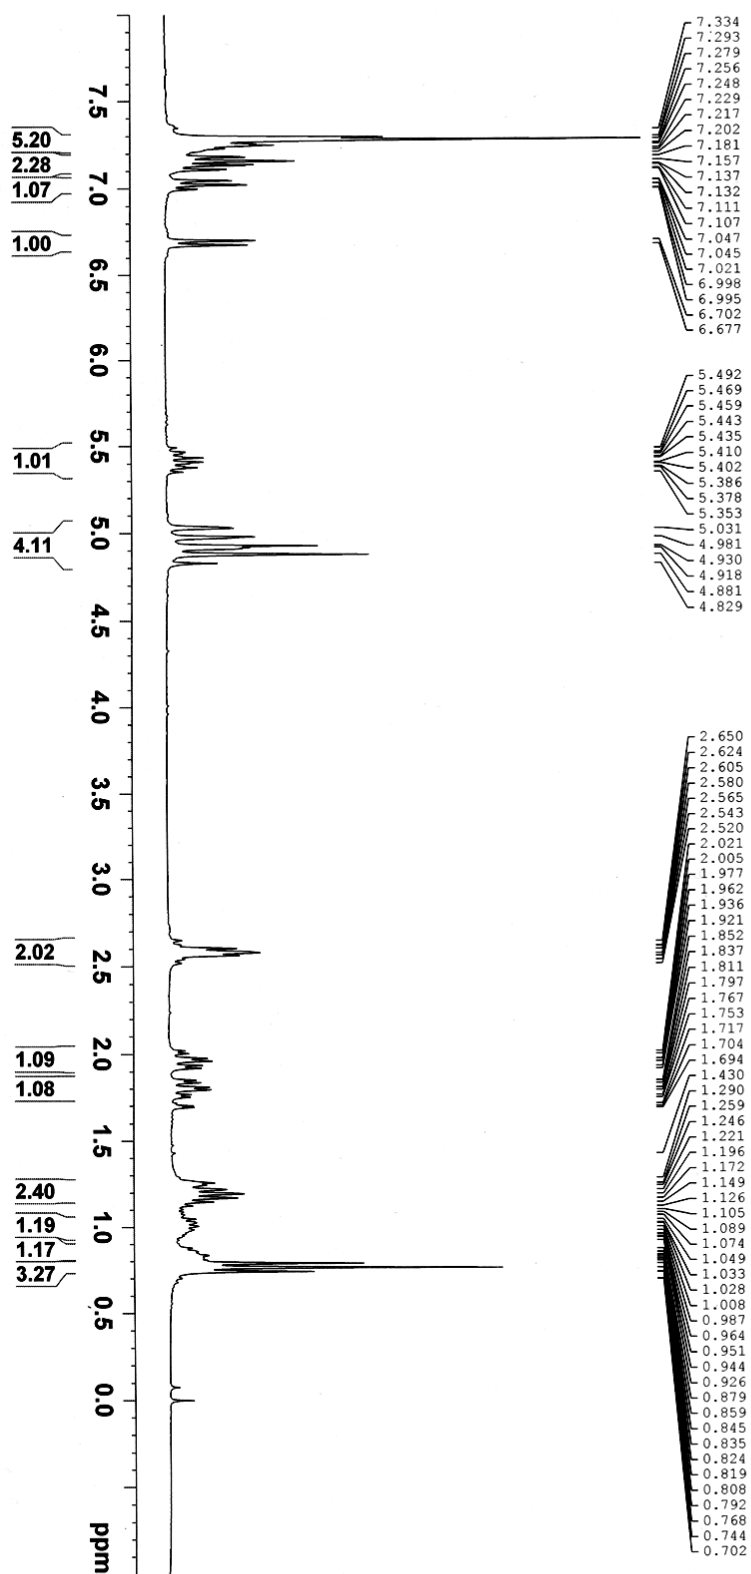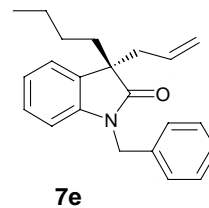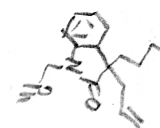

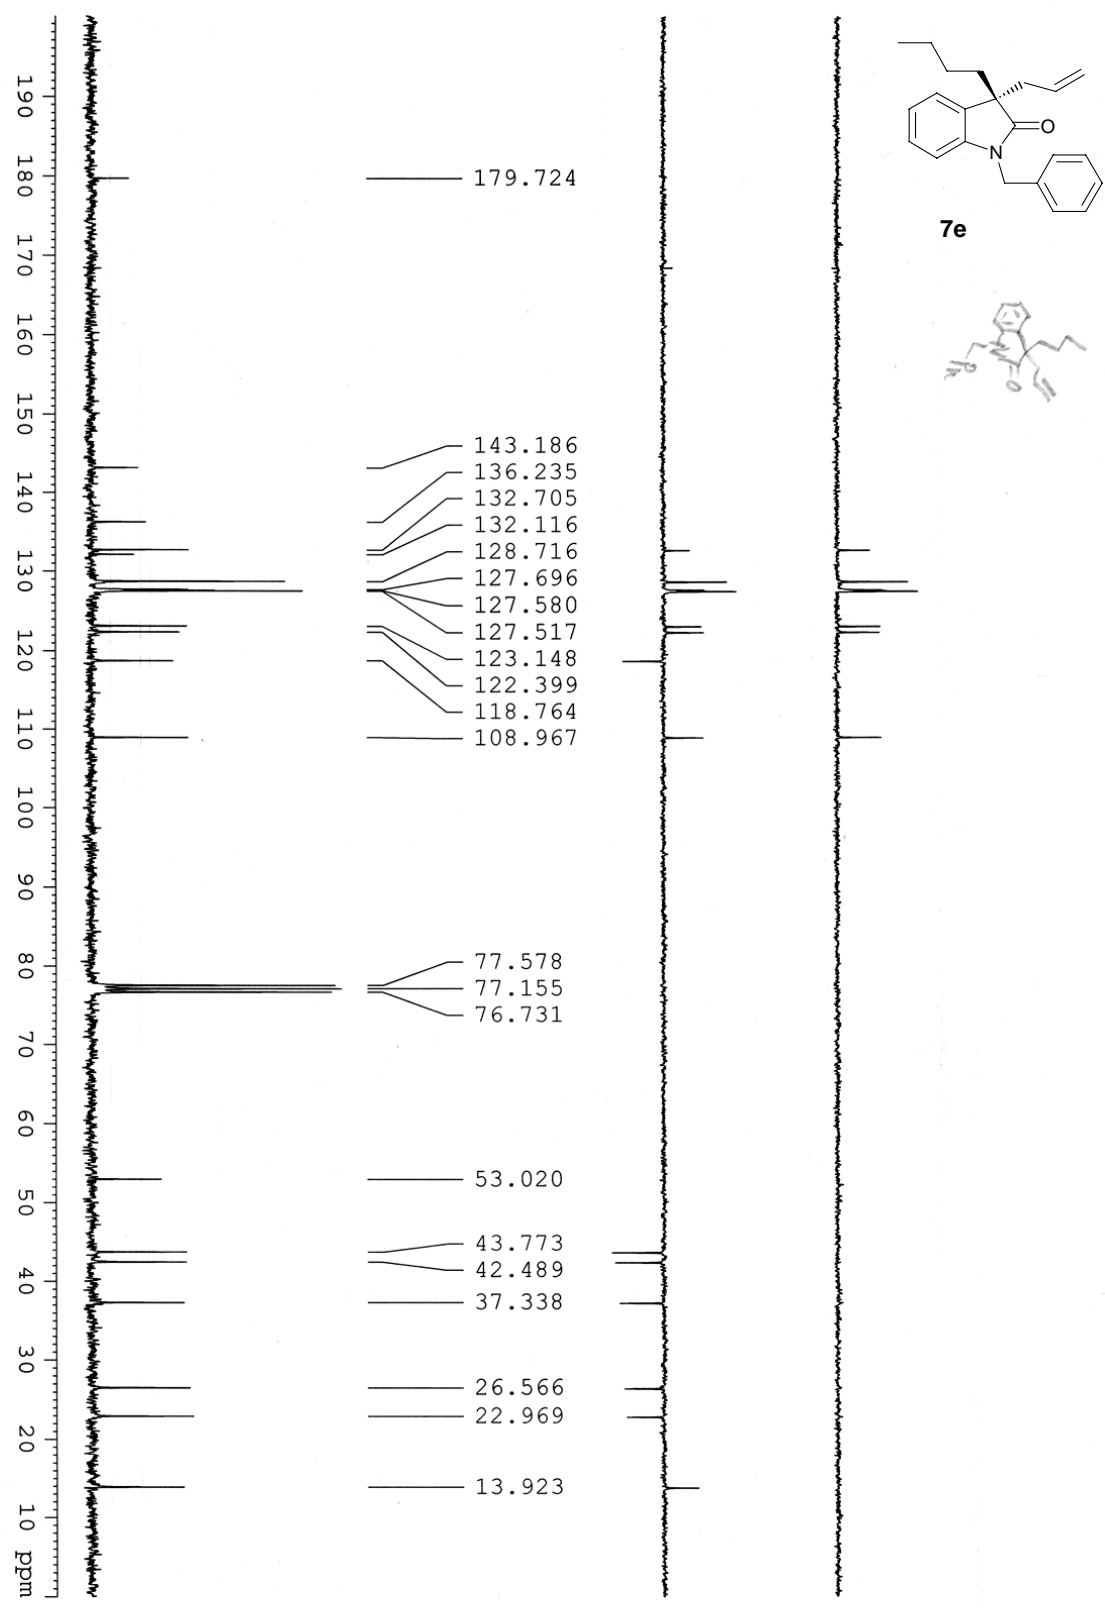

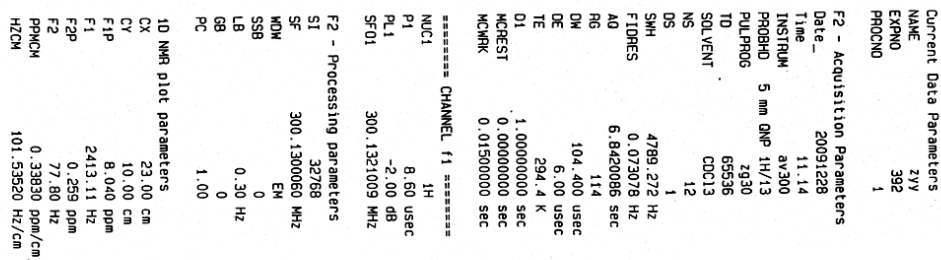

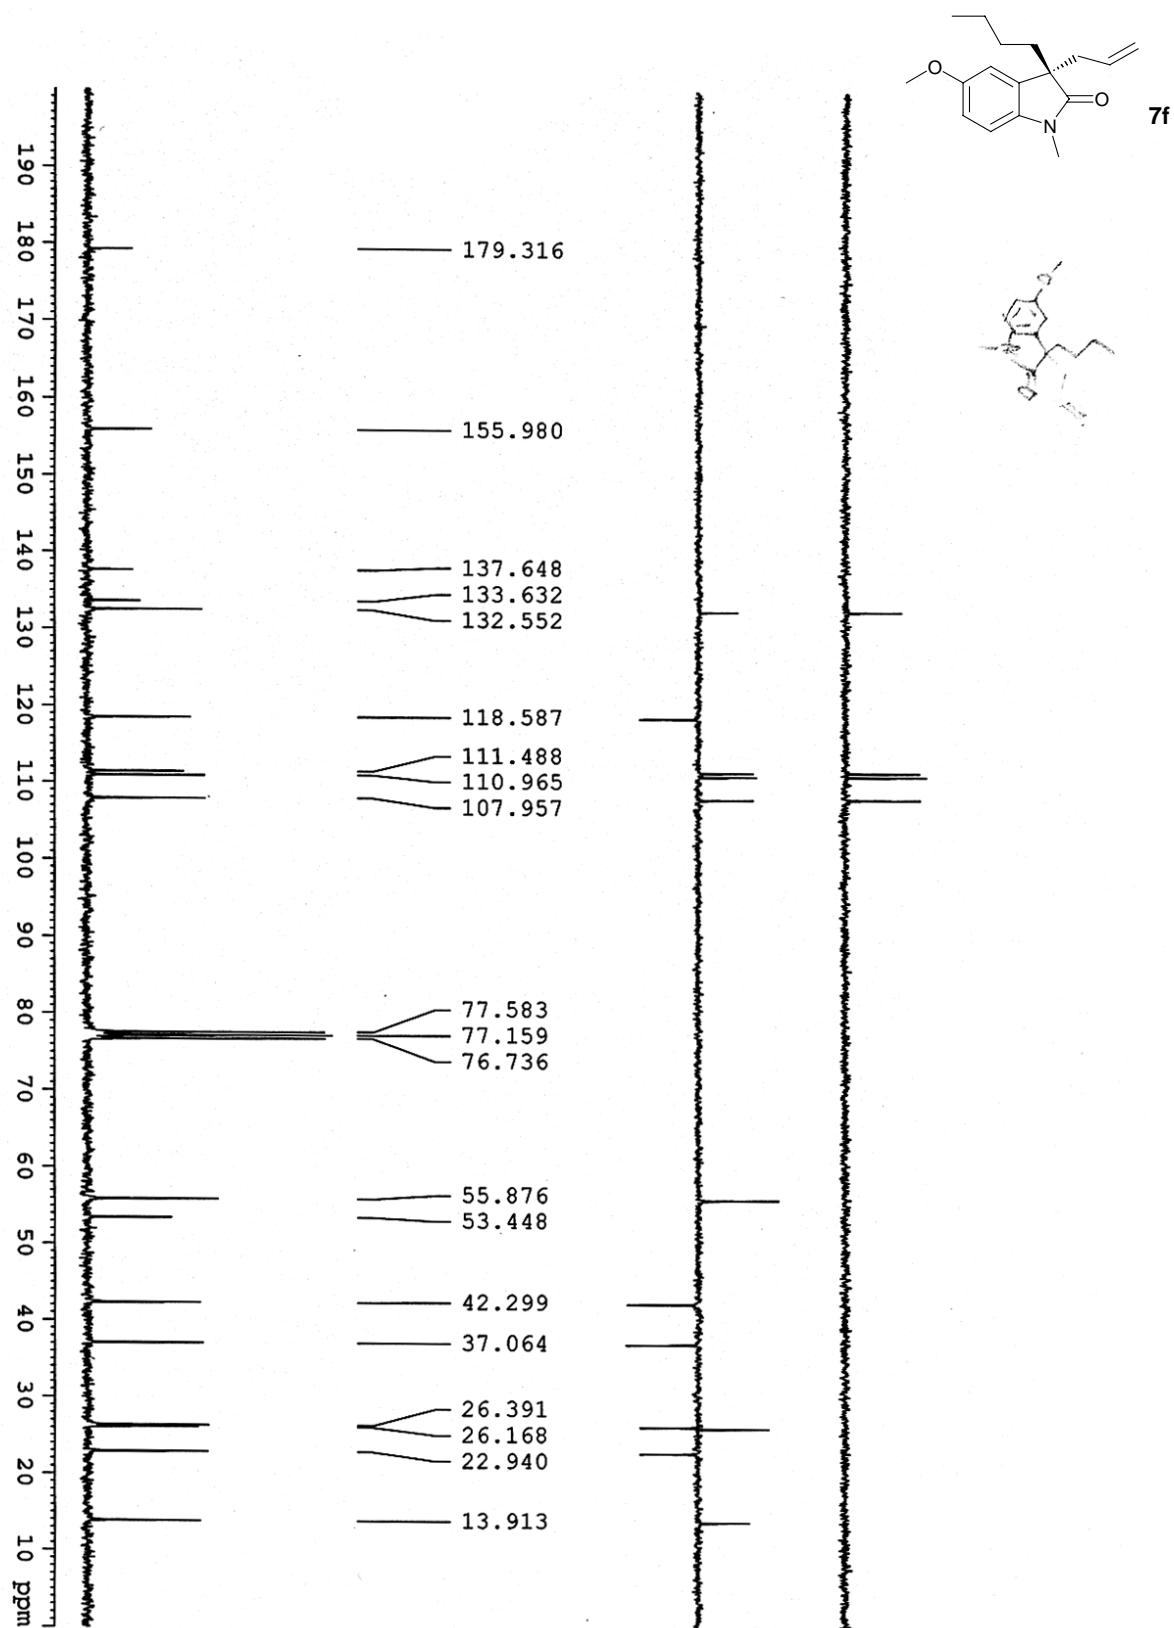



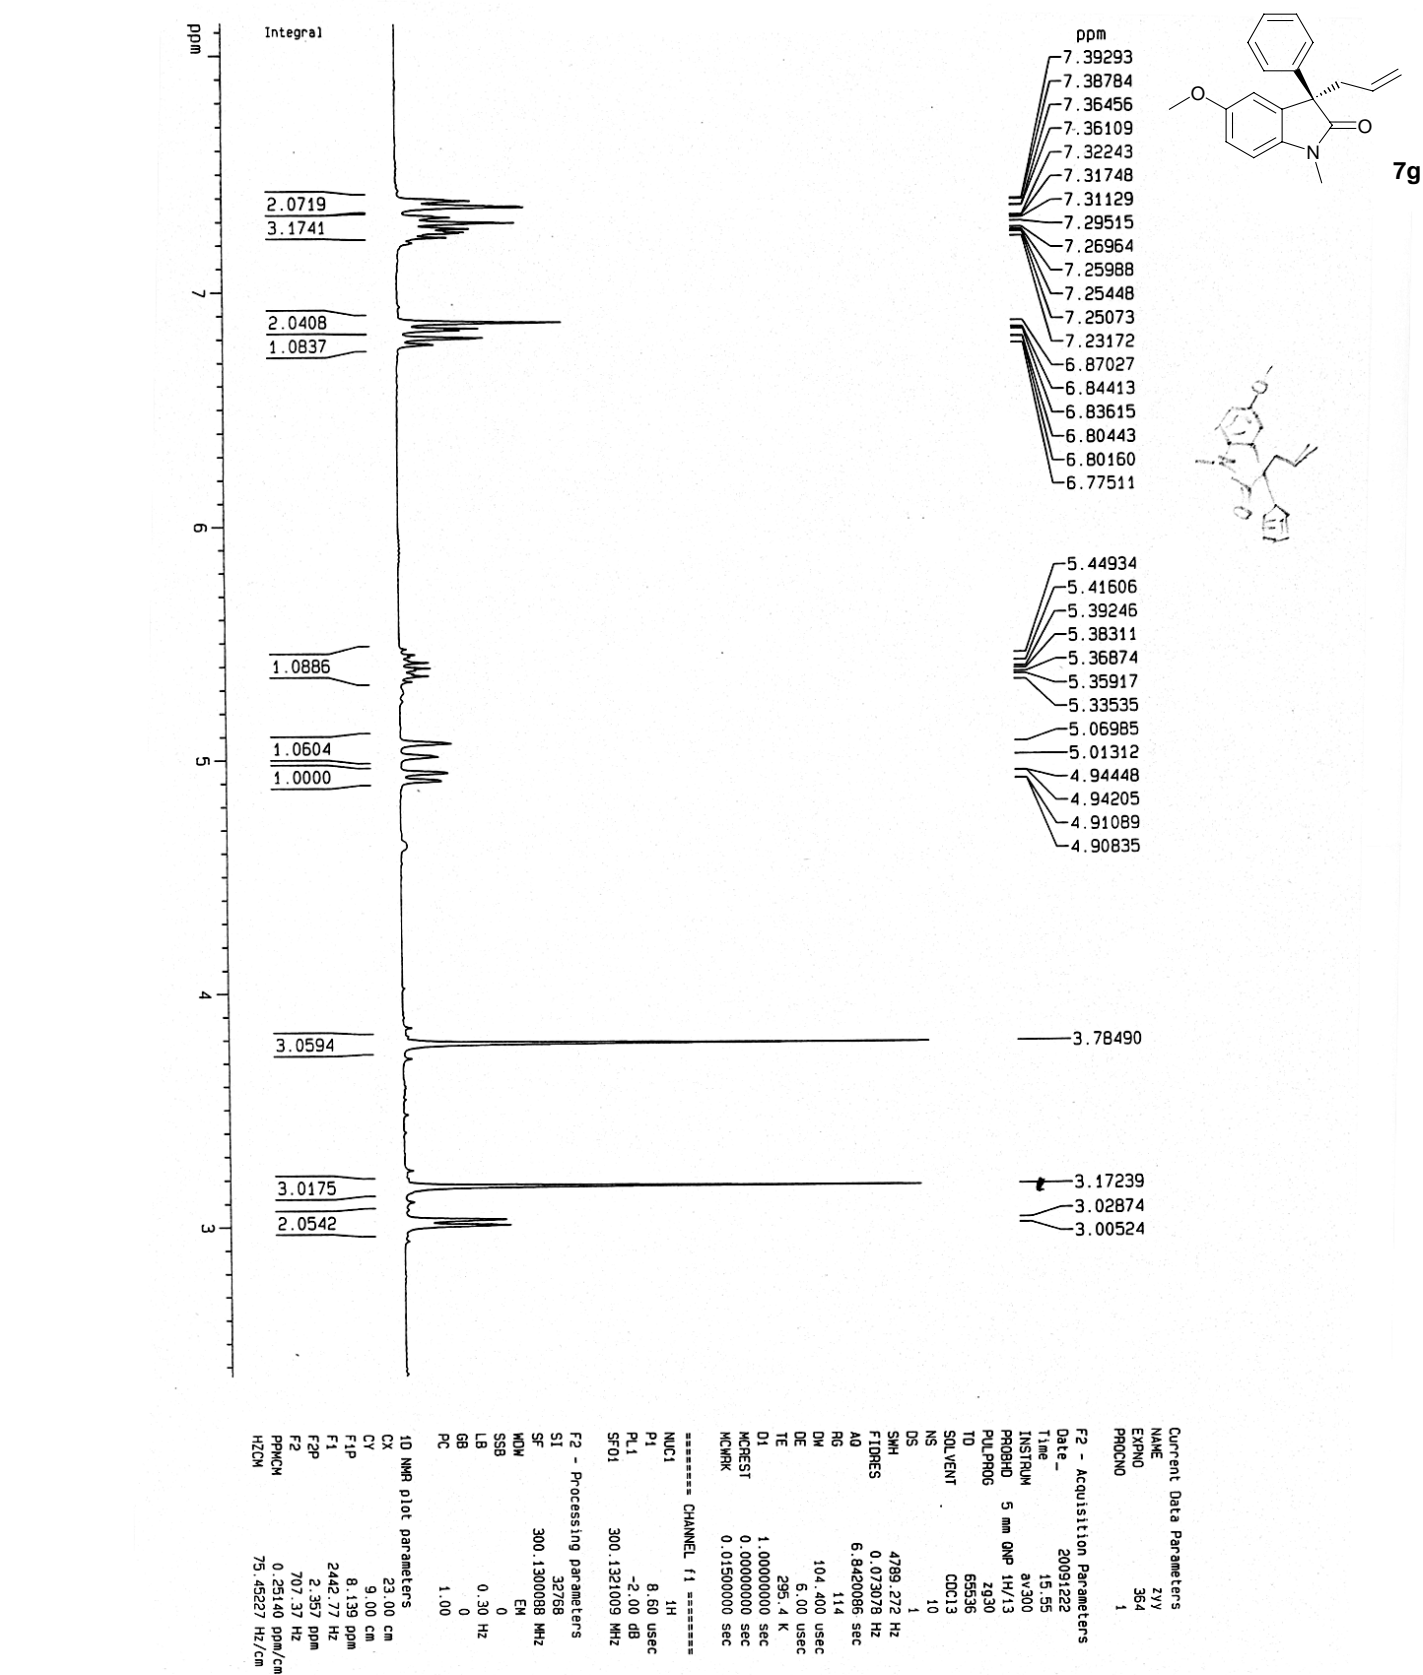



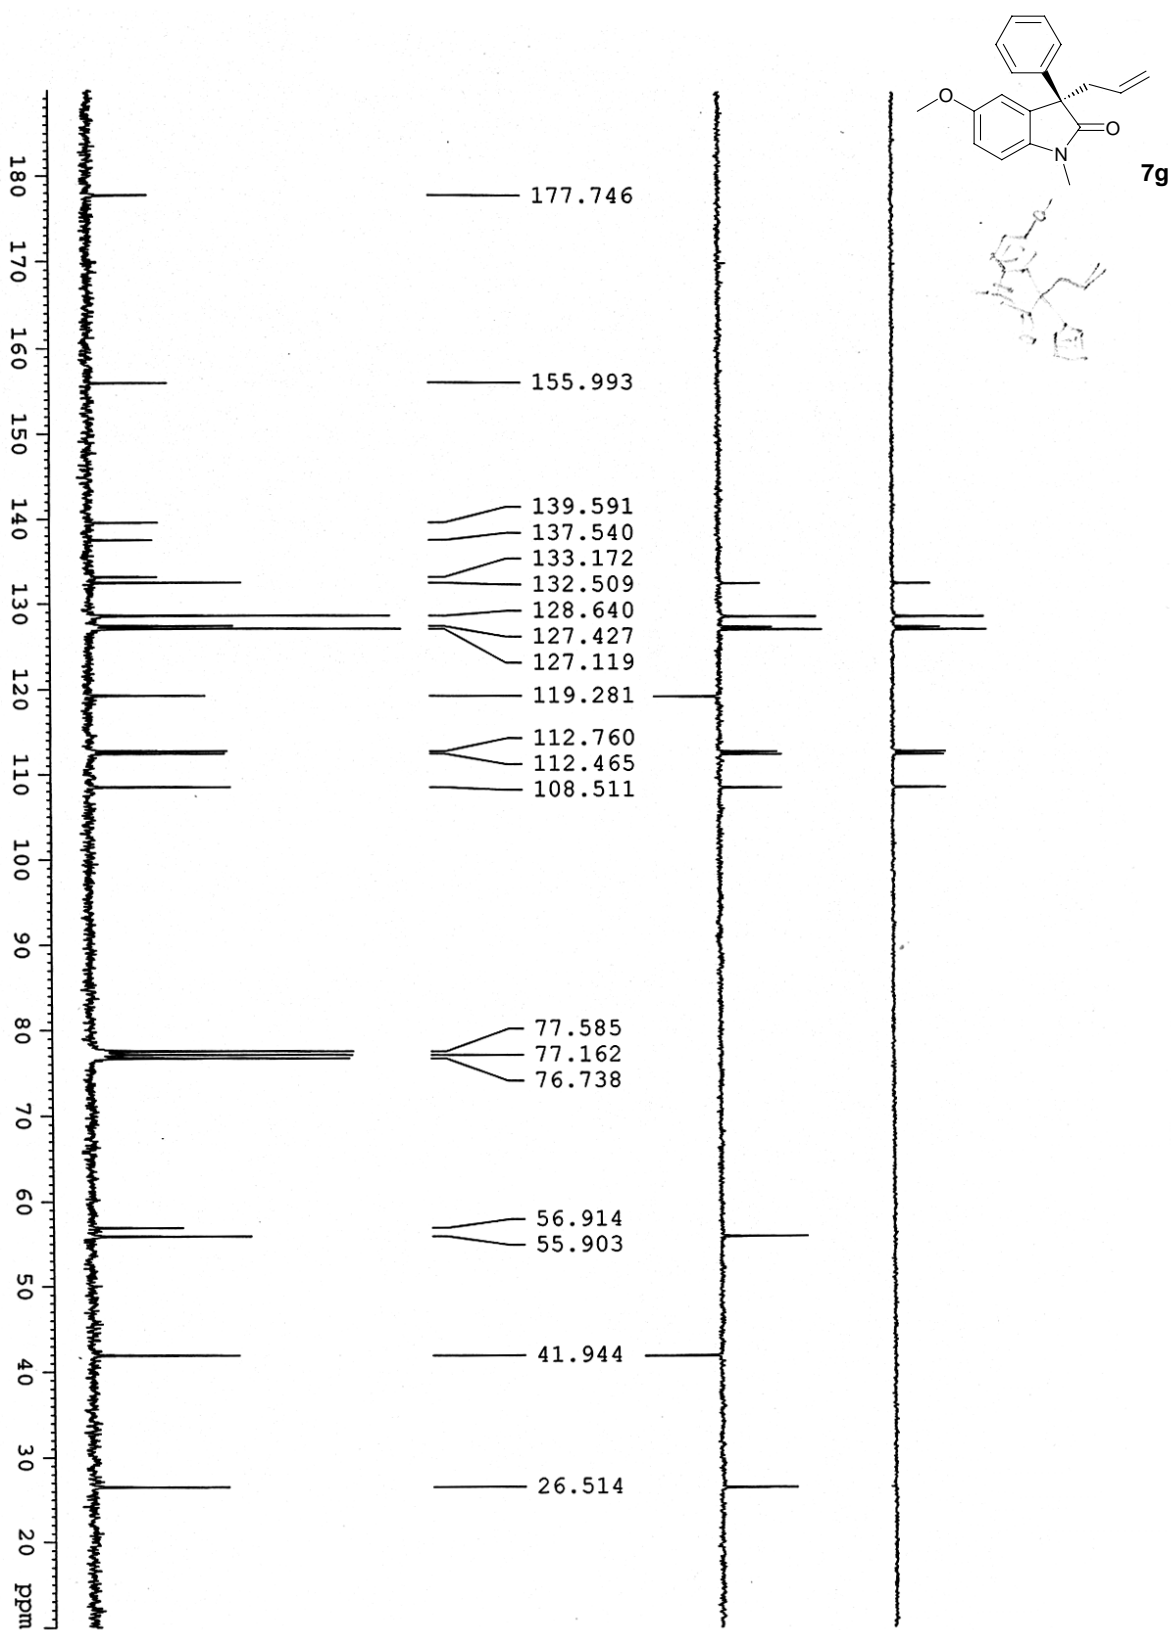

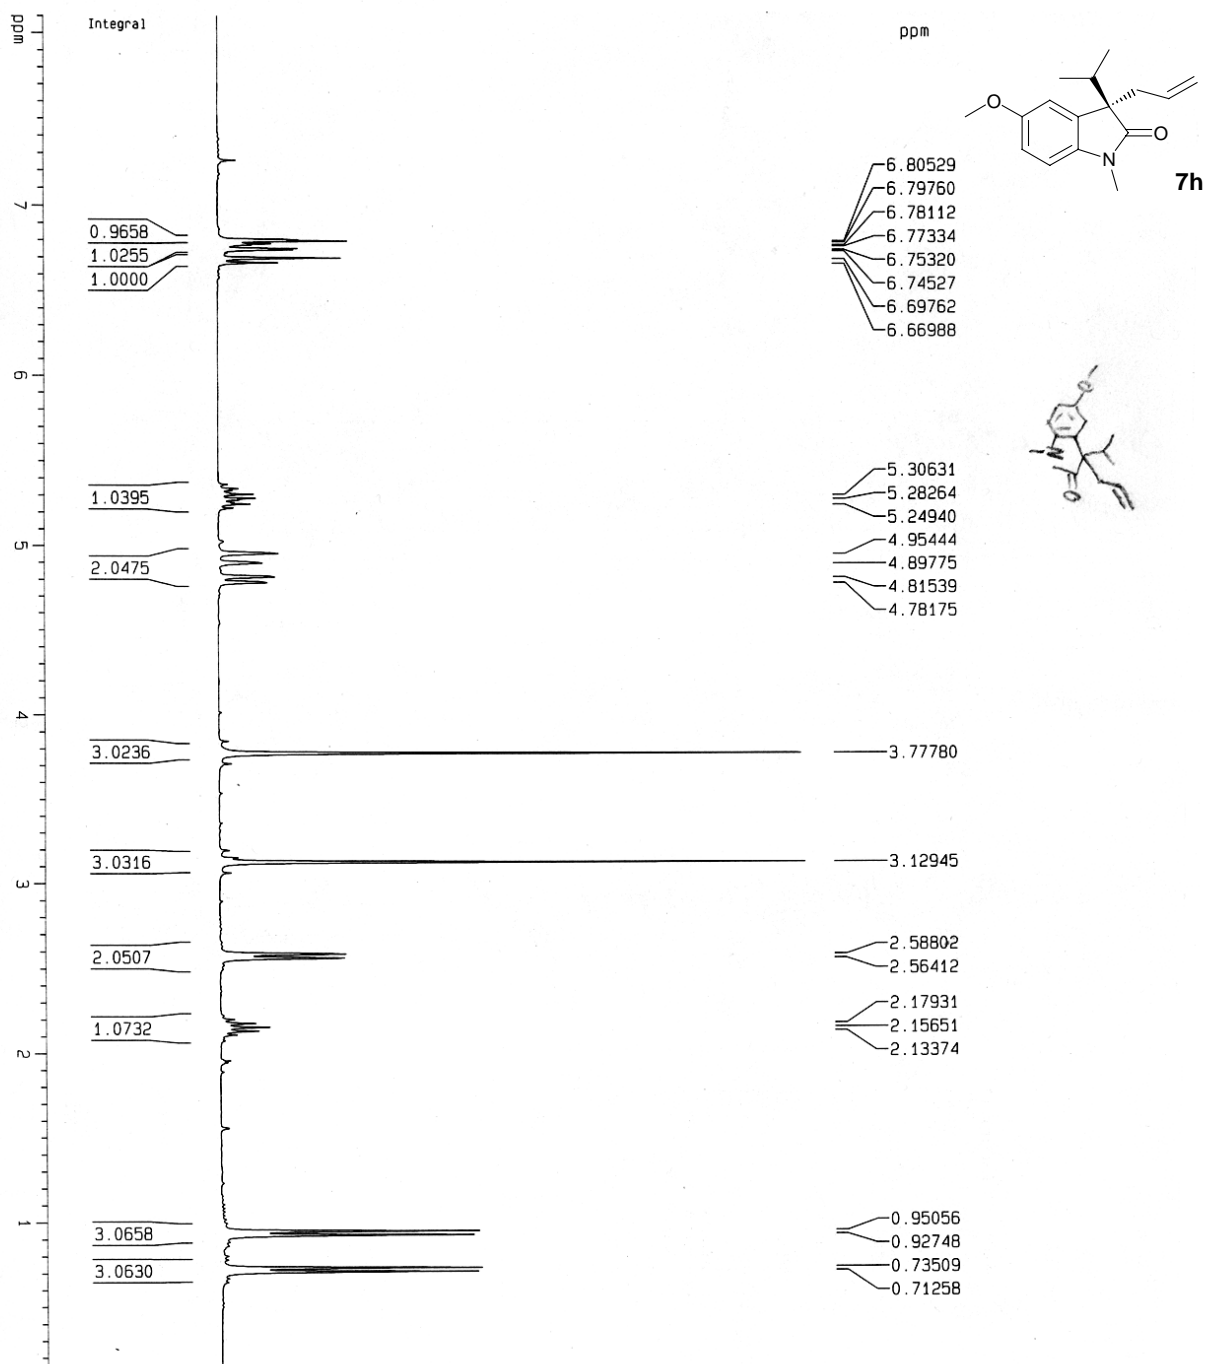

Current Data Parameters

|        |     |
|--------|-----|
| NAME   | 277 |
| EXPNO  | 470 |
| PROCNO | 1   |

F2 - Acquisition Parameters

|         |                |
|---------|----------------|
| Date_   | 20100202       |
| Time    | 17.41          |
| INSTRUM | av300          |
| PROBHD  | 5 mm GNP 1H/13 |
| PULPROG | zg30           |
| TD      | 65536          |
| SOLVENT | CDCl3          |
| NS      | 16             |
| DS      | 1              |
| SWH     | 4789.272 Hz    |
| FIDRES  | 0.073078 Hz    |
| AQ      | 6.842086 sec   |
| RG      | 80.6           |
| DW      | 104.400 usec   |
| DE      | 6.00 usec      |
| TE      | 296.0 K        |
| D1      | 1.00000000 sec |
| MCREST  | 0.00000000 sec |
| MCNMR   | 0.01500000 sec |

===== CHANNEL f1 =====

|      |                 |
|------|-----------------|
| NUC1 | 1H              |
| P1   | 8.60 usec       |
| PL1  | -2.00 dB        |
| SFO1 | 300.1321009 MHz |

F2 - Processing parameters

|     |                 |
|-----|-----------------|
| SI  | 32768           |
| SF  | 300.1300059 MHz |
| WDW | EM              |
| SSB | 0               |
| LB  | 0.30 Hz         |
| GB  | 0               |
| PC  | 1.00            |

1D NMR plot parameters

|       |                 |
|-------|-----------------|
| CX    | 23.00 cm        |
| CY    | 10.00 cm        |
| F1P   | 8.108 ppm       |
| F1    | 2433.39 Hz      |
| F2P   | 0.155 ppm       |
| F2    | 46.63 Hz        |
| PPMCM | 0.34576 ppm/cm  |
| HZCM  | 103.77251 Hz/cm |

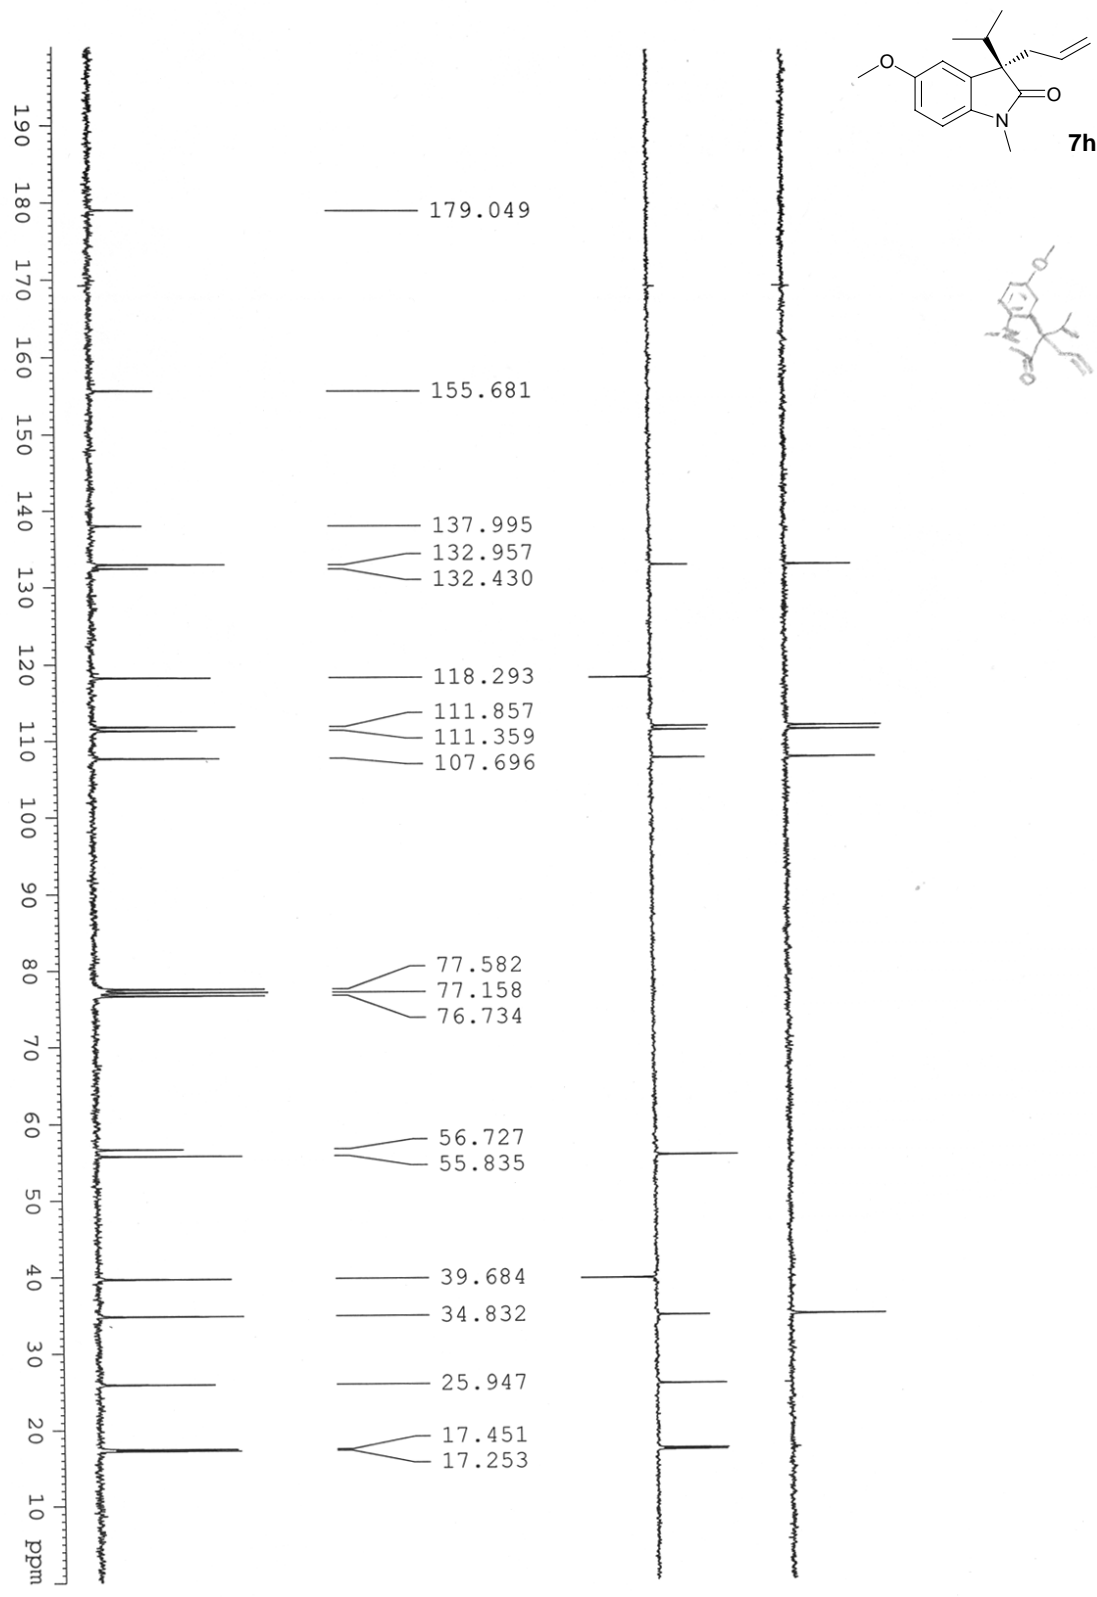

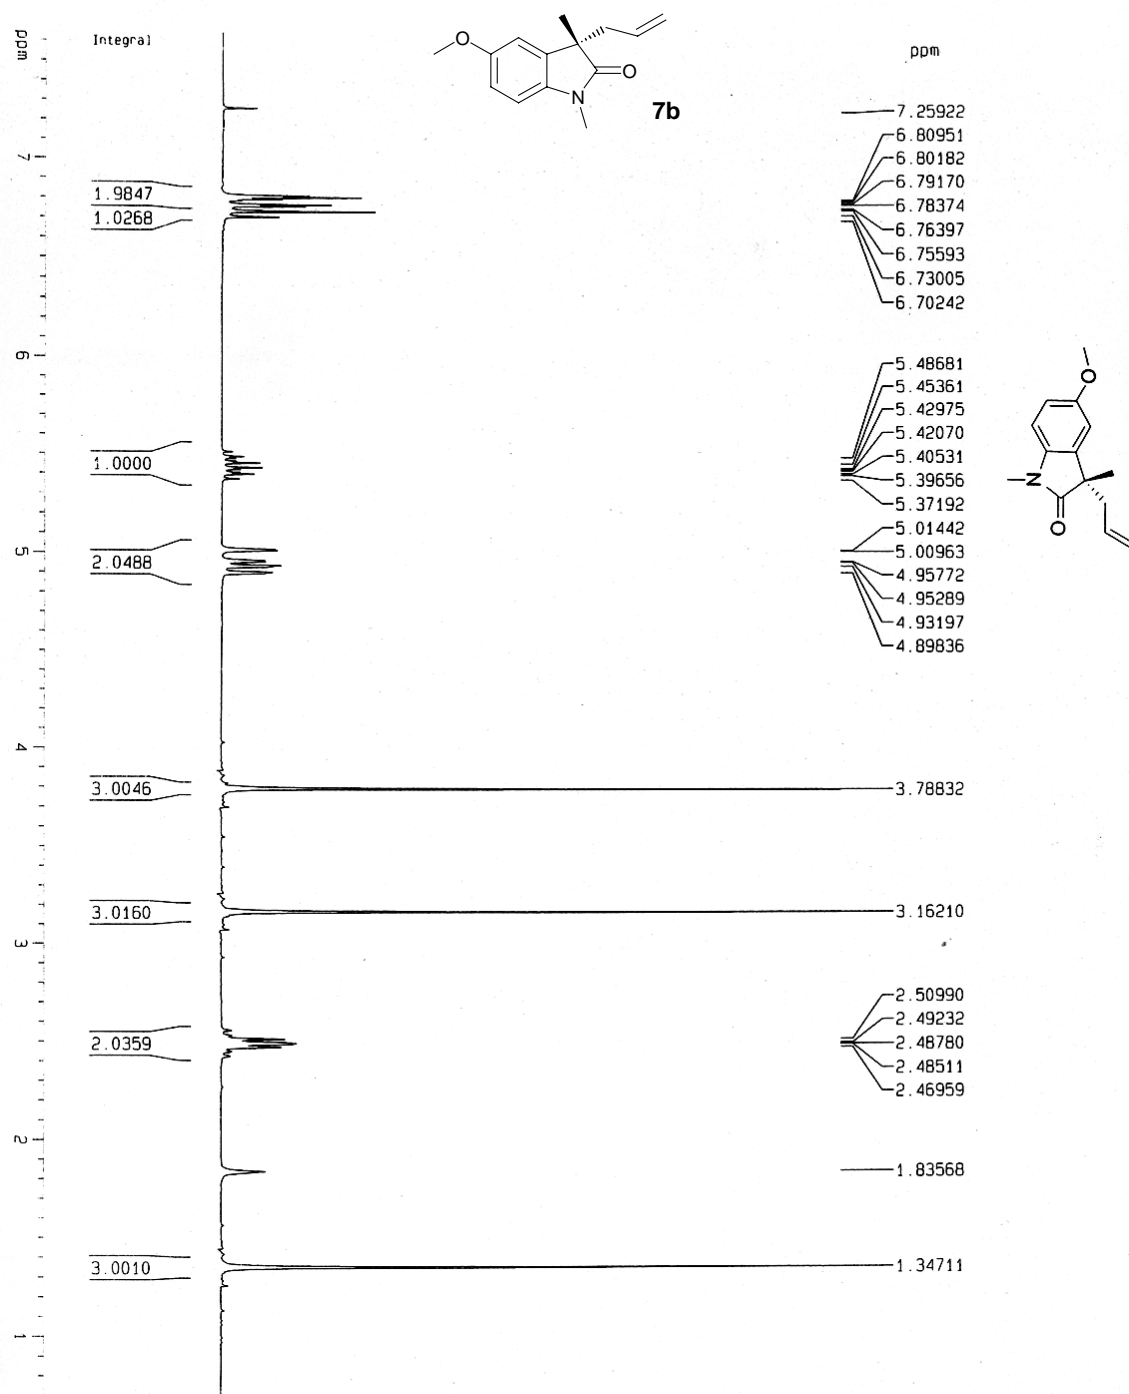

Current Data Parameters  
NAME ZYY  
EXPNO 214  
PROCNO 1  
F2 - Acquisition Parameters  
Date\_ 20081119  
Time 9.19  
INSTRUM 5 mm QNP 1H/13  
PROBHD 5 mm QNP 1H/13  
PULPROG zgpg30  
TO 2930  
SOLVENT CDCl3  
NS 16  
DS 1  
SWH 4789.272 Hz  
FIDRES 0.073078 Hz  
AQ 6.8420086 sec  
RG 161.3  
DM 104.400 usec  
DE 6.00 usec  
TE 295.8 K  
C1 1.00000000 sec  
WCREST 0.00000000 sec  
WCMR 0.01500000 sec  
===== CHANNEL f1 =====  
NUC1 1H  
P1 8.60 usec  
PL1 -2.00 dB  
SFO1 300.1321009 MHz  
F2 - Processing parameters  
SI 32768  
SF 300.1300123 MHz  
WDW EM  
SSB 0  
-B 0.30 Hz  
GB 0  
PC 1.00  
1D NMR plot parameters  
CX 23.00 cm  
CY 12.50 cm  
F1P 7.645 ppm  
F1 2294.55 Hz  
F2P 0.686 ppm  
F2 205.86 Hz  
PCPCW 0.30258 ppm/cm  
FZCM 90.81250 Hz/cm

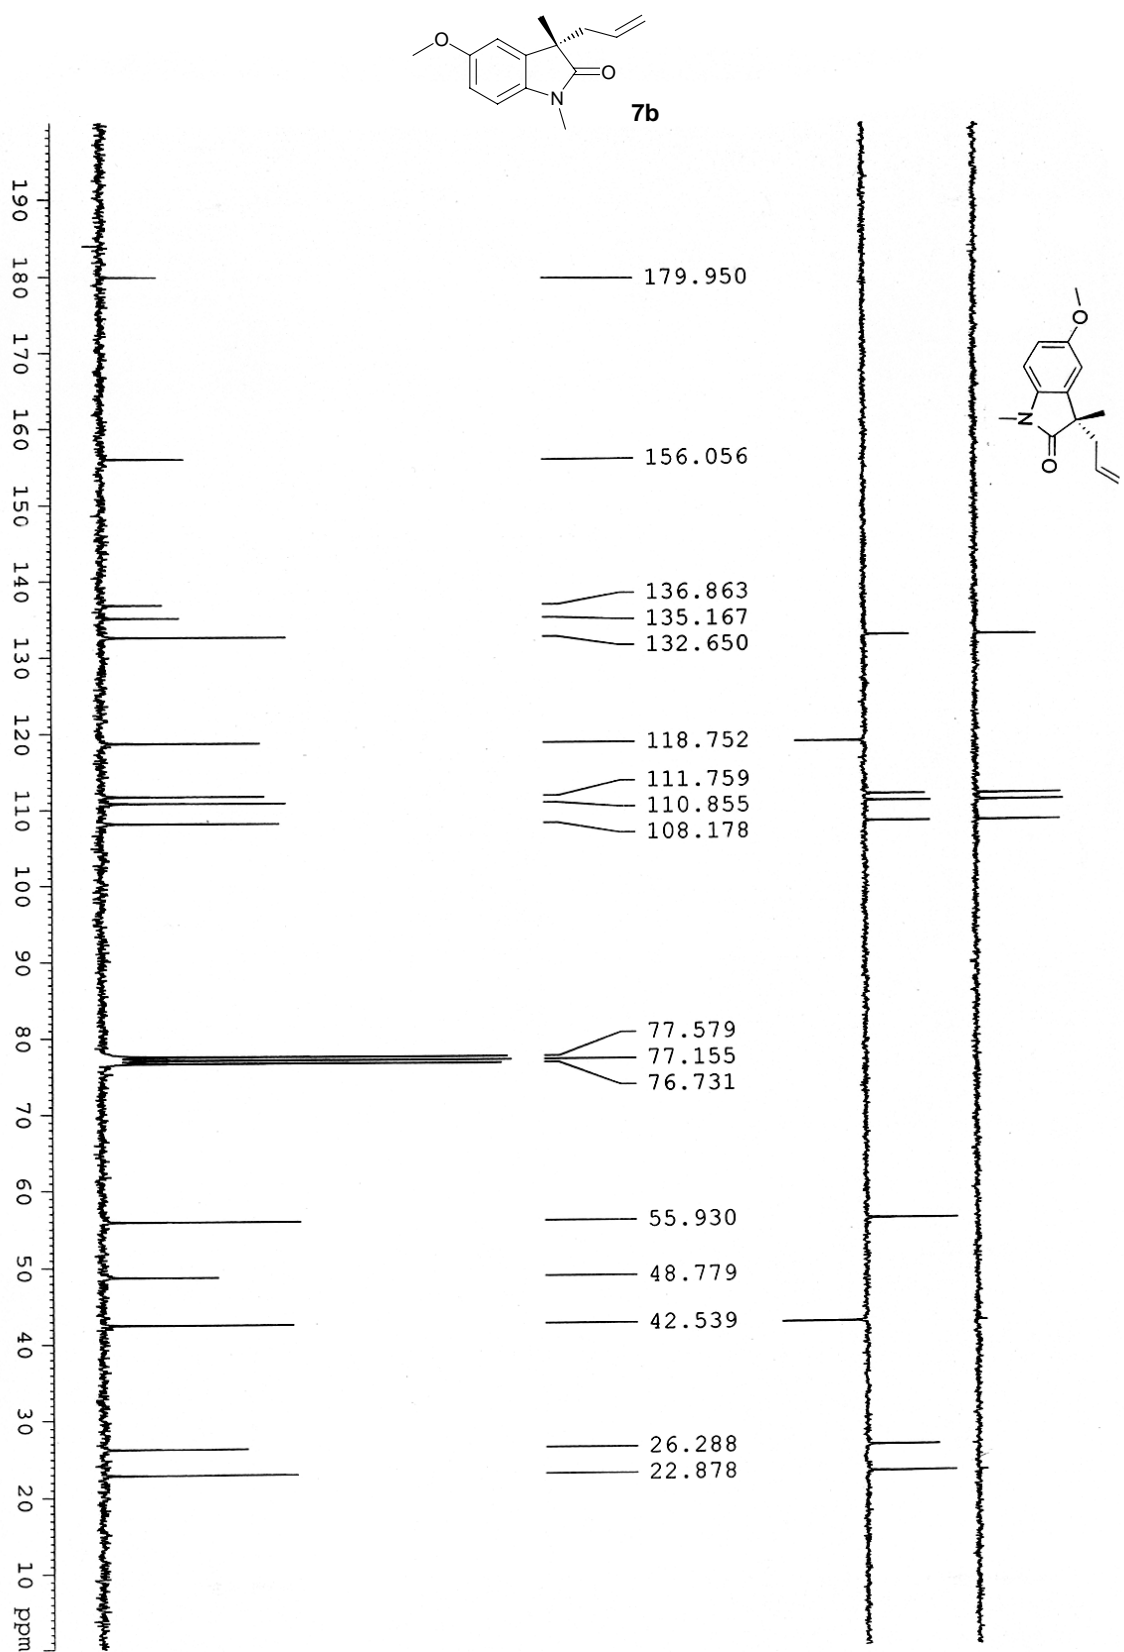

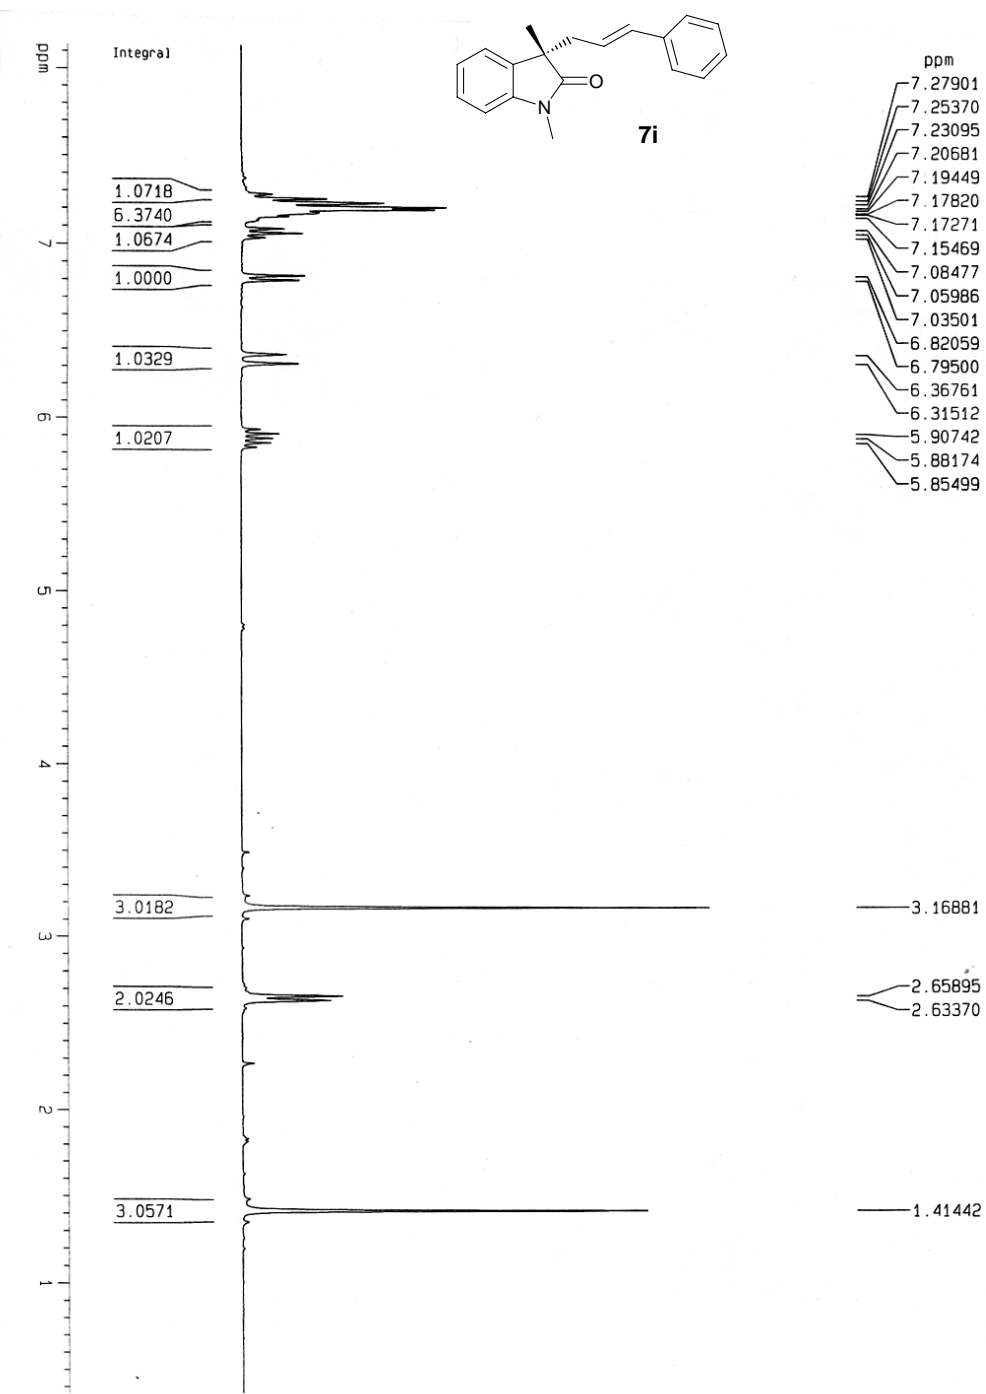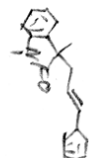

Current Data Parameters  
NAME: zyy  
EXPNO: 517  
PROCNO: 1

F2 - Acquisition Parameters  
Date\_: 20100224  
Time: 9.37  
INSTRUM: av300  
PROBHD: 5 mm QNP 1H/13  
PULPROG: zg30  
TD: 65536  
SOLVENT: CDCl3  
NS: 16  
DS: 1  
SWH: 4789.272 Hz  
FIDRES: 0.073078 Hz  
AQ: 6.8420065 sec  
RG: 114  
DM: 104.400 usec  
DE: 6.00 usec  
TE: 295.4 K  
D1: 1.00000000 sec  
MCREST: 0.00000000 sec  
MCNMRK: 0.01500000 sec

===== CHANNEL f1 =====  
NUC1: 1H  
P1: 8.60 usec  
PL1: -2.00 dB  
SF01: 300.1321009 MHz

F2 - Processing parameters  
SI: 32768  
SF: 300.1300123 MHz  
WDW: EM  
SSB: 0  
LB: 0.30 Hz  
GB: 0  
PC: 1.00

1D NMR plot parameters  
CX: 23.00 cm  
CY: 8.00 cm  
F1P: 8.139 ppm  
F1: 2442.66 Hz  
F2P: 0.361 ppm  
F2: 108.35 Hz  
PPMCM: 0.33816 ppm/cm  
HZCM: 101.49178 Hz/cm

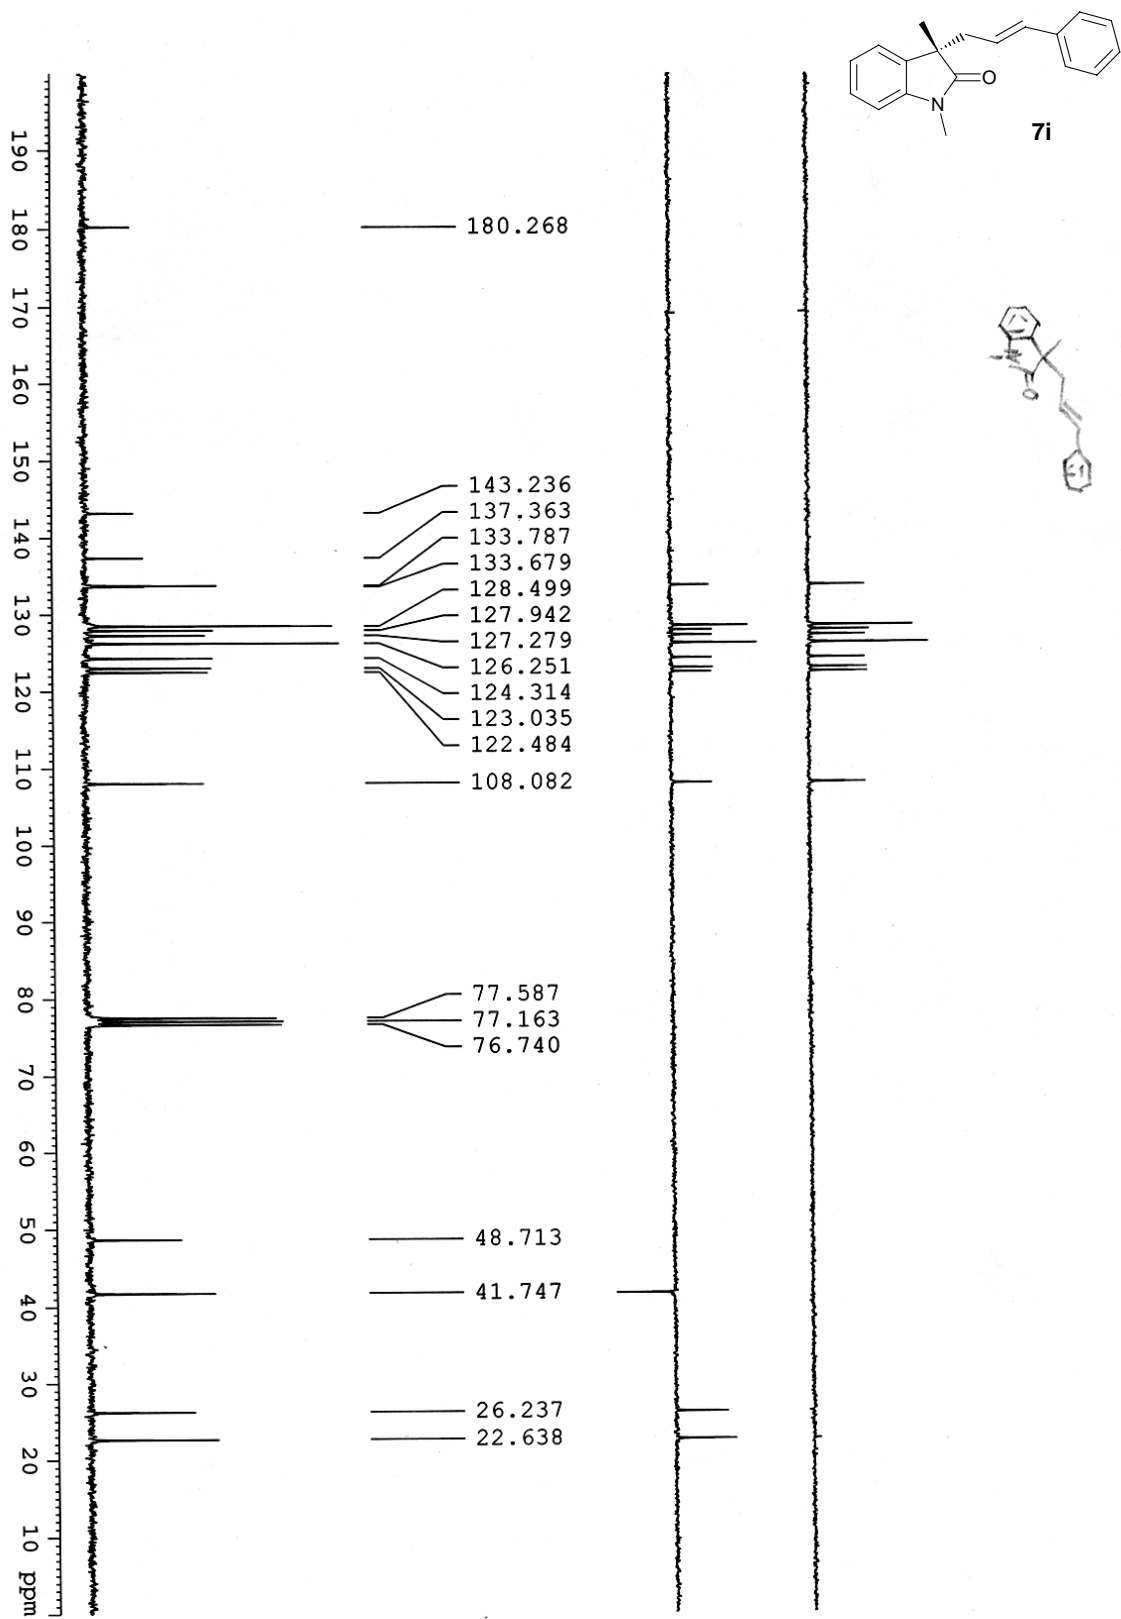

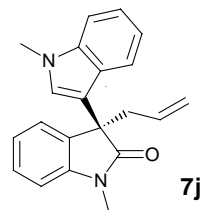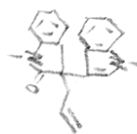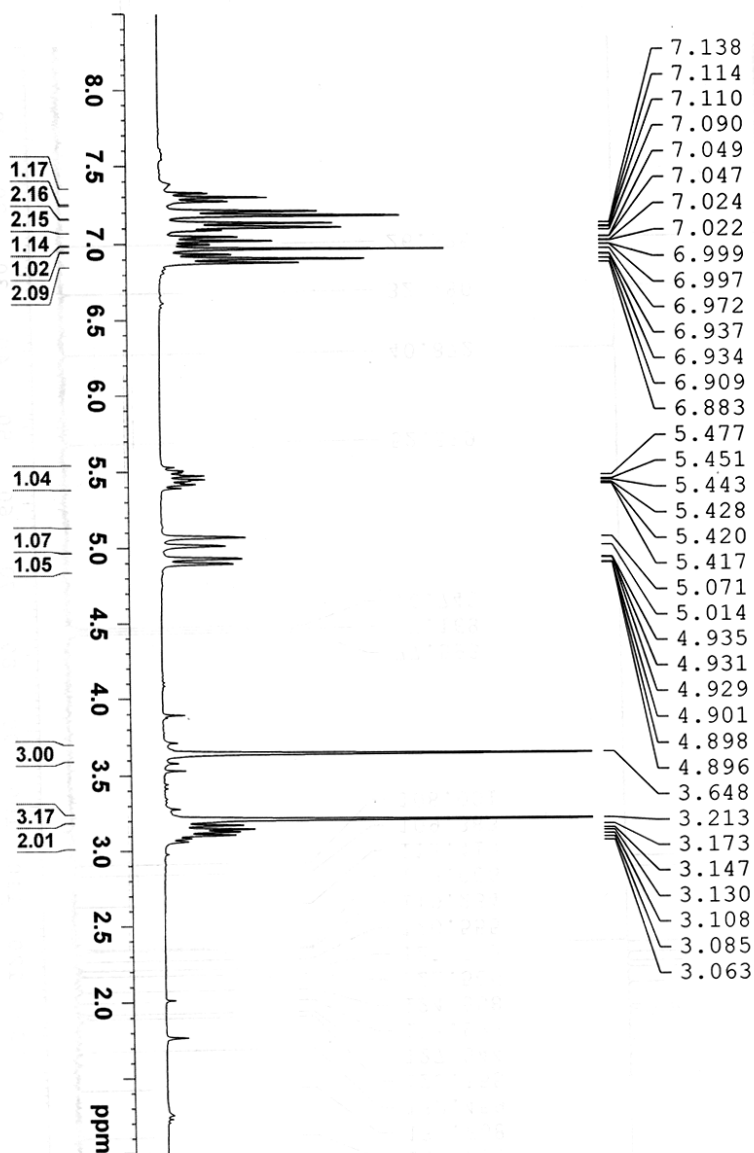

Current Data Parameters  
NAME zyy  
EXPNO 587  
PROCNO 1

F2 - Acquisition Parameters  
Date\_ 20100401  
Time\_ 16.34  
INSTRUM av300  
PROBHD 5 mm QNP 1H/13  
PULPROG zg30  
TD 65536  
SOLVENT CDCl3  
NS 13  
DS 1  
SWH 4789.272 Hz  
FIDRES 0.073078 Hz  
AQ 6.8420086 sec  
RG 64  
RG 104.400 usec  
DE 6.00 usec  
TE 296.0 K  
D1 1.00000000 sec  
MCREST 0.00000000 sec  
MCMRK 0.01500000 sec

===== CHANNEL f1 =====  
NUC1 1H  
P1 8.60 usec  
PL1 -2.00 dB  
SFO1 300.1321009 MHz

F2 - Processing parameters  
SI 32768  
SF 300.1300294 MHz  
WDW EM  
SSB 0  
LB 0.30 Hz  
GB 0  
PC 1.00

1D NMR plot parameters  
CX 23.00 cm  
CY 12.50 cm  
F1P 8.331 ppm  
F1 2500.31 Hz  
F2P 0.614 ppm  
F2 184.43 Hz  
PPVCM 0.33549 ppm/cm  
HZCM 100.69063 Hz/cm

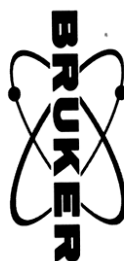



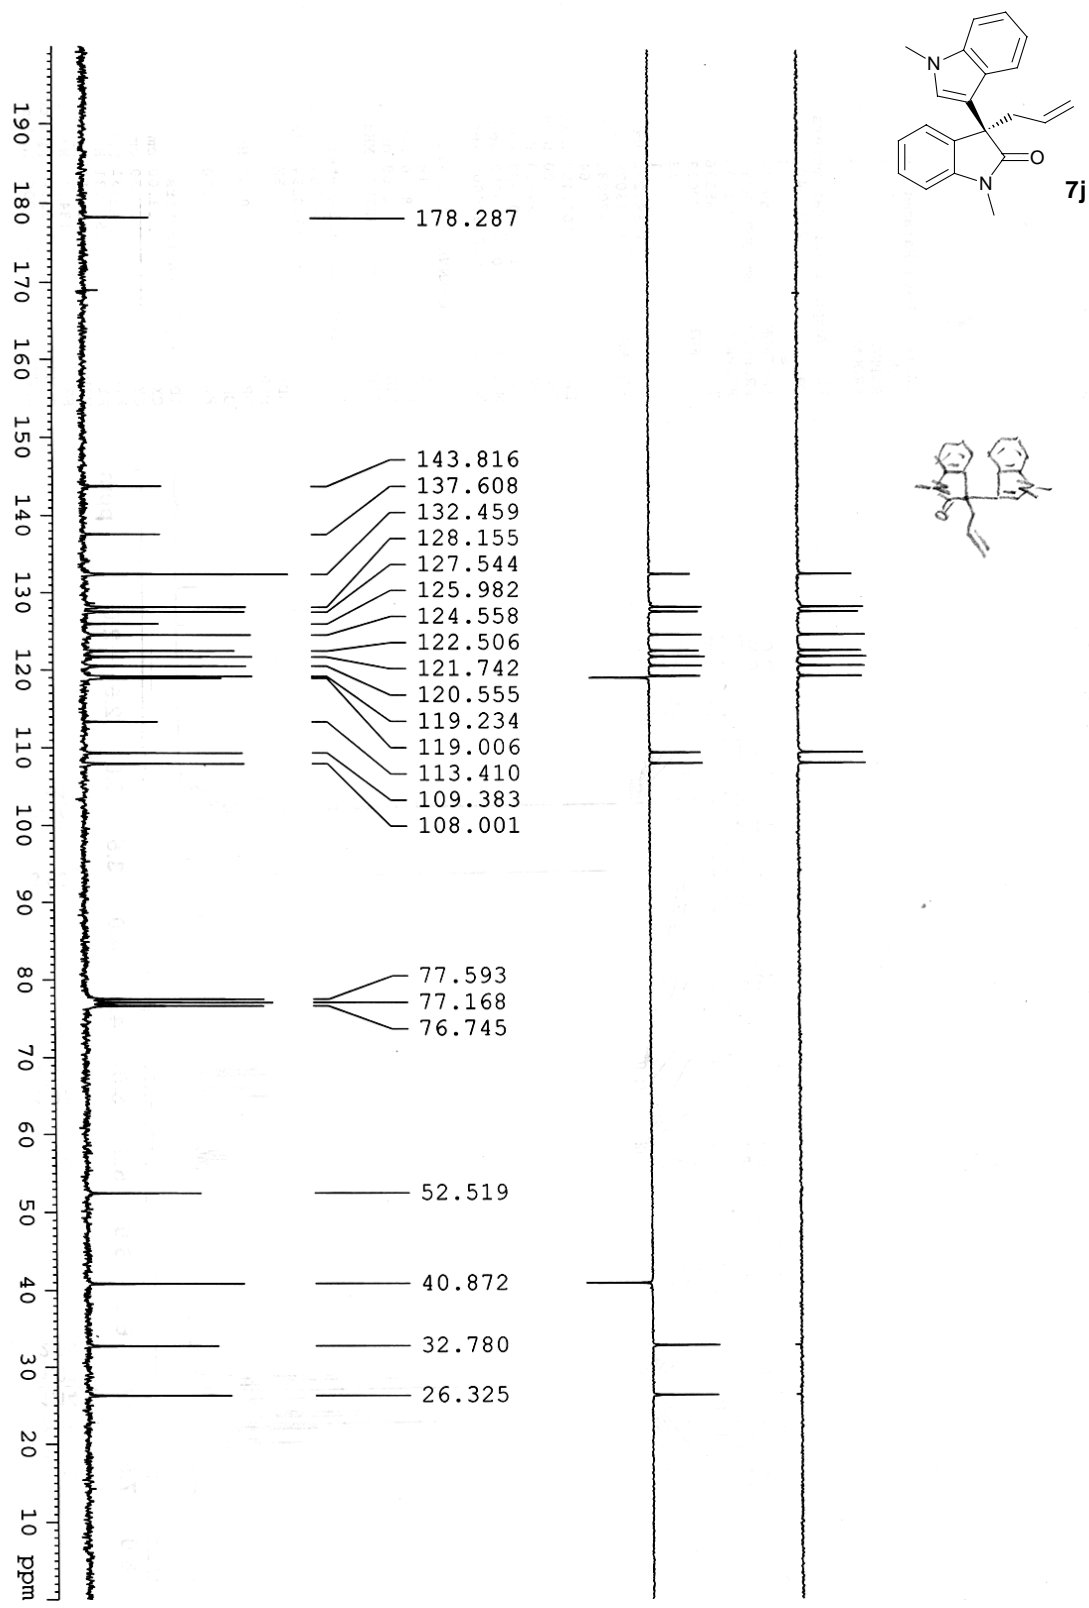

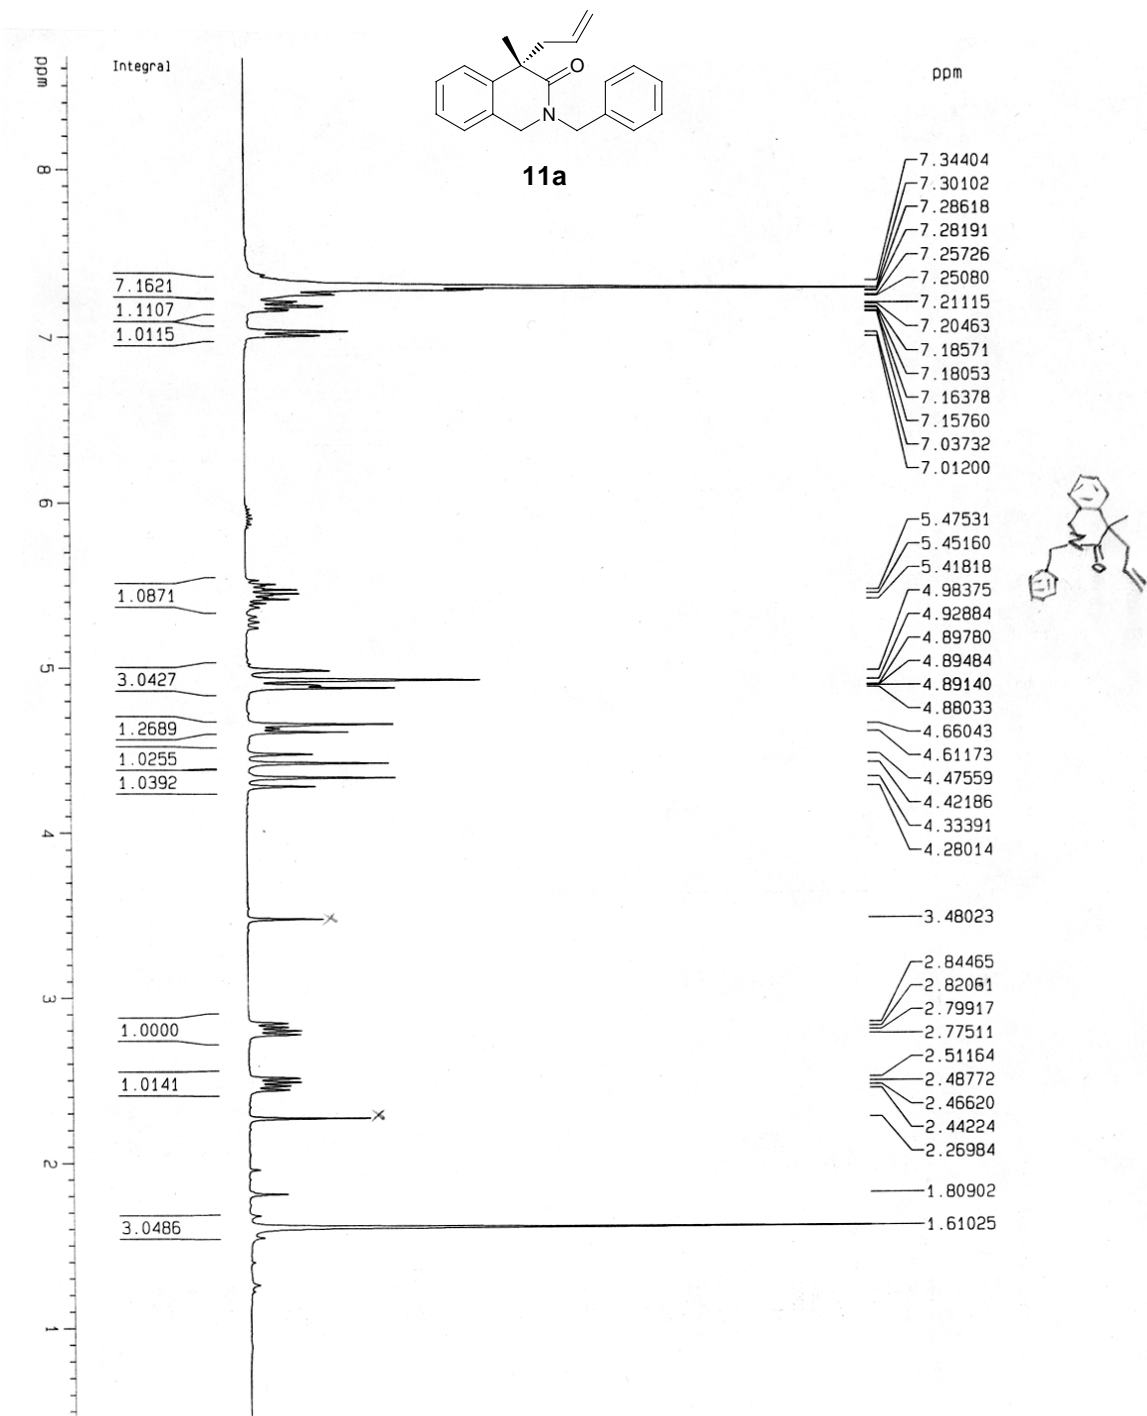

Current Data Parameters

|        |     |
|--------|-----|
| NAME   | zyy |
| EXPNO  | 551 |
| PROCNO | 1   |

F2 - Acquisition Parameters

|         |                |
|---------|----------------|
| Date_   | 20100315       |
| Time    | 11.09          |
| INSTRUM | av300          |
| PROBHD  | 5 mm QNP 1H/13 |
| PULPROG | zg30           |
| TD      | 65536          |
| SOLVENT | CDCl3          |
| NS      | 16             |
| DS      | 1              |
| SWH     | 4789.272 Hz    |
| FIDRES  | 0.073078 Hz    |
| AQ      | 6.842086 sec   |
| RG      | 128            |
| DM      | 104.400 usec   |
| DE      | 6.00 usec      |
| TE      | 295.7 K        |
| D1      | 1.0000000 sec  |
| RGESST  | 0.0000000 sec  |
| RGESST  | 0.0150000 sec  |

===== CHANNEL f1 =====

|      |                 |
|------|-----------------|
| NUC1 | 1H              |
| PT   | 8.60 usec       |
| PL1  | -2.00 dB        |
| SFO1 | 300.1321009 MHz |

F2 - Processing parameters

|     |                |
|-----|----------------|
| SI  | 32768          |
| SF  | 300.130089 MHz |
| WDW | EM             |
| SSB | 0              |
| LB  | 0.30 Hz        |
| GB  | 0              |
| PC  | 1.00           |

1D NMR plot parameters

|       |                 |
|-------|-----------------|
| CK    | 23.00 cm        |
| CV    | 12.50 cm        |
| F1P   | 8.671 ppm       |
| F1    | 2602.46 Hz      |
| F2P   | 0.469 ppm       |
| F2    | 140.74 Hz       |
| PPMCM | 0.35662 ppm/cm  |
| HZCM  | 107.03134 Hz/cm |

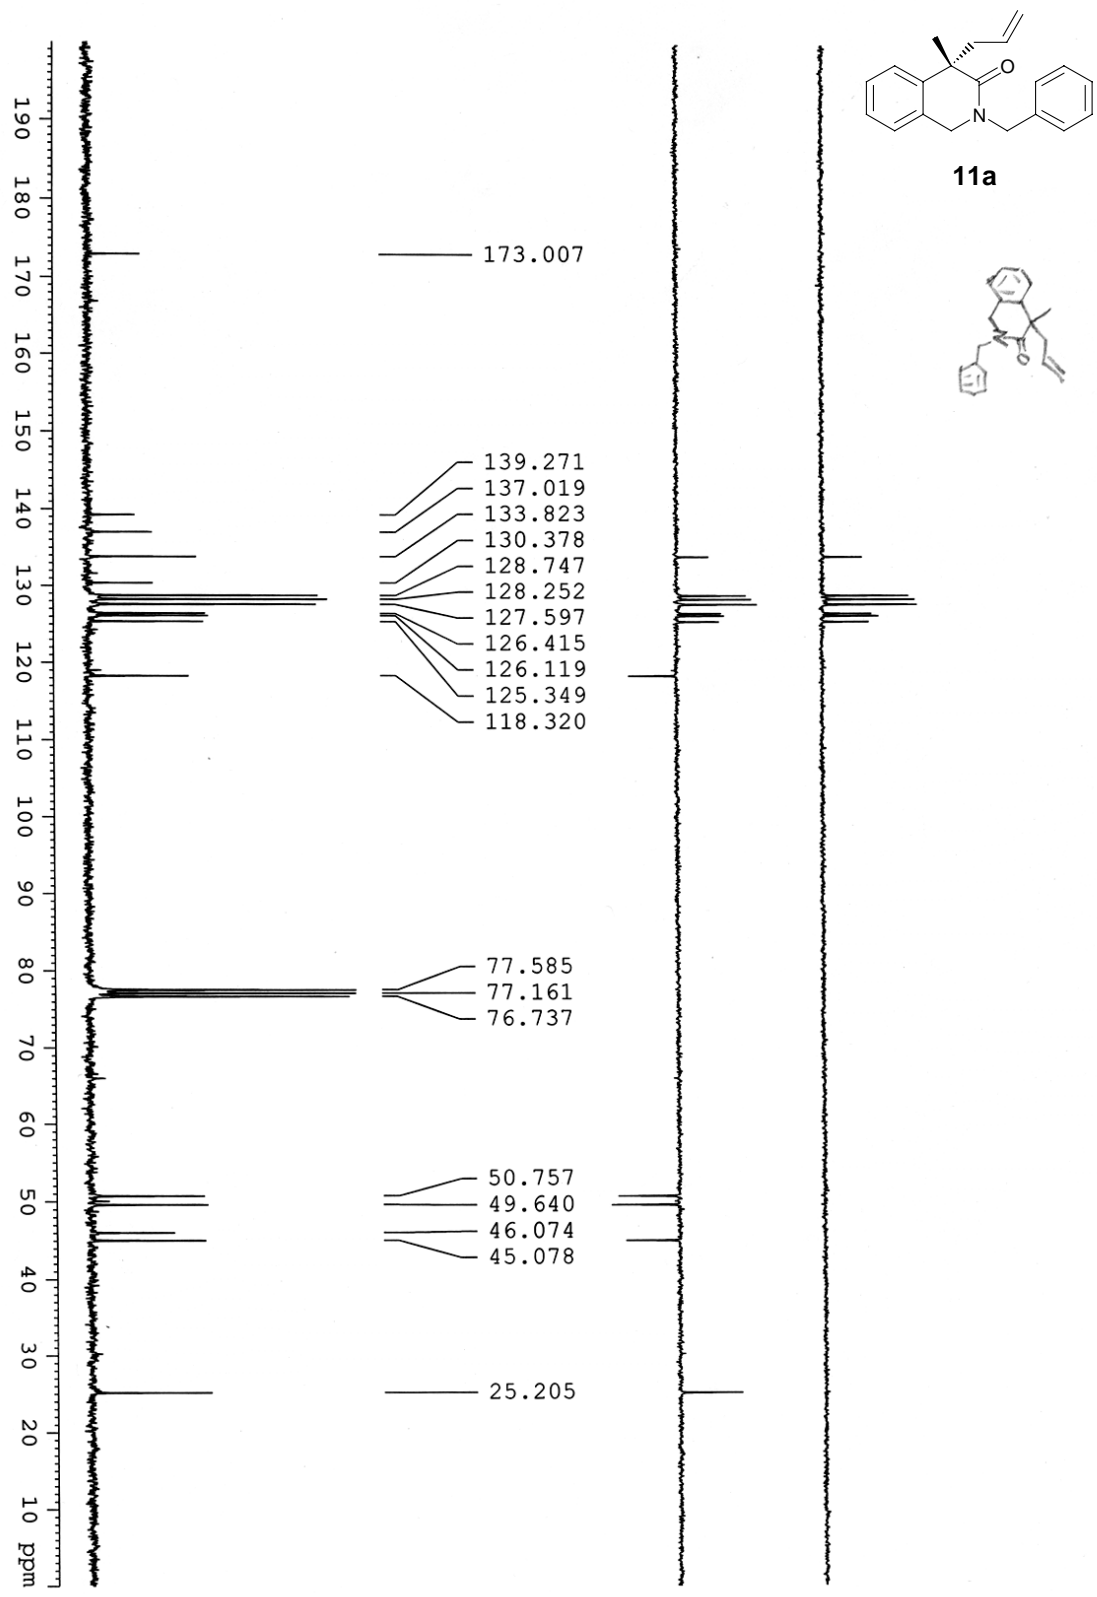

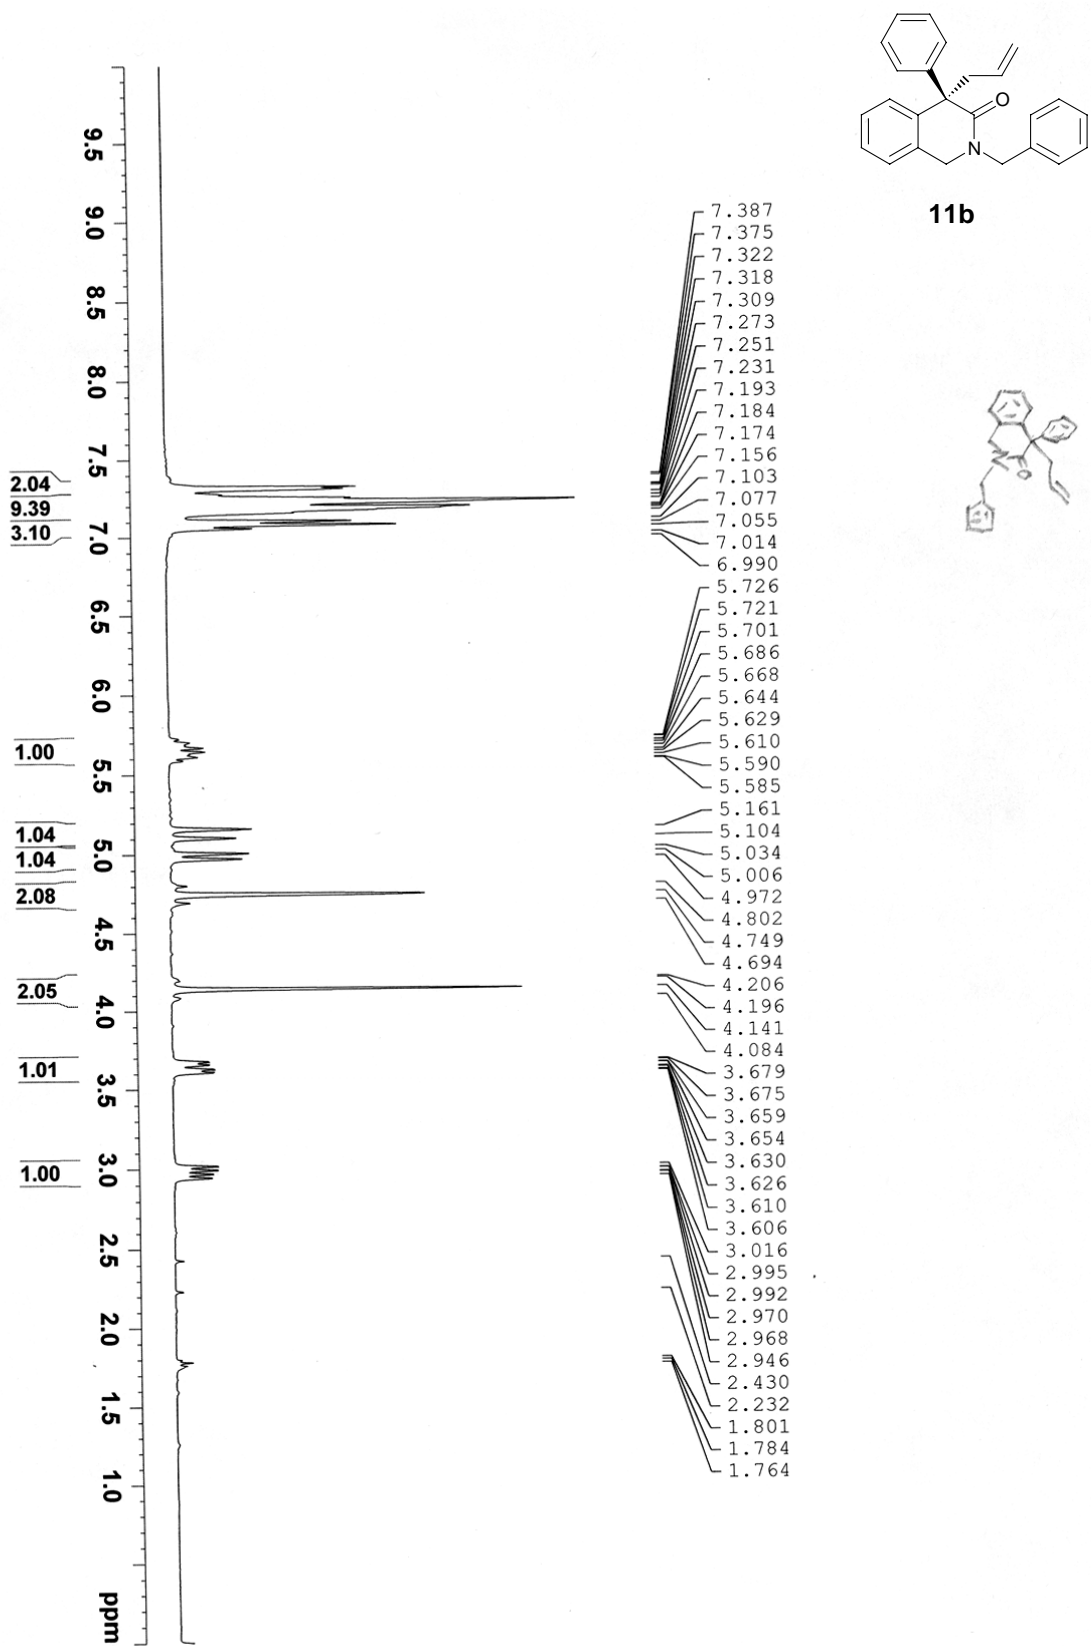

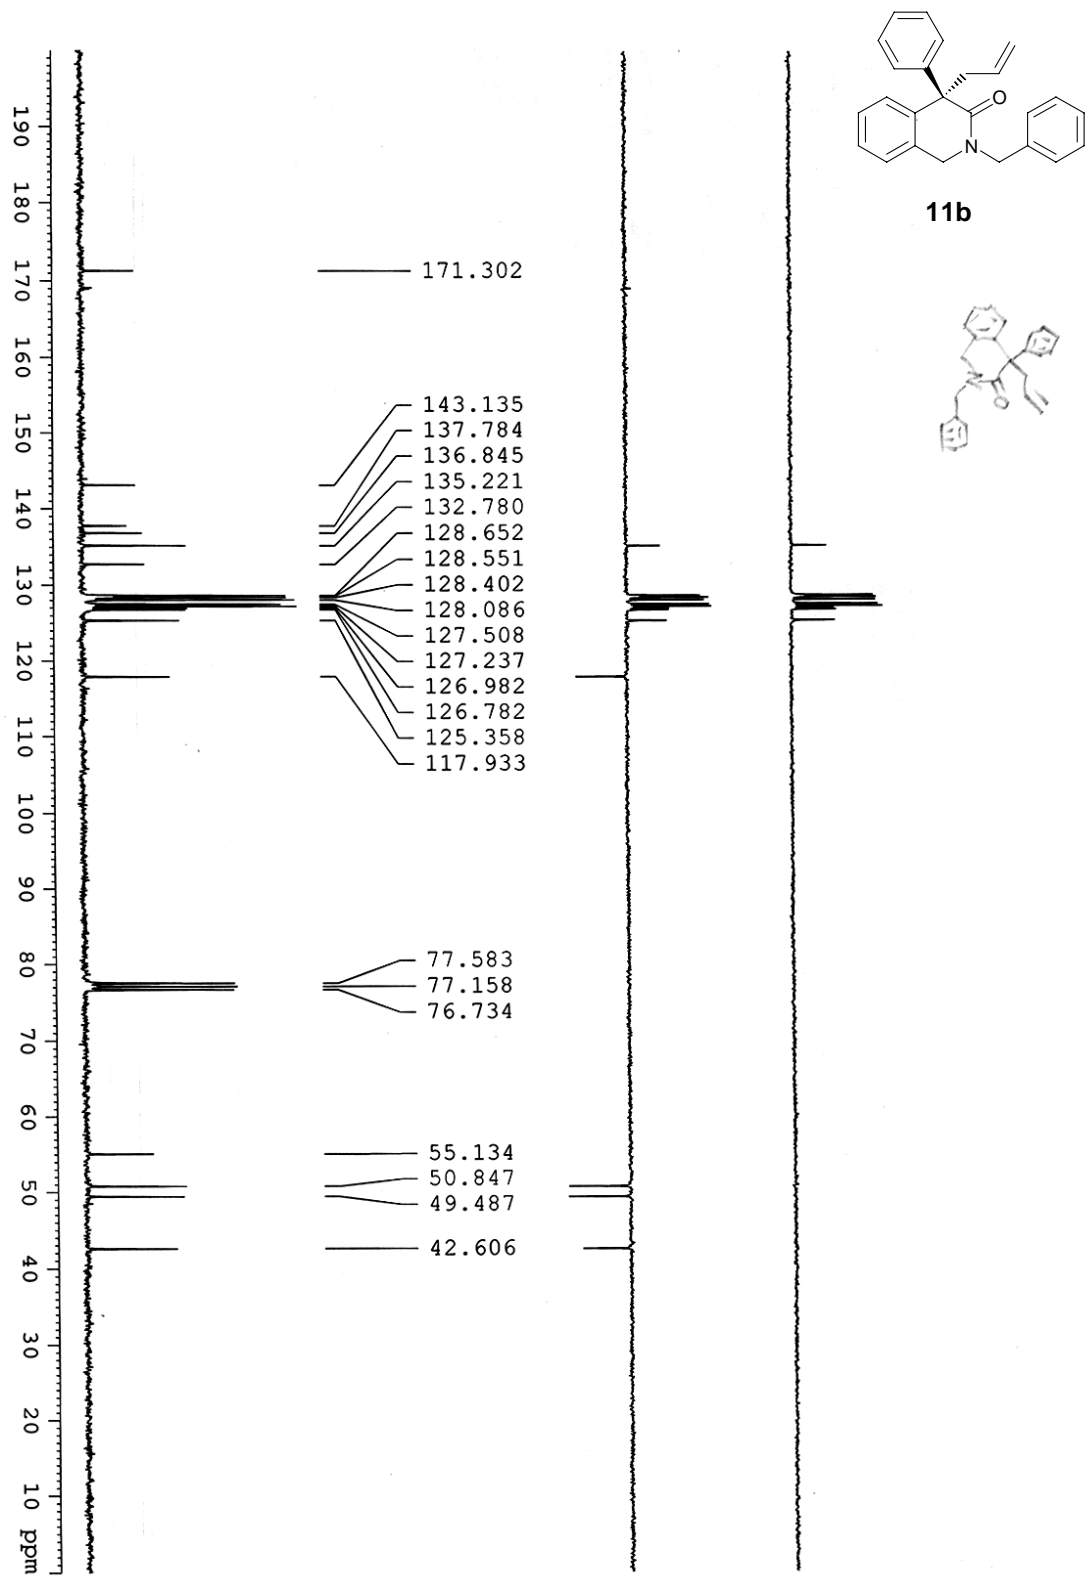

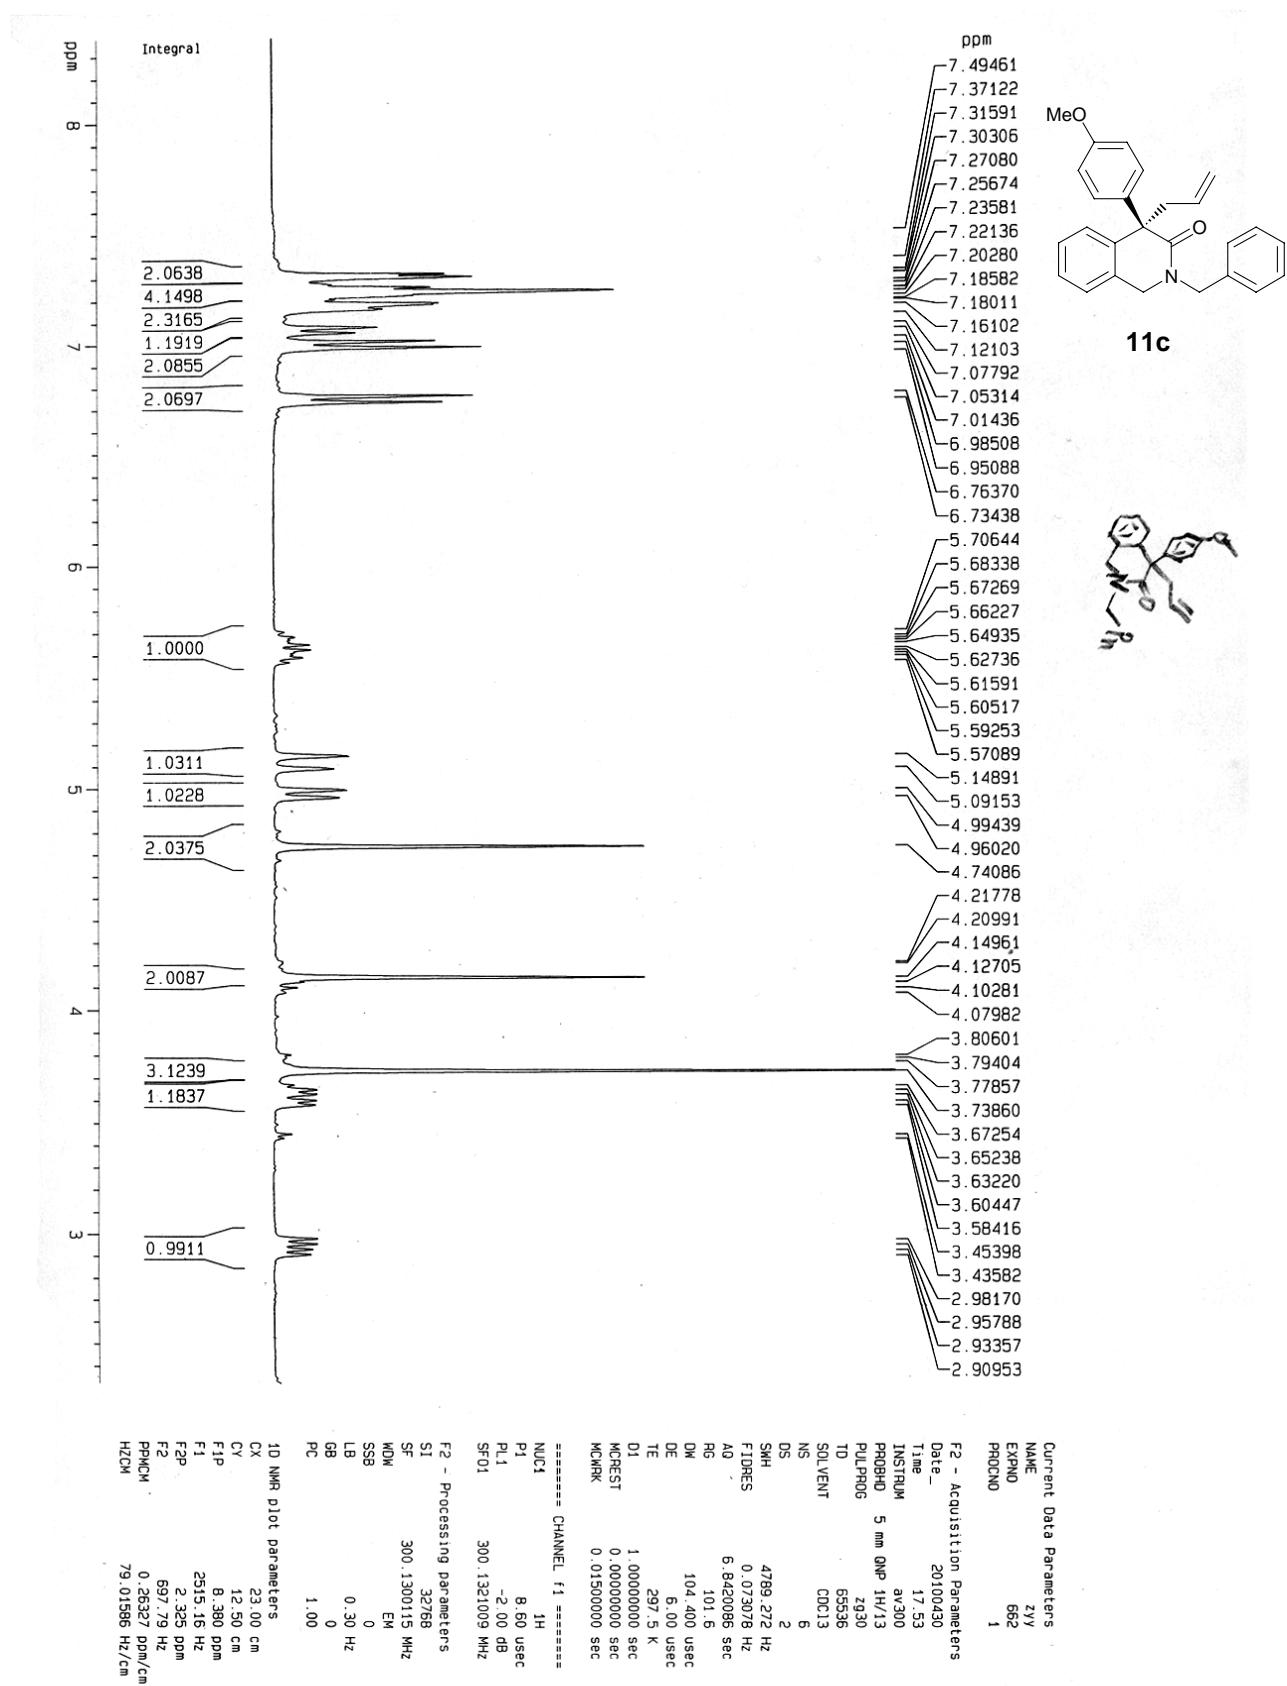

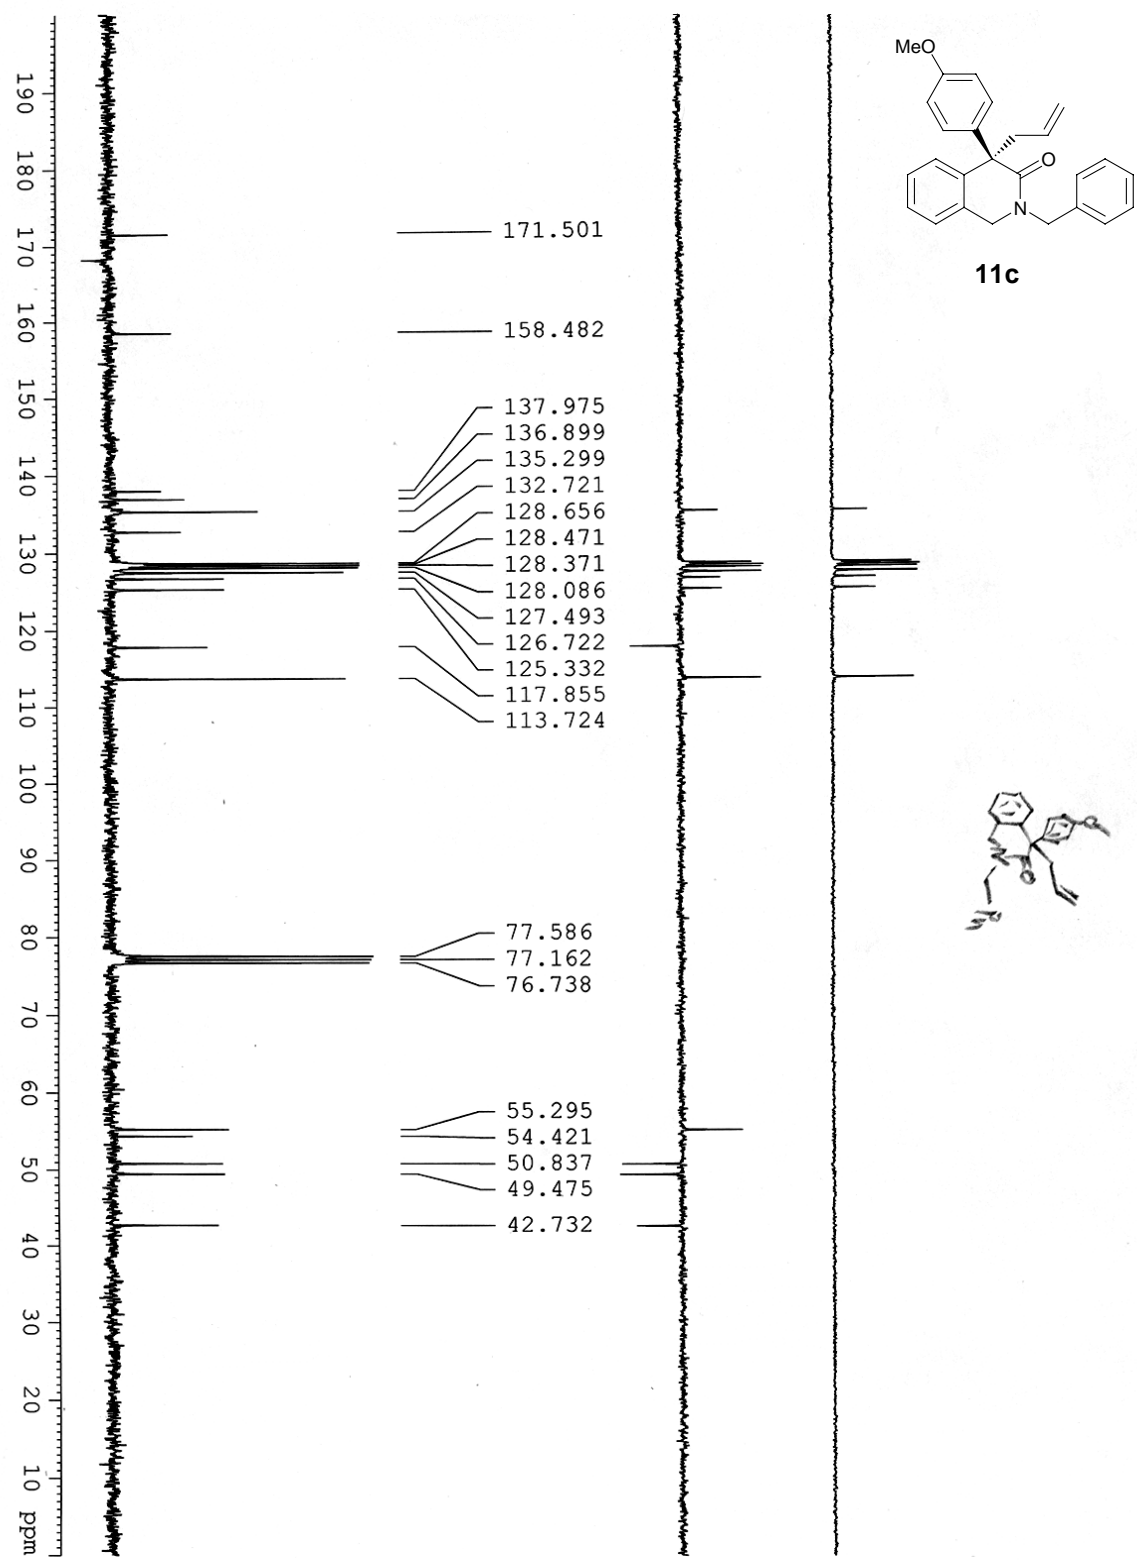



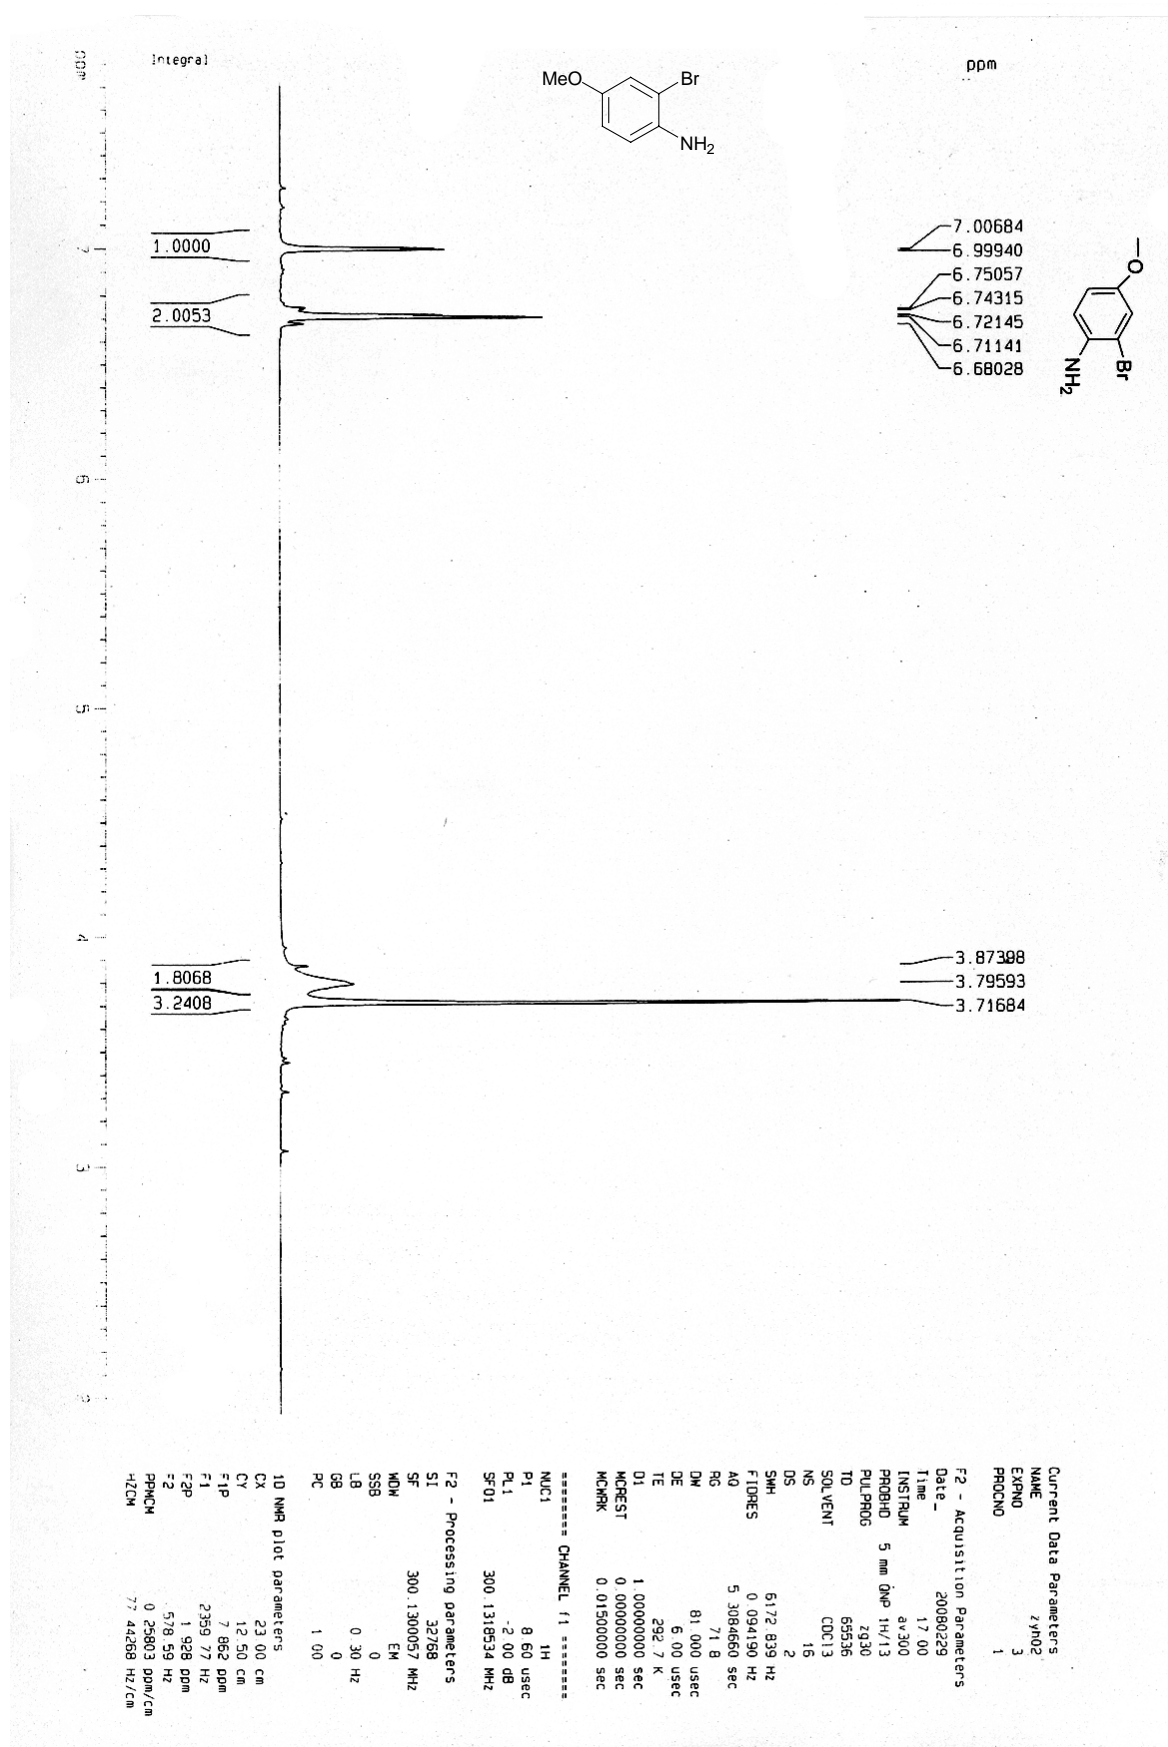



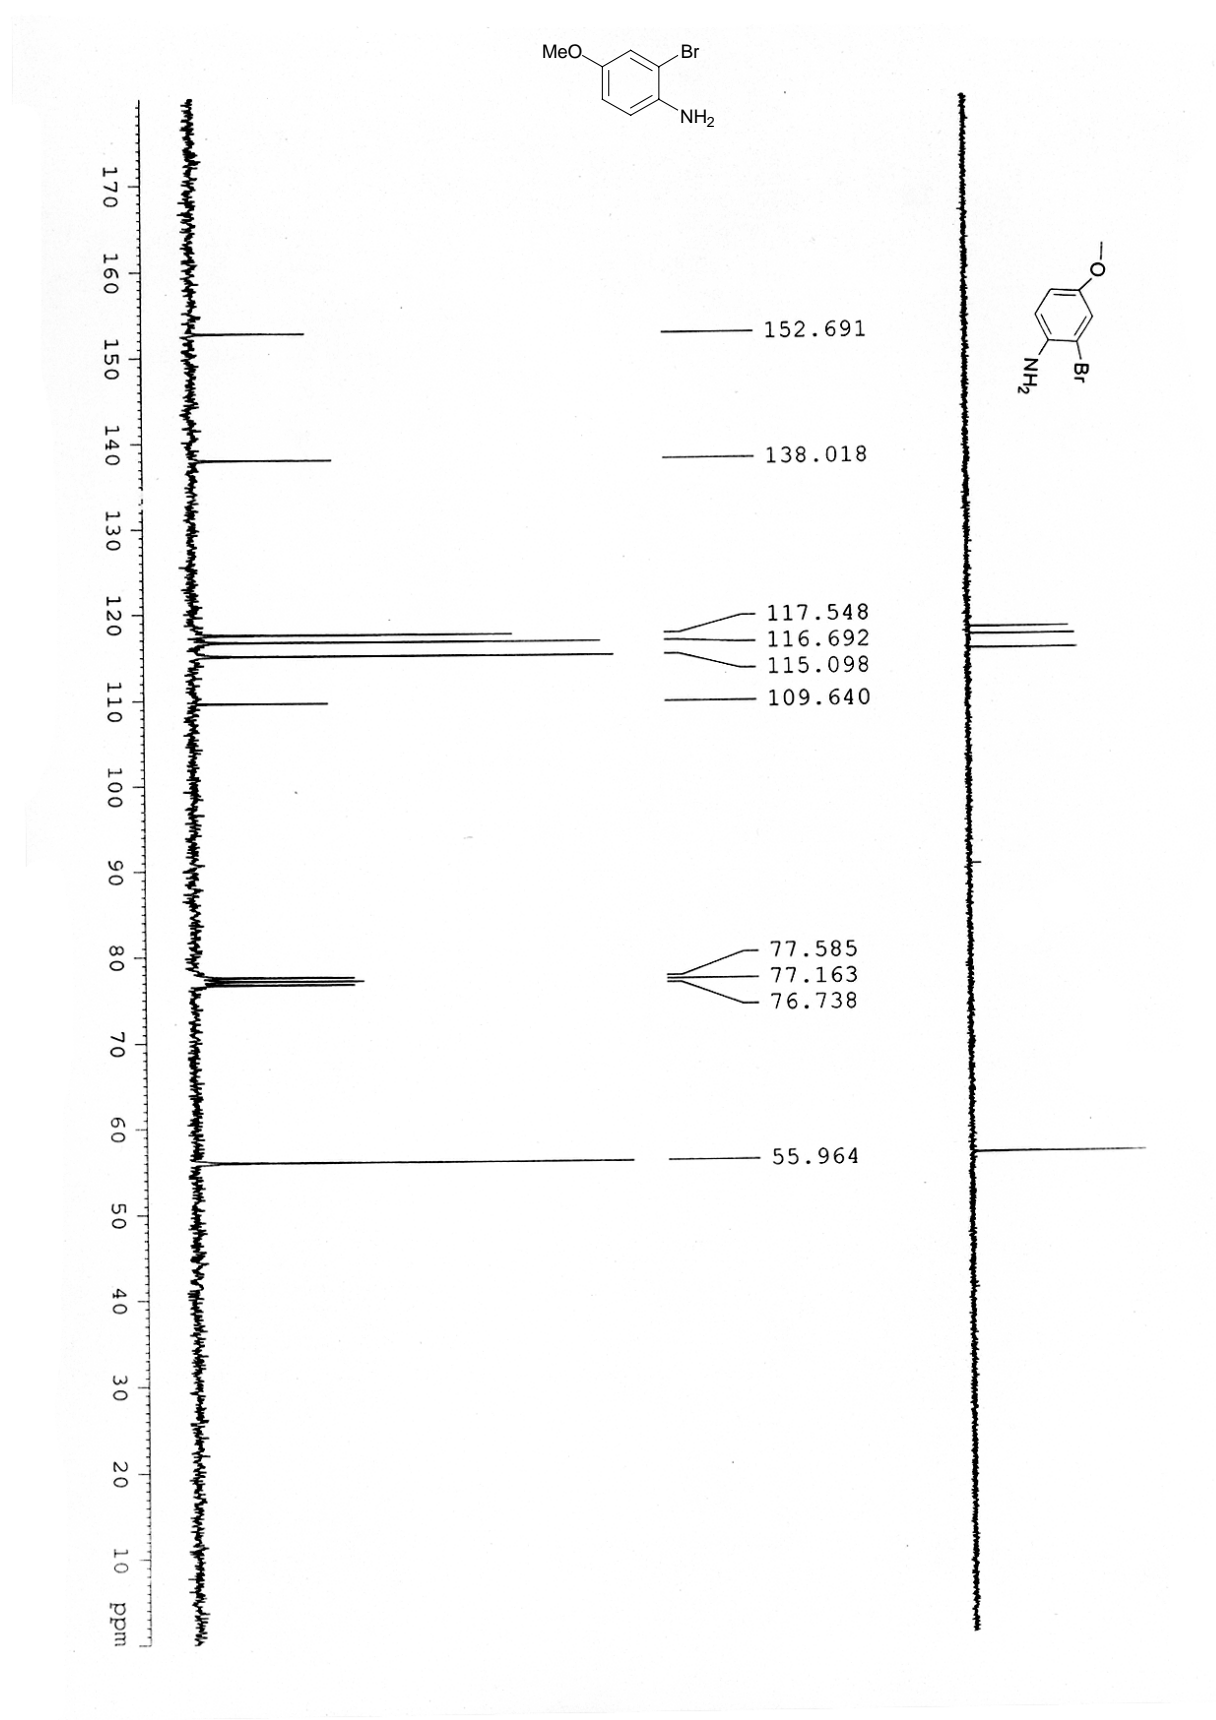

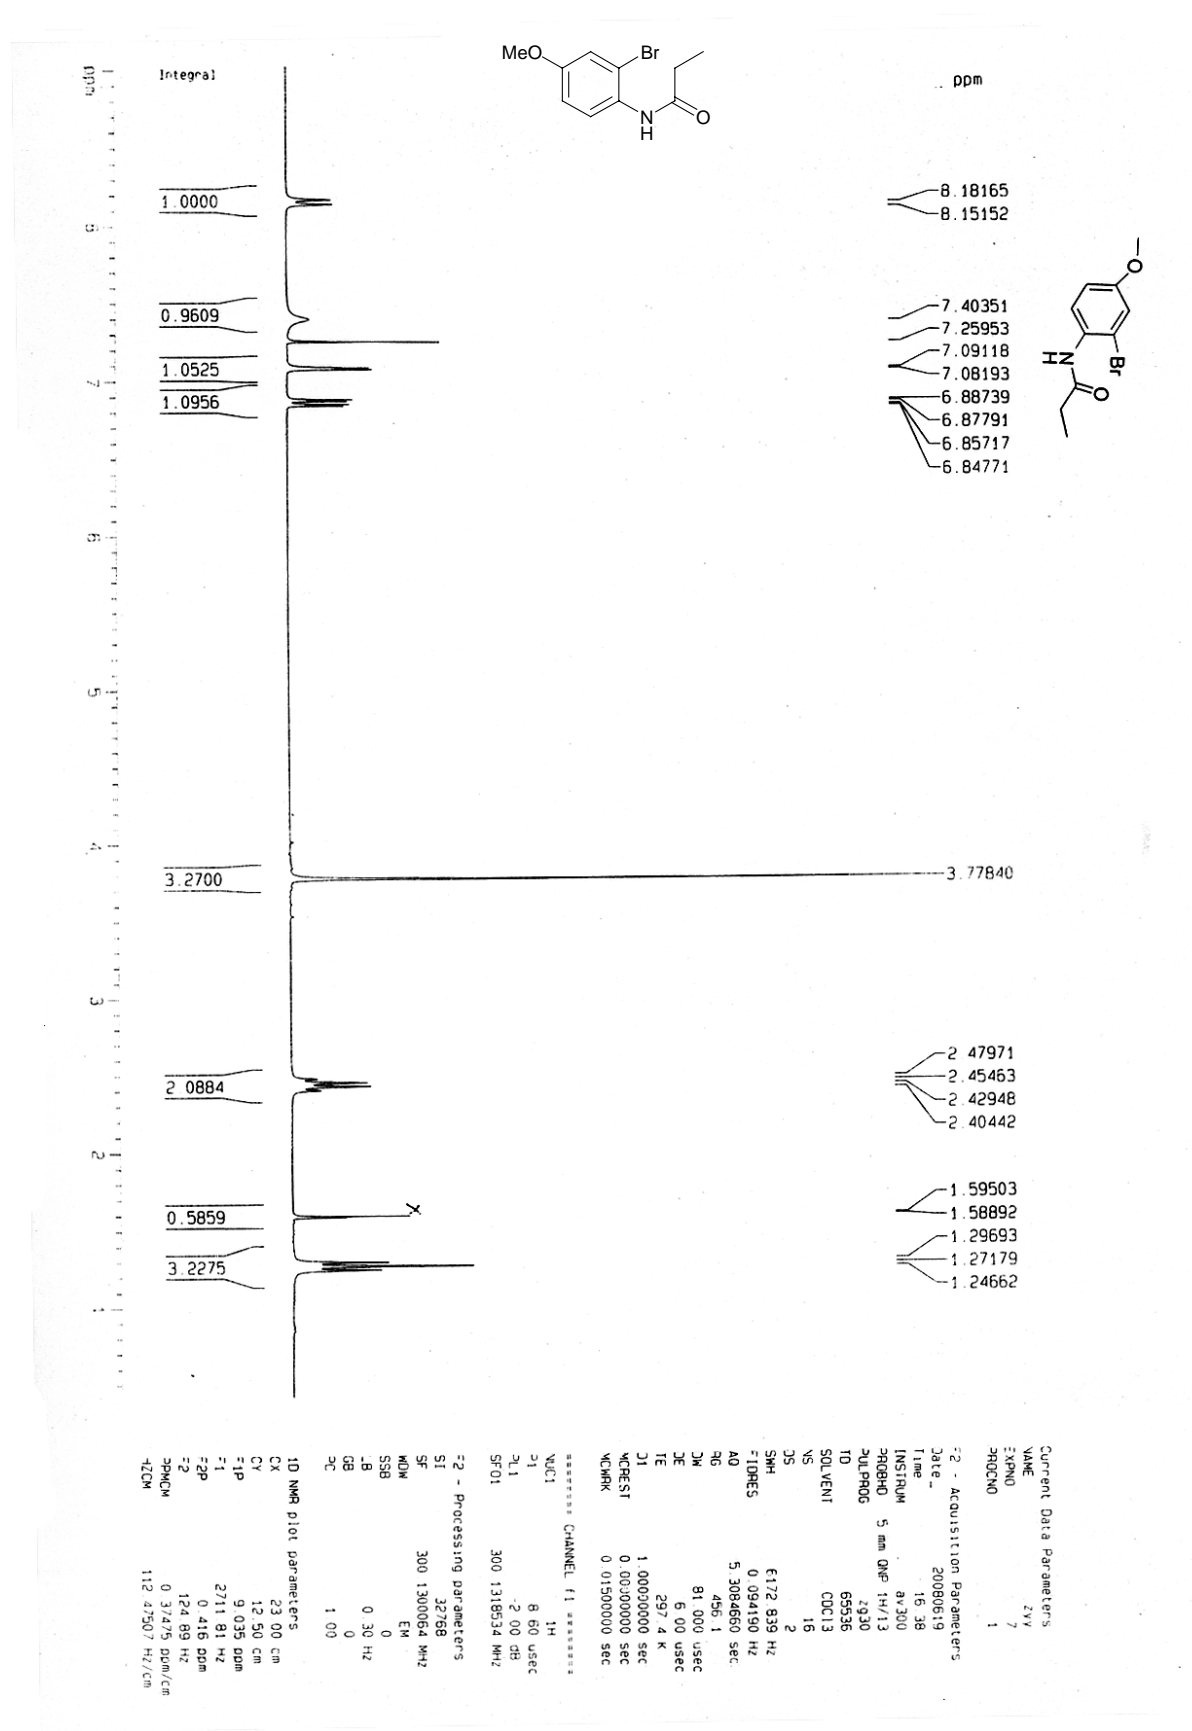

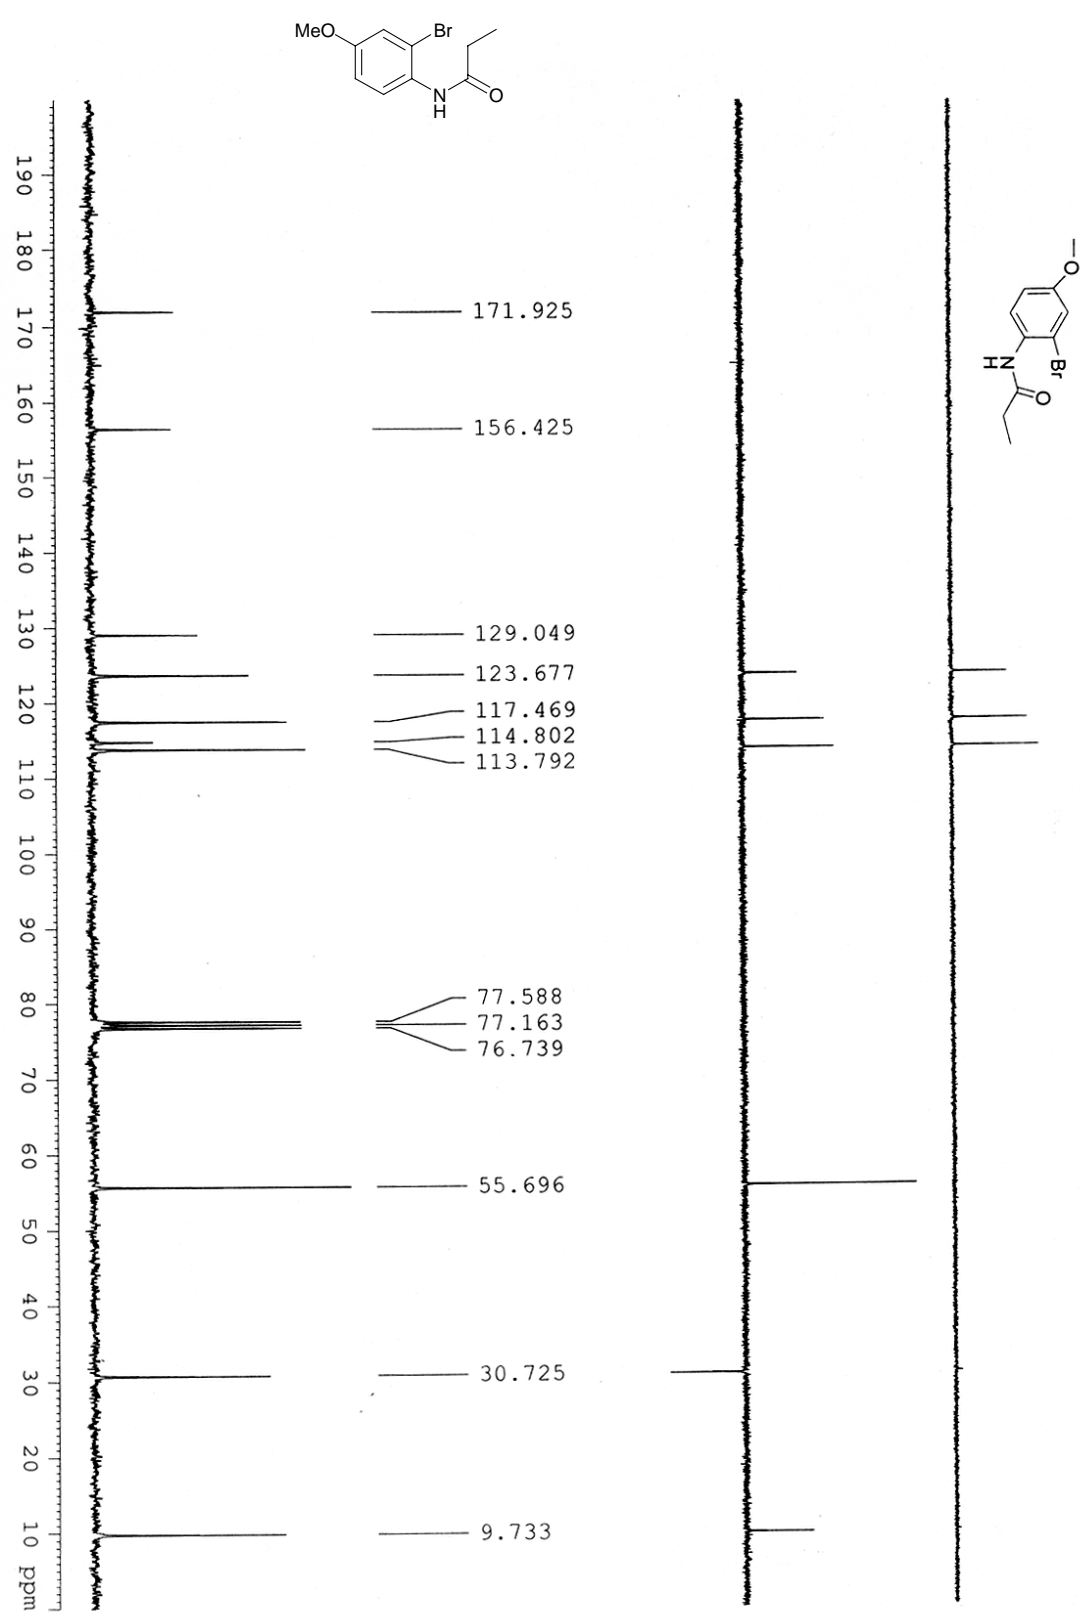

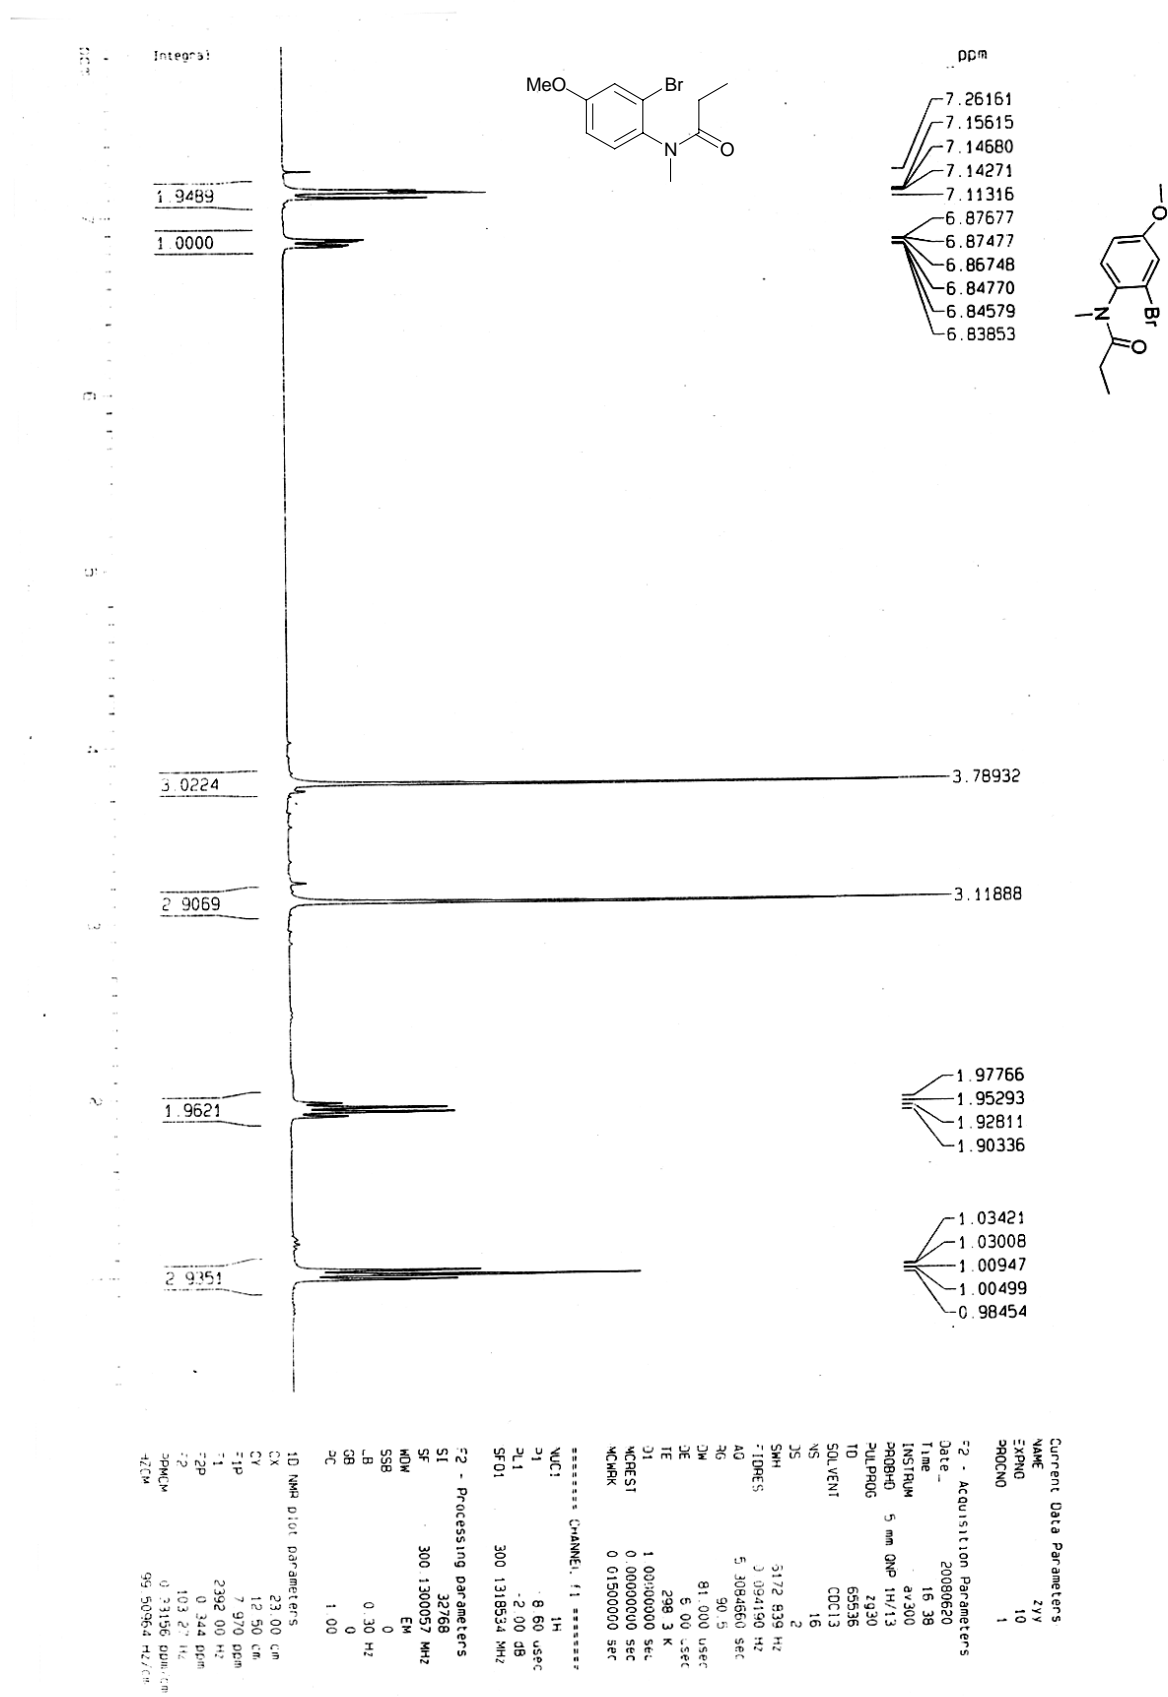

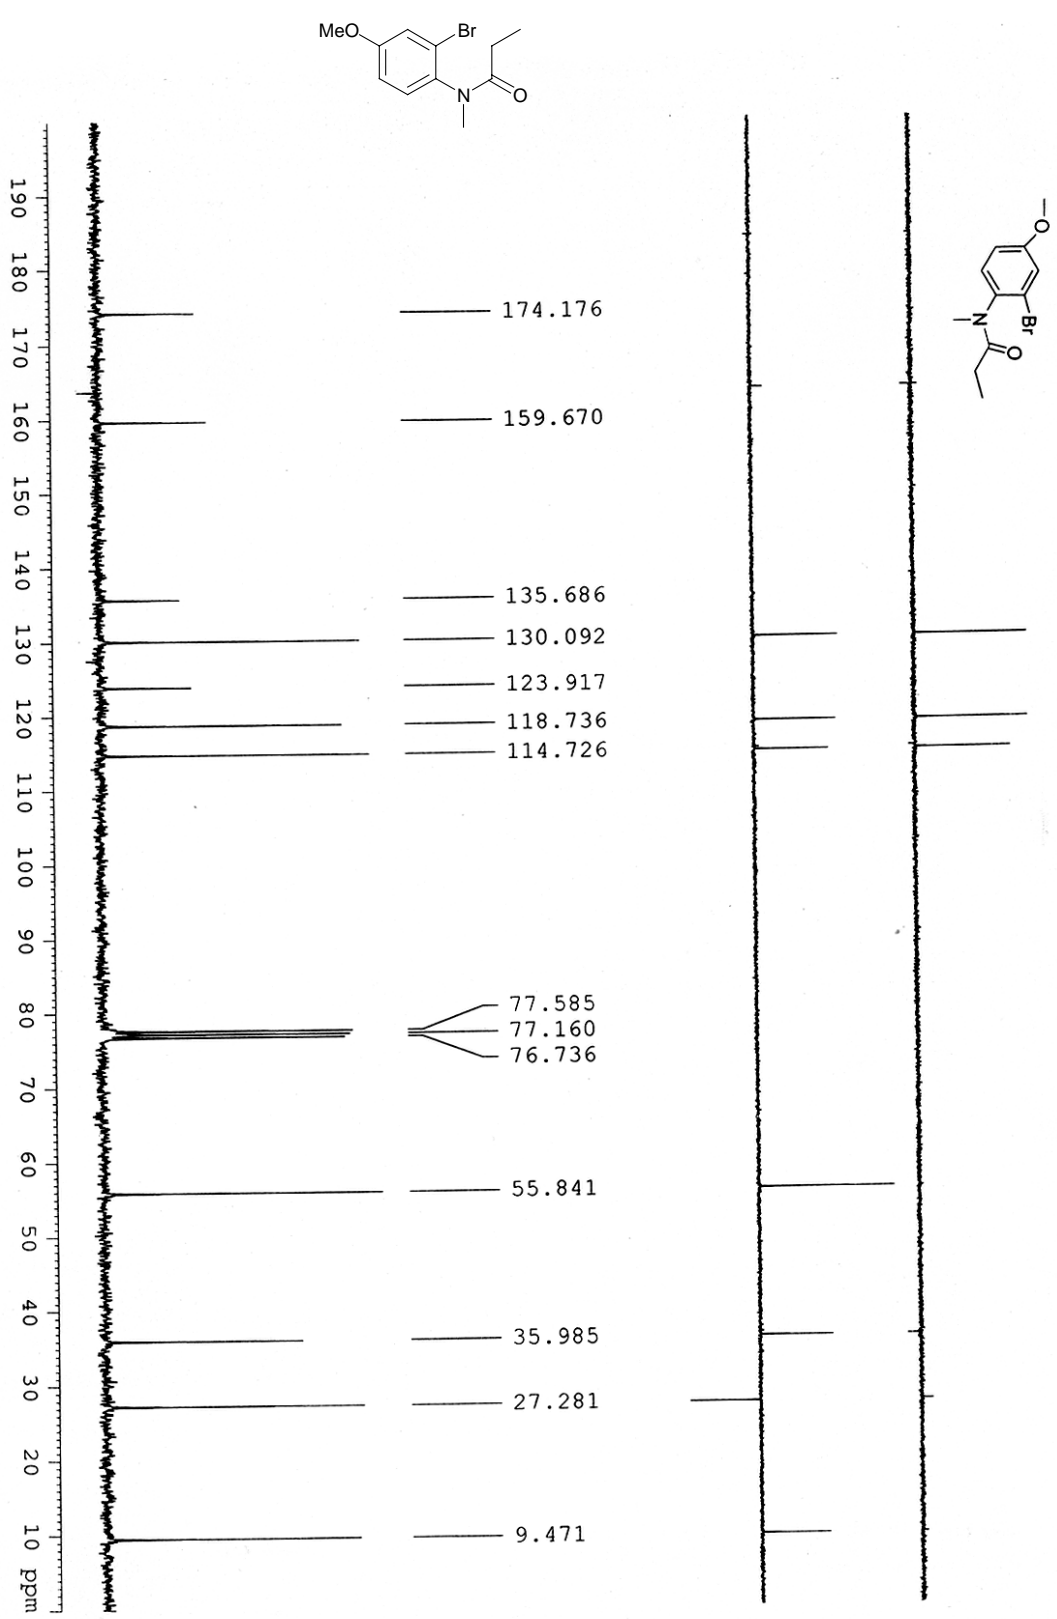

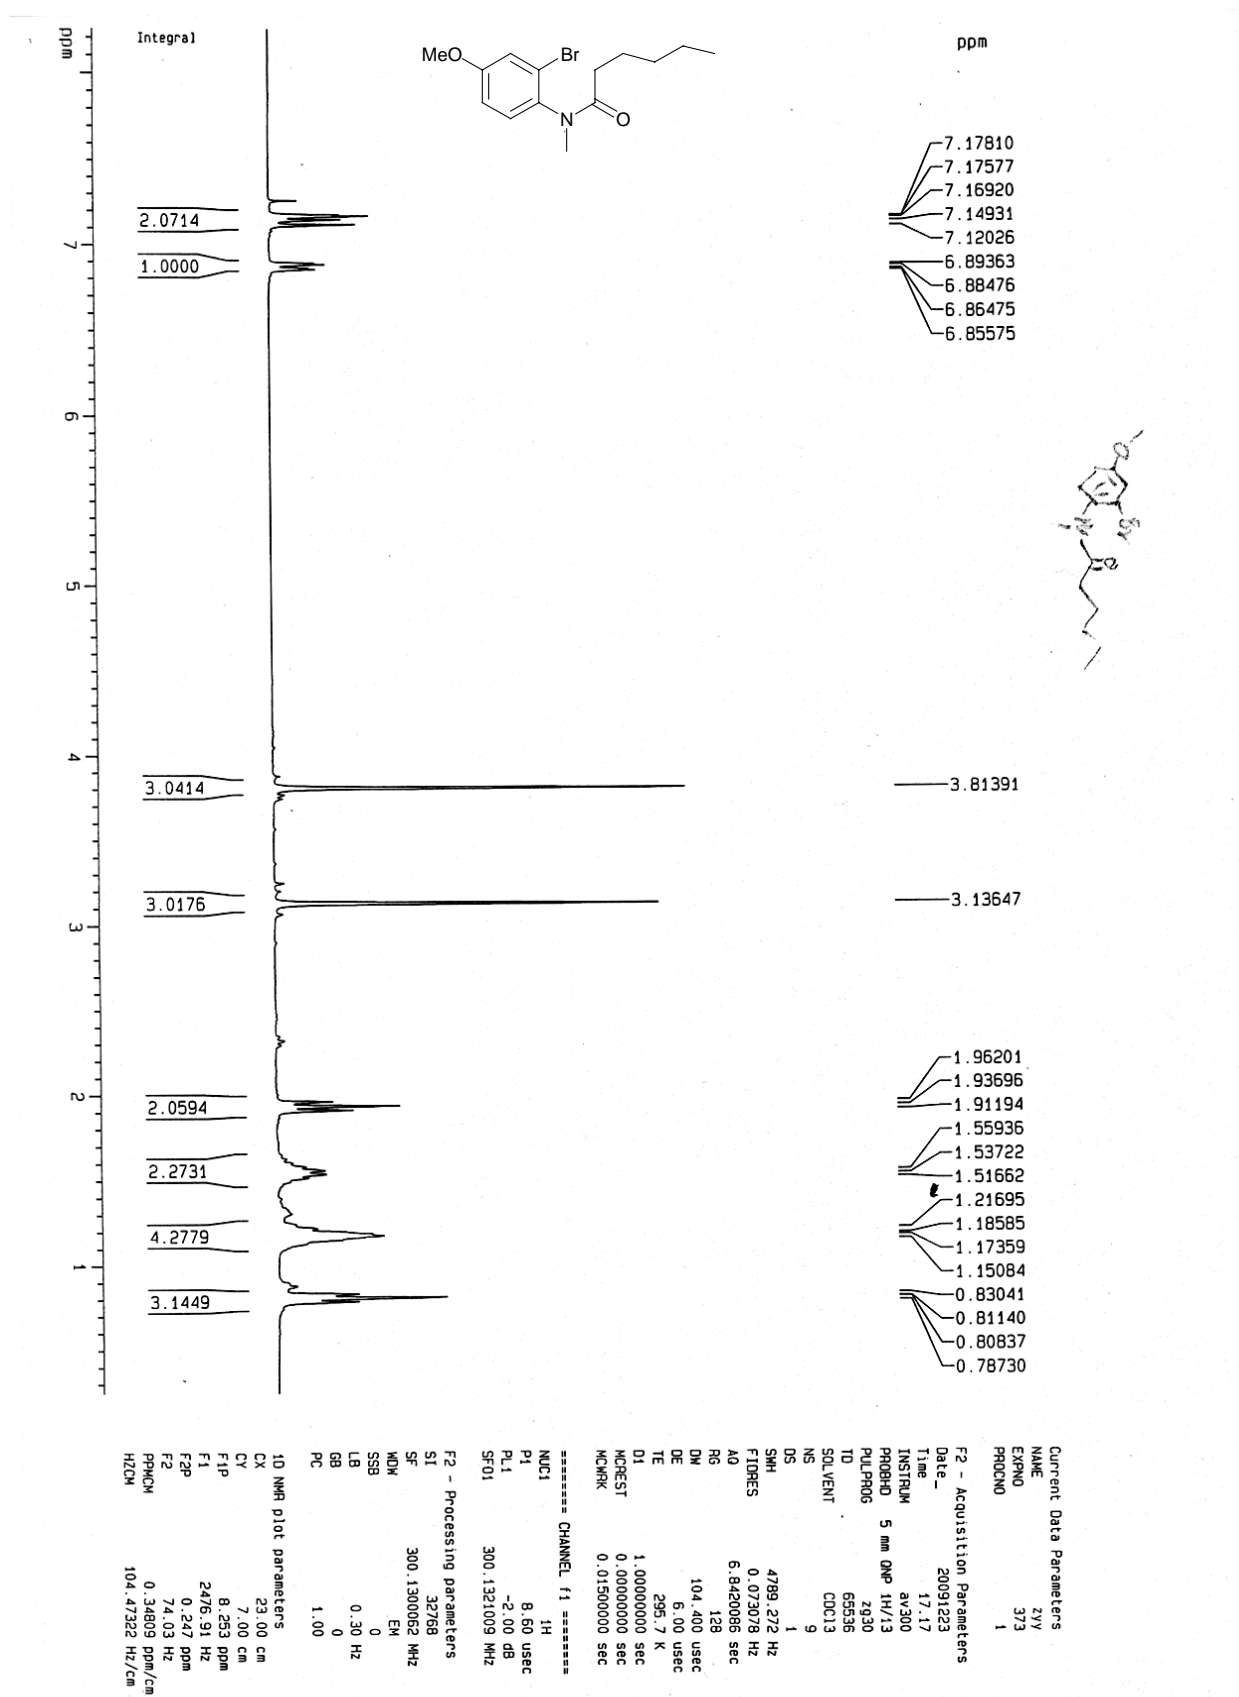



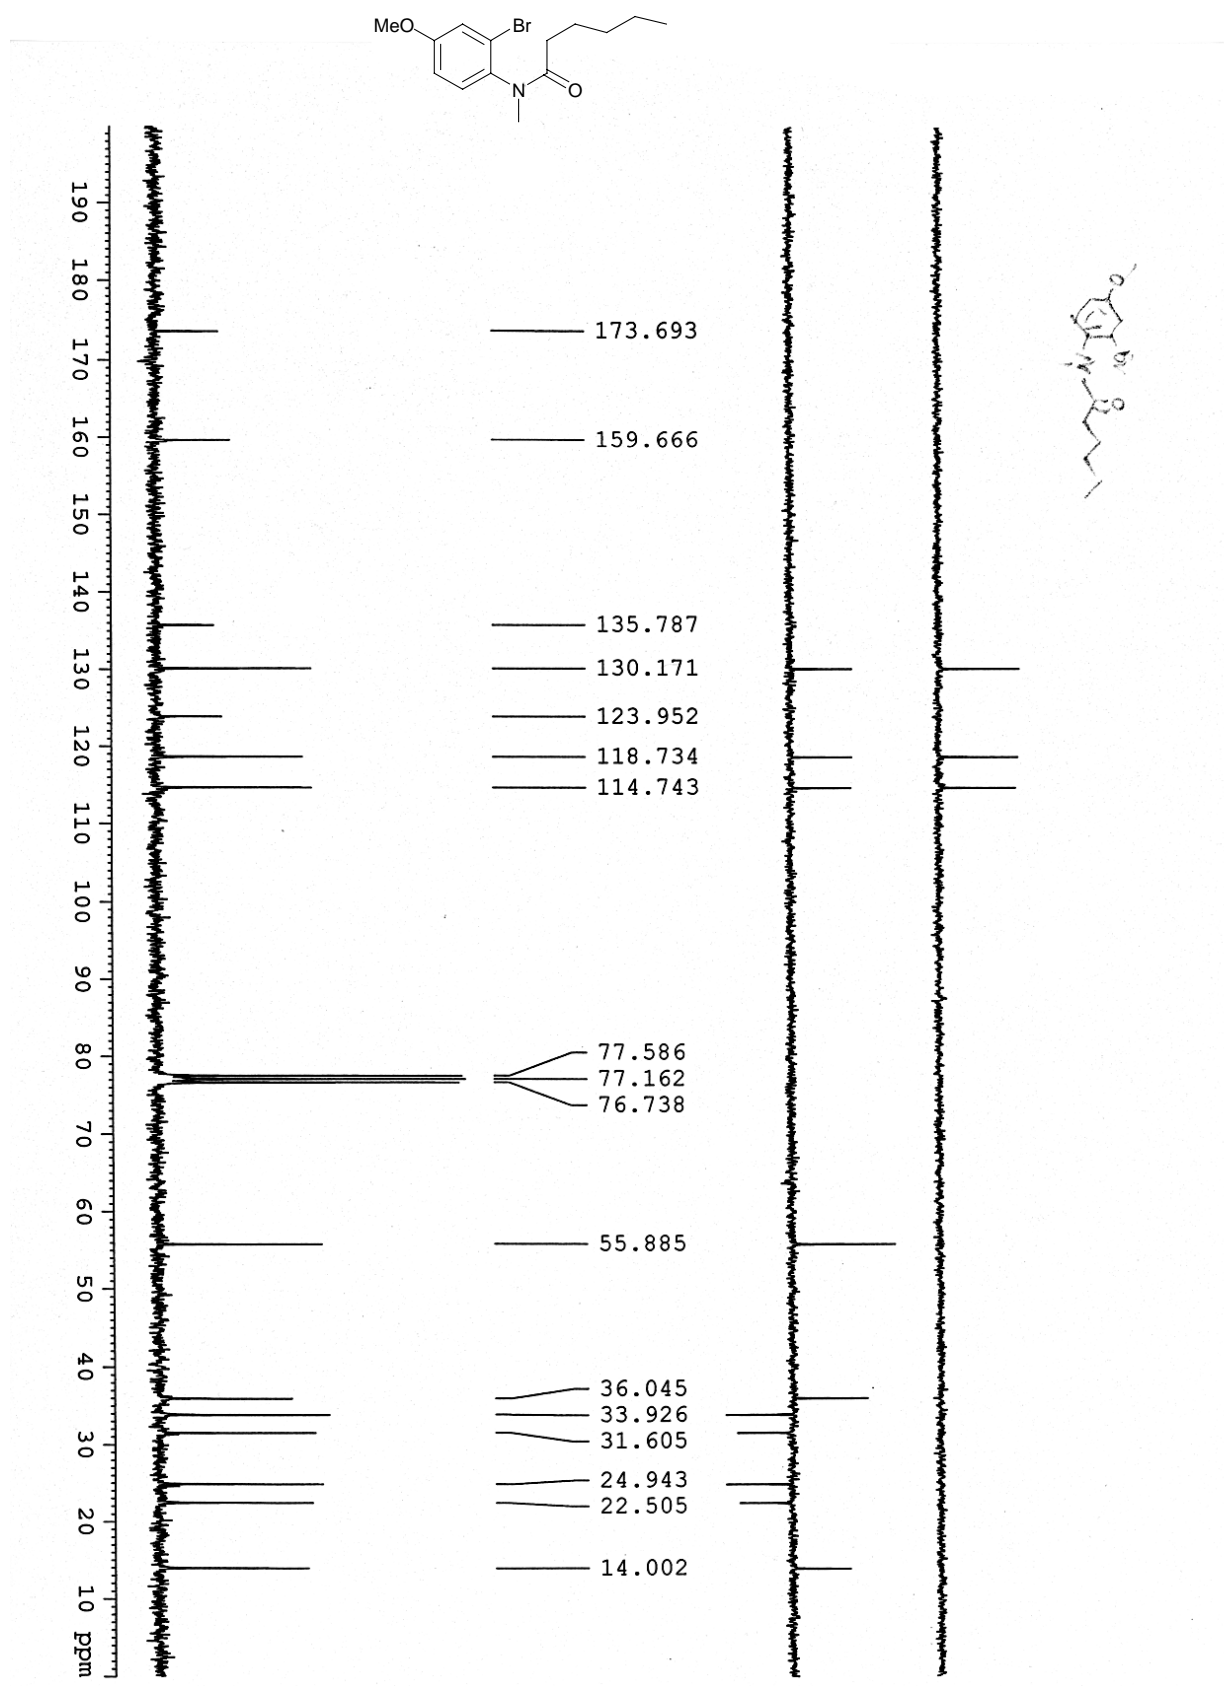

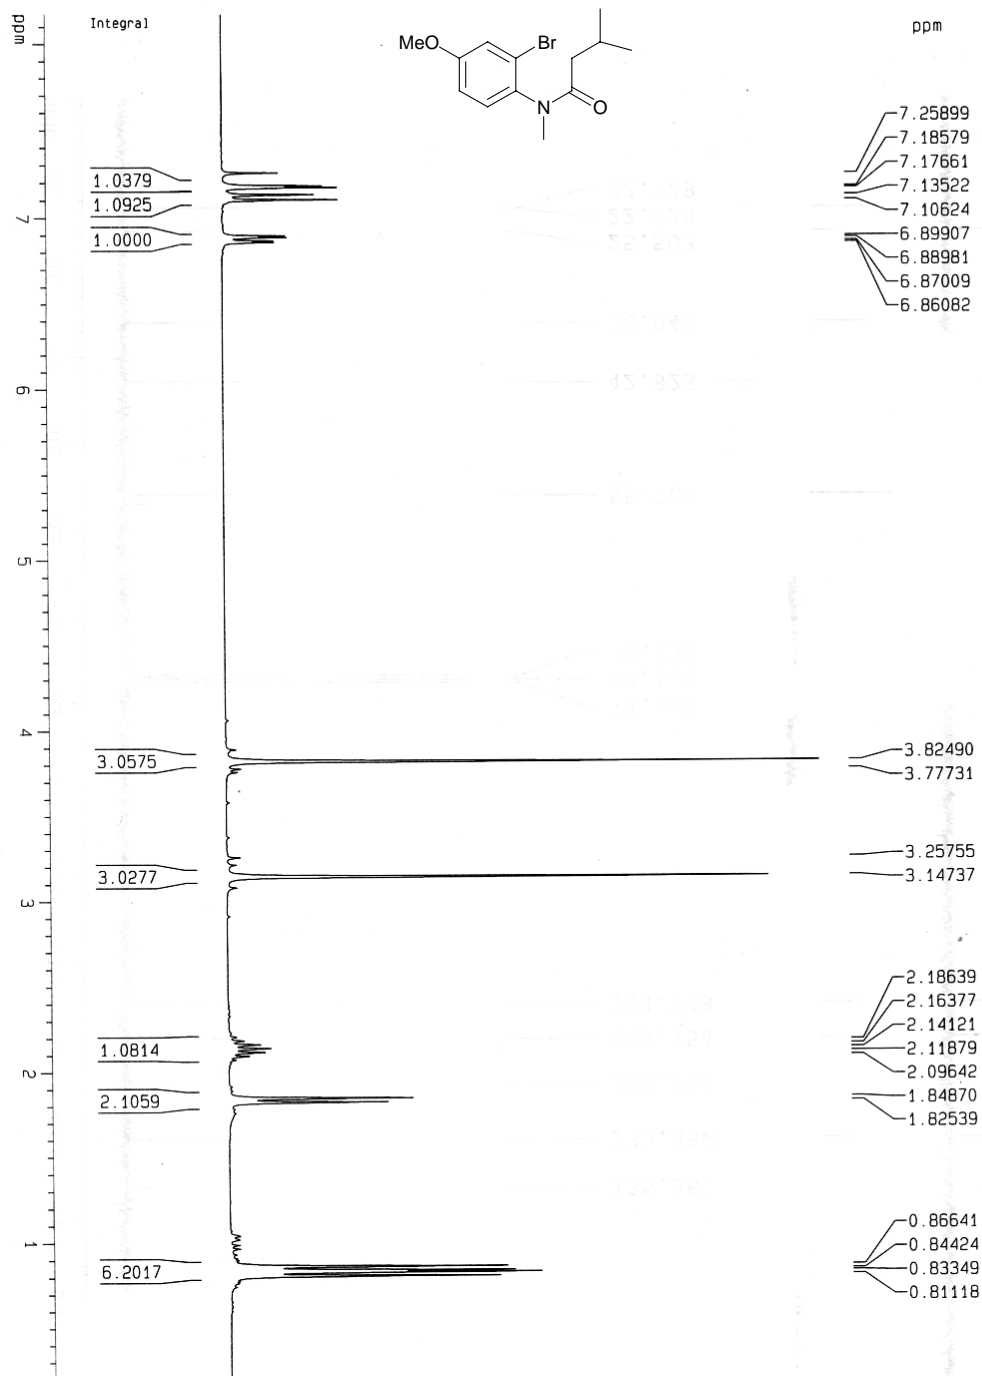

Current Data Parameters

|        |     |
|--------|-----|
| NAME   | zyv |
| EXPNO  | 369 |
| PROCNO | 1   |

F2 - Acquisition Parameters

|         |                |
|---------|----------------|
| Date_   | 20091222       |
| Time    | 18.47          |
| INSTRUM | av300          |
| PROBHD  | 5 mm QNP 1H/13 |
| PULPROG | zg30           |
| TD      | 65536          |
| SOLVENT | CDCl3          |
| NS      | 7              |
| DS      | 1              |
| SWH     | 4789.272 Hz    |
| FIDRES  | 0.073078 Hz    |
| AQ      | 6.8420086 sec  |
| RG      | 256            |
| DW      | 104.400 usec   |
| DE      | 6.00 usec      |
| TE      | 295.3 K        |
| D1      | 1.00000000 sec |
| MCREST  | 0.00000000 sec |
| MCNRC   | 0.01500000 sec |

===== CHANNEL f1 =====

|      |                 |
|------|-----------------|
| NUC1 | 1H              |
| P1   | 8.60 usec       |
| PL1  | -2.00 dB        |
| SFO1 | 300.1321009 MHz |

F2 - Processing parameters

|     |                |
|-----|----------------|
| SI  | 32768          |
| SF  | 300.130064 MHz |
| WDW | EM             |
| SSB | 0              |
| LB  | 0.30 Hz        |
| GB  | 0              |
| PC  | 1.00           |

1D NMR plot parameters

|       |                 |
|-------|-----------------|
| CX    | 23.00 cm        |
| CY    | 10.00 cm        |
| F1P   | 8.179 ppm       |
| F1    | 2454.62 Hz      |
| F2P   | 0.209 ppm       |
| F2    | 62.74 Hz        |
| PPMCM | 0.34650 ppm/cm  |
| HZCM  | 103.99509 Hz/cm |



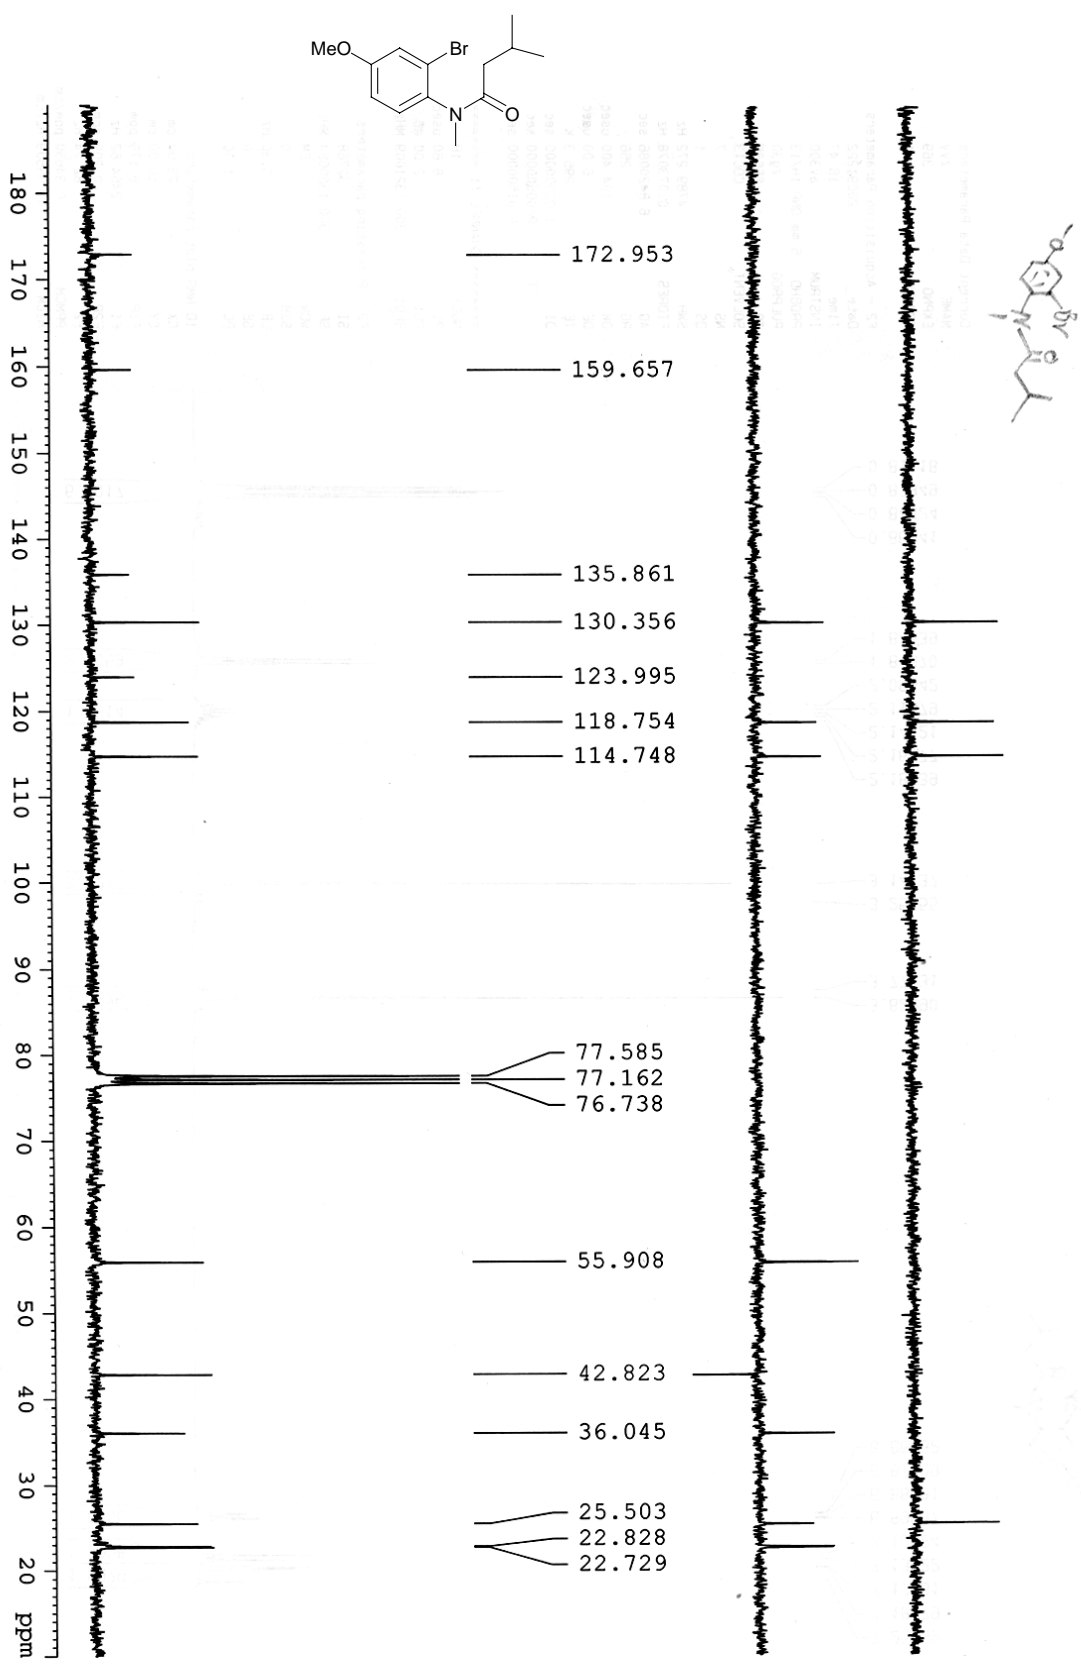

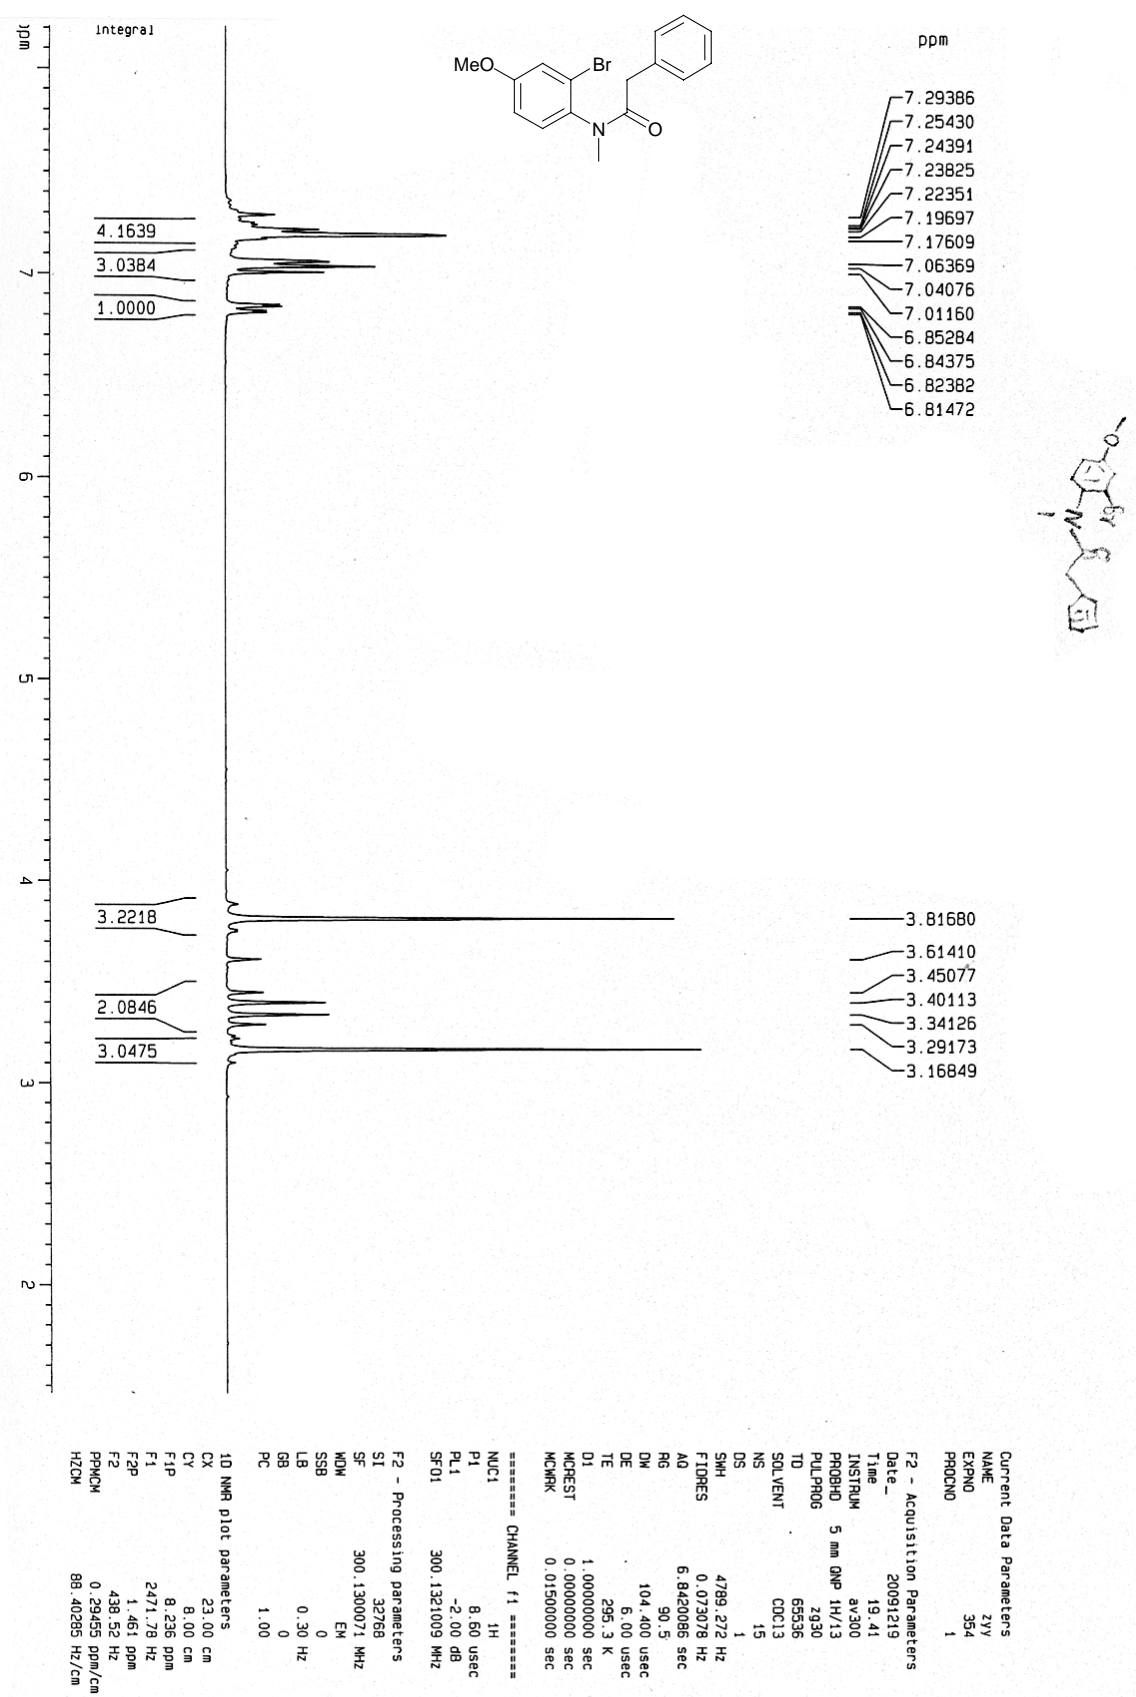

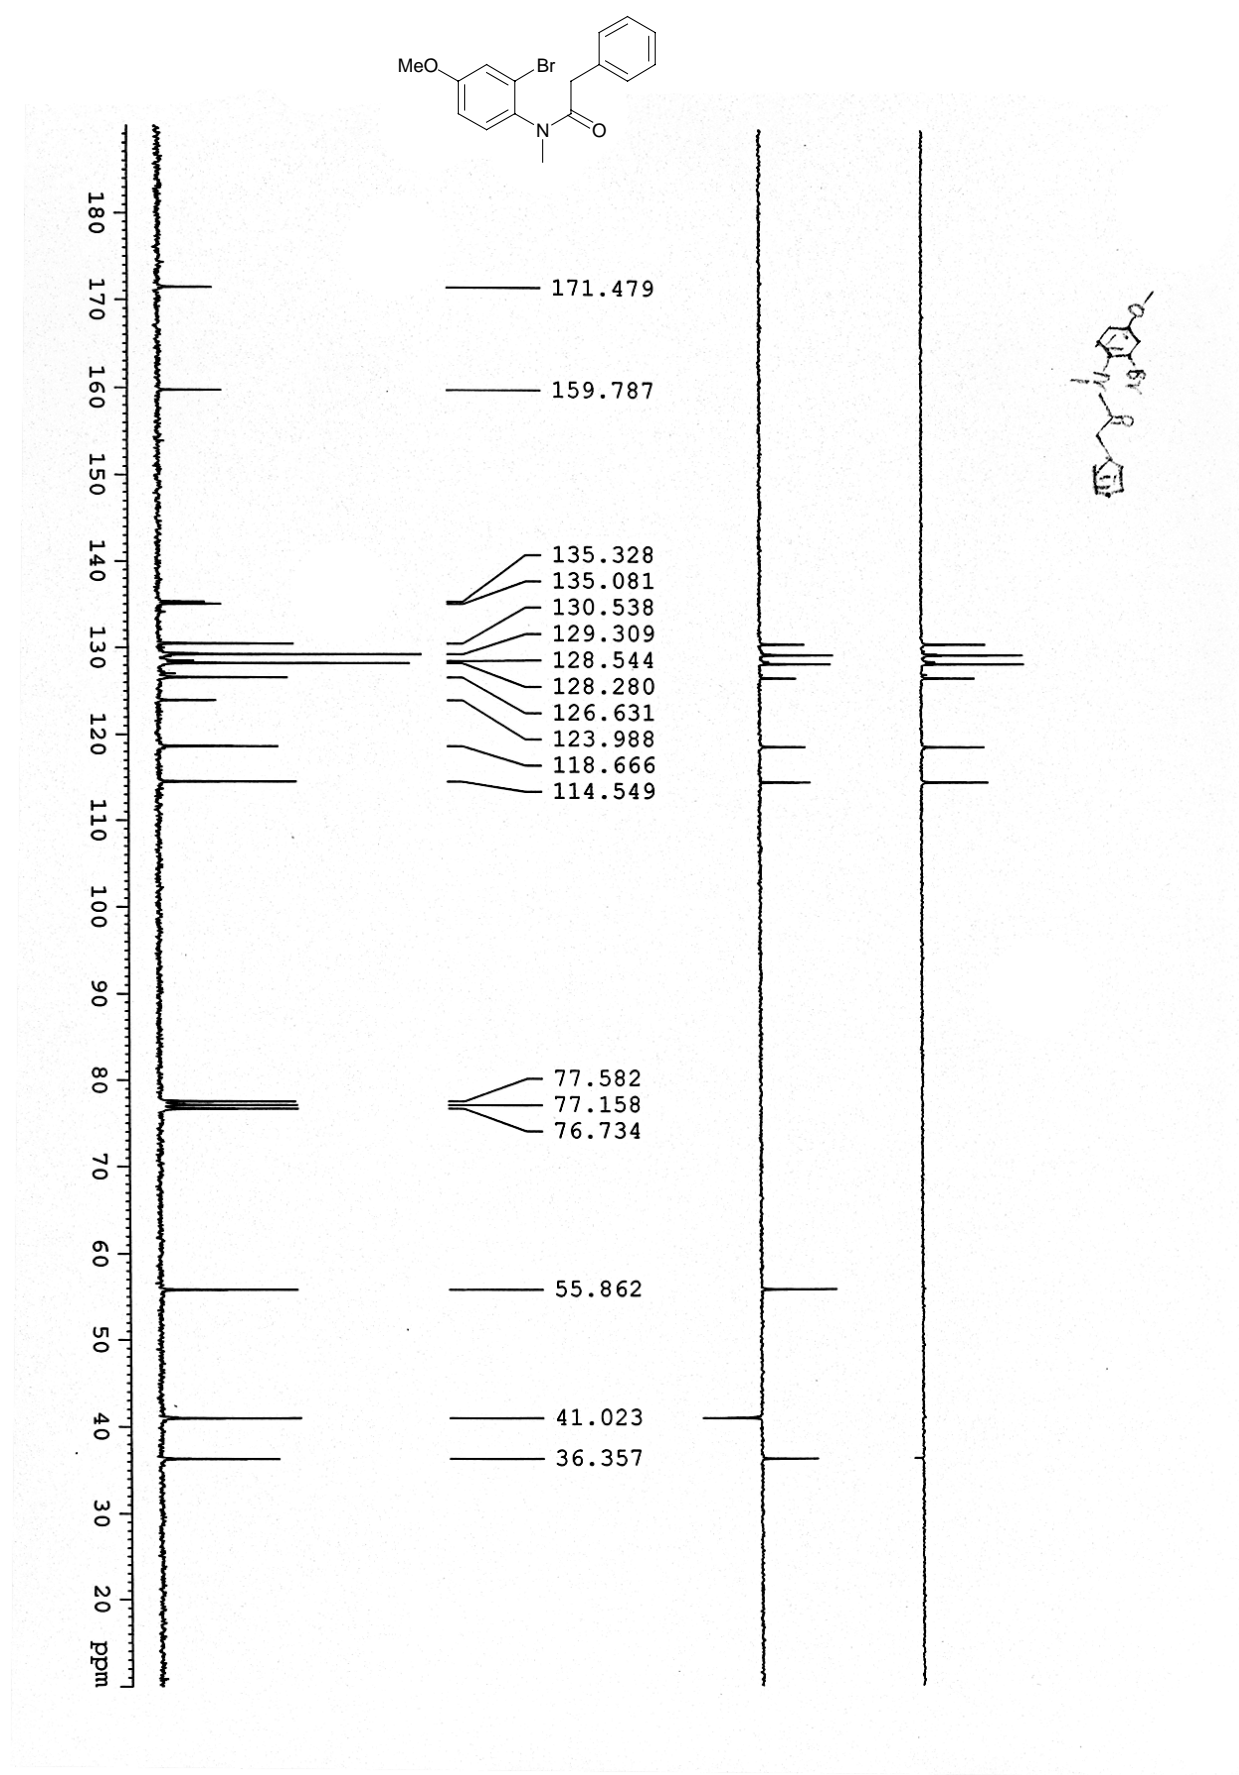

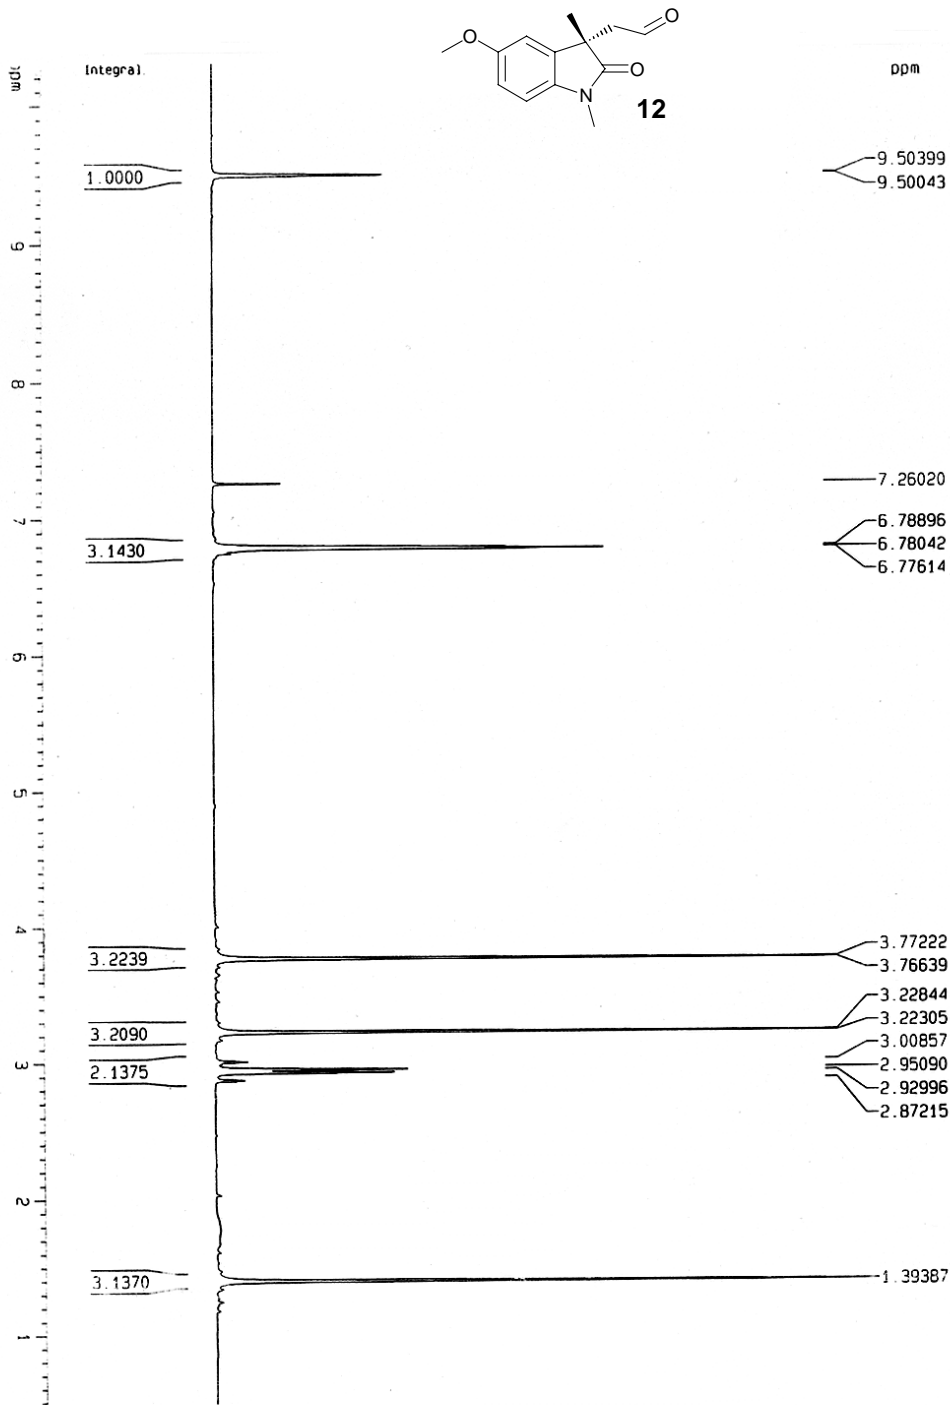

Current Data Parameters

|        |     |
|--------|-----|
| NAME   | 2VY |
| EXPNO  | 222 |
| PROCNO | 1   |

F2 - Acquisition Parameters

|         |                |
|---------|----------------|
| Date_   | 20081121       |
| Time    | 9.25           |
| INSTRUM | av300          |
| PROBHD  | 5 mm QNP 1H/13 |
| PULPROG | zg30           |
| TD      | 65536          |
| SOLVENT | CDCl3          |
| NS      | 16             |
| DS      | 1              |
| SWH     | 4789.272 Hz    |
| FIDRES  | 0.073078 Hz    |
| AQ      | 6.842086 sec   |
| RG      | 228.1          |
| DM      | 104.400 usec   |
| DE      | 6.00 usec      |
| TE      | 295.7 K        |
| D1      | 1.00000000 sec |
| MCREST  | 0.00000000 sec |
| MCPRK   | 0.01500000 sec |

\*\*\*\*\* CHANNEL f1 \*\*\*\*\*

|      |                 |
|------|-----------------|
| NUC1 | 1H              |
| P1   | 8.60 usec       |
| PL1  | -2.00 dB        |
| SFO1 | 300.1321009 MHz |

F2 - Processing parameters

|     |                |
|-----|----------------|
| SI  | 32768          |
| SF  | 300.130121 MHz |
| WDW | EM             |
| SSB | 0              |
| LB  | 0.30 Hz        |
| GB  | 0              |
| PC  | 1.00           |

1D NMR Plot Parameters

|       |                 |
|-------|-----------------|
| CX    | 23.00 cm        |
| CY    | 12.50 cm        |
| F1P   | 10.331 ppm      |
| F1    | 3100.75 Hz      |
| F2P   | 0.490 ppm       |
| F2    | 147.17 Hz       |
| PPMCH | 0.42767 ppm/cm  |
| HZCH  | 128.41655 Hz/cm |



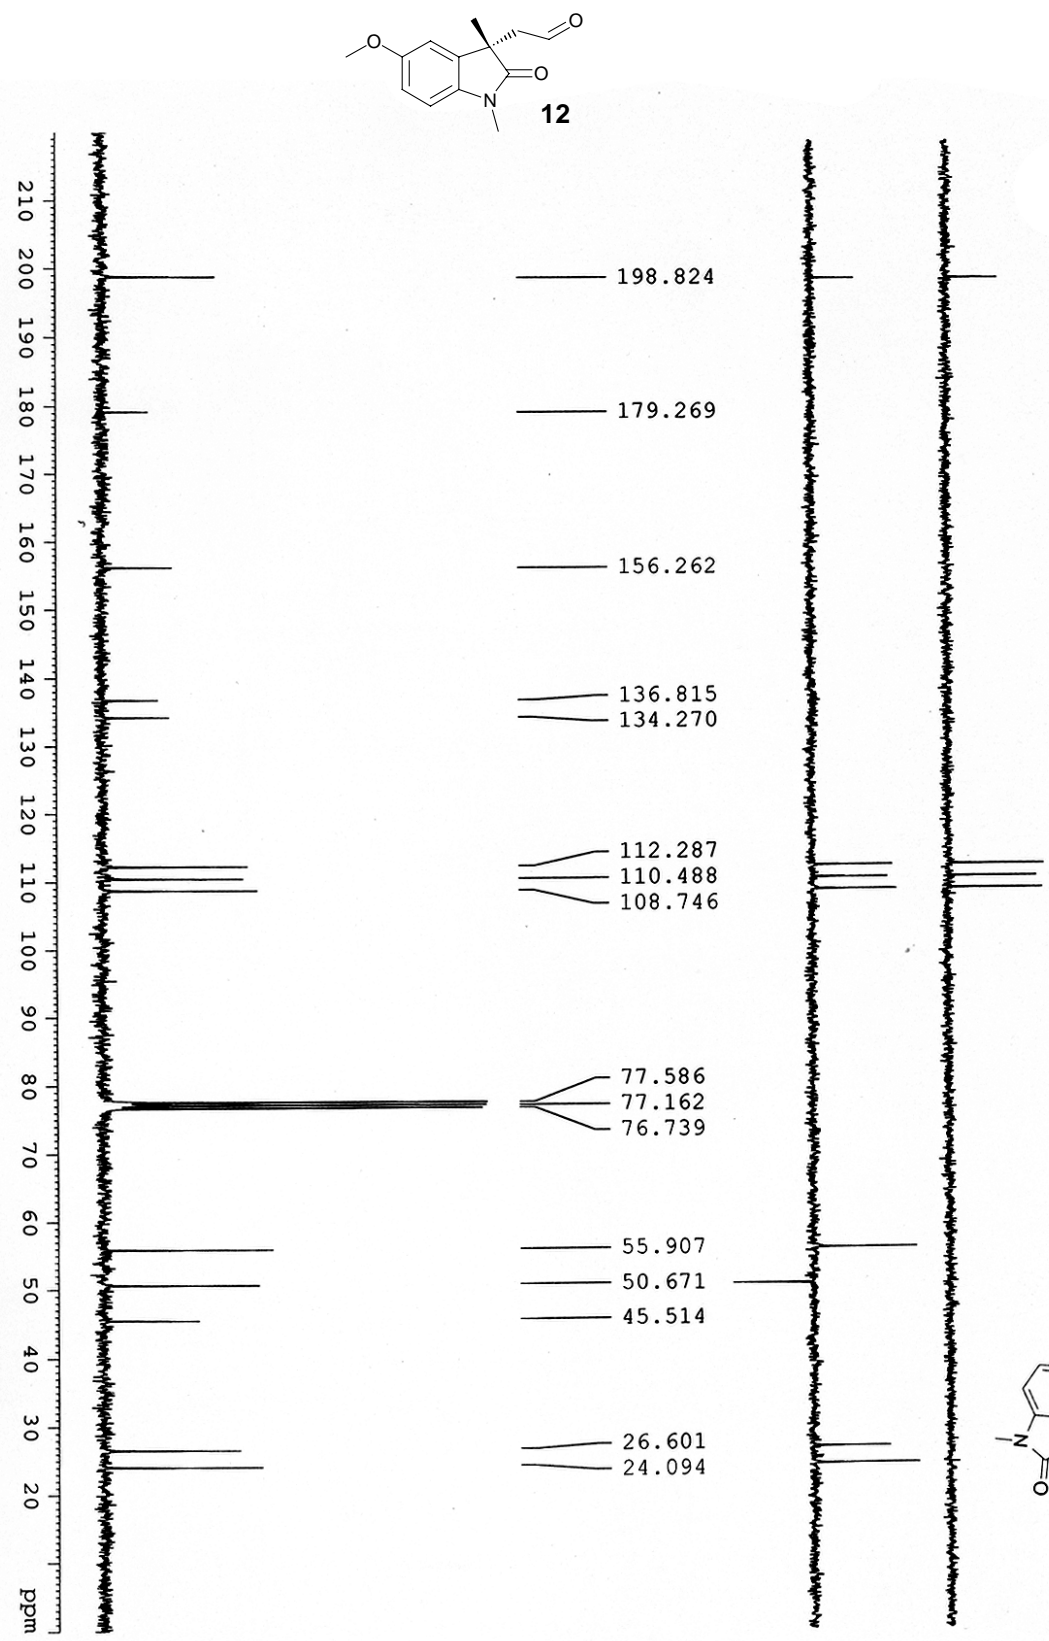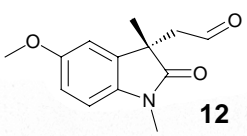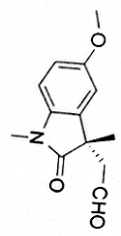

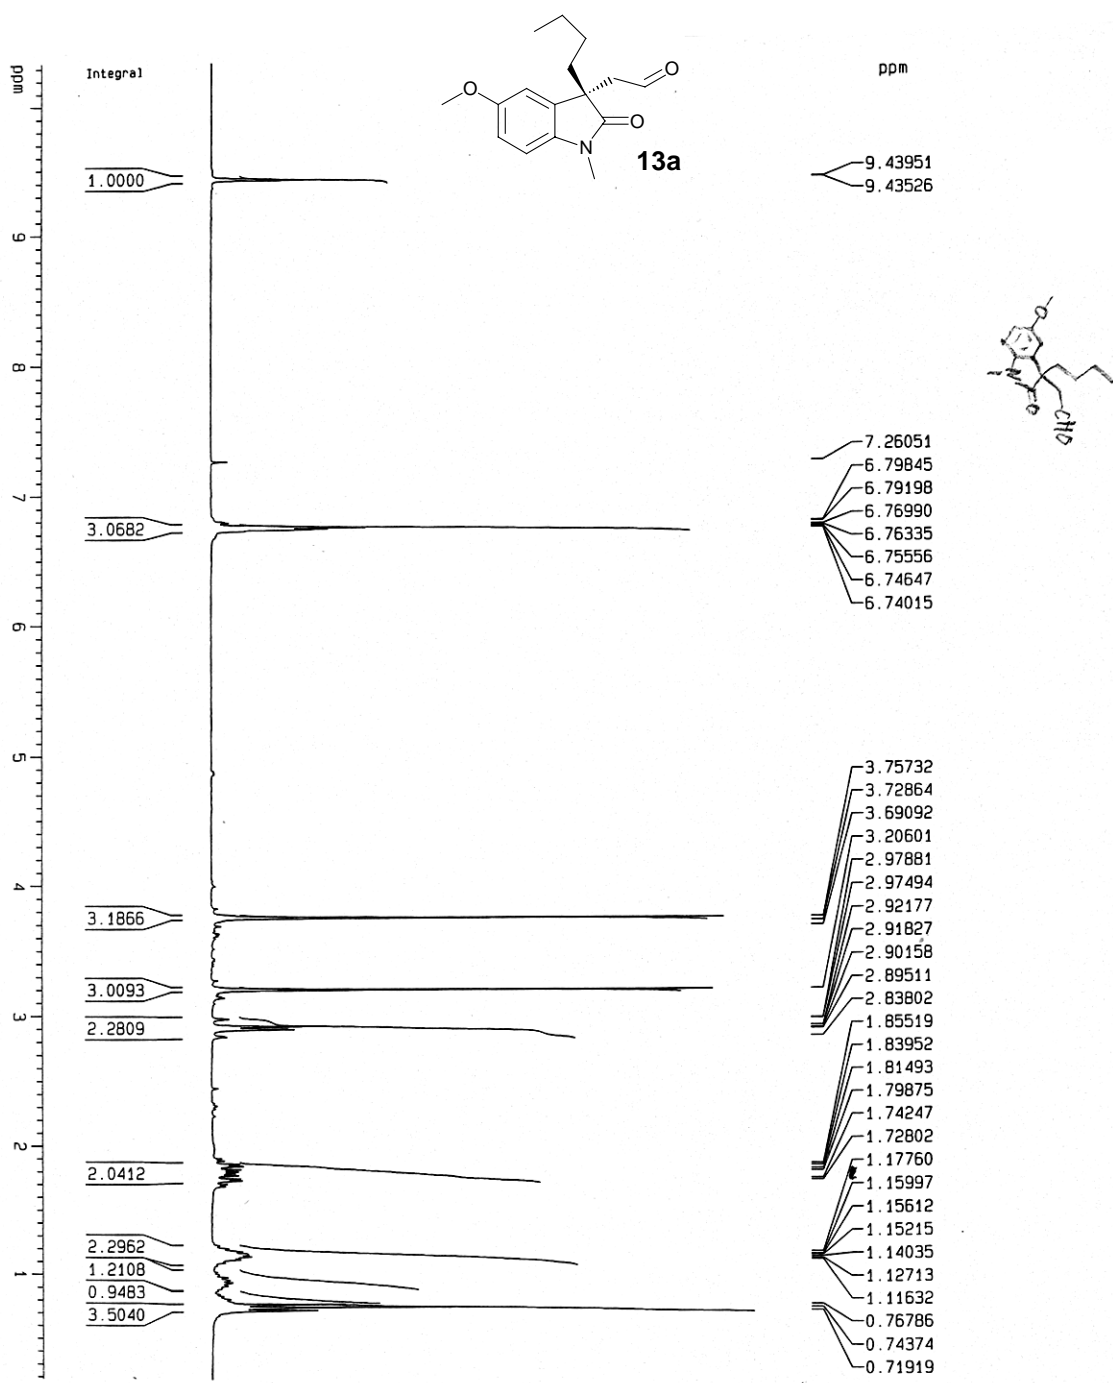

Current Data Parameters

|        |     |
|--------|-----|
| NAME   | zyy |
| EXPNO  | 407 |
| PROCNO | 1   |

F2 - Acquisition Parameters

|         |                |
|---------|----------------|
| Date_   | 20100104       |
| Time    | 11.35          |
| INSTRUM | av300          |
| PROBHD  | 5 mm QNP 1H/13 |
| PULPROG | zg30           |
| TD      | 65536          |
| SOLVENT | CDCl3          |
| NS      | 11             |
| DS      | 1              |
| SWH     | 4789.272 Hz    |
| FIDRES  | 0.073078 Hz    |
| AQ      | 6.842086 sec   |
| RG      | 90.5           |
| DM      | 104.400 usec   |
| DE      | 6.00 usec      |
| TE      | 295.4 K        |
| D1      | 1.00000000 sec |
| MCREST  | 0.00000000 sec |
| MCNMR   | 0.01500000 sec |

===== CHANNEL f1 =====

|      |                 |
|------|-----------------|
| NUC1 | 1H              |
| P1   | 8.60 usec       |
| PL1  | -2.00 dB        |
| SFO1 | 300.1321009 MHz |

F2 - Processing parameters

|     |                 |
|-----|-----------------|
| SI  | 32768           |
| SF  | 300.1300057 MHz |
| WDW | EM              |
| SSB | 0               |
| LB  | 0.30 Hz         |
| GB  | 0               |
| PC  | 1.00            |

1D NMR plot parameters

|       |                 |
|-------|-----------------|
| CX    | 23.00 cm        |
| CY    | 9.00 cm         |
| F1P   | 10.344 ppm      |
| F1    | 3104.59 Hz      |
| F2P   | 0.183 ppm       |
| F2    | 54.92 Hz        |
| PPMCH | 0.44179 ppm/cm  |
| HZCH  | 132.59439 Hz/cm |

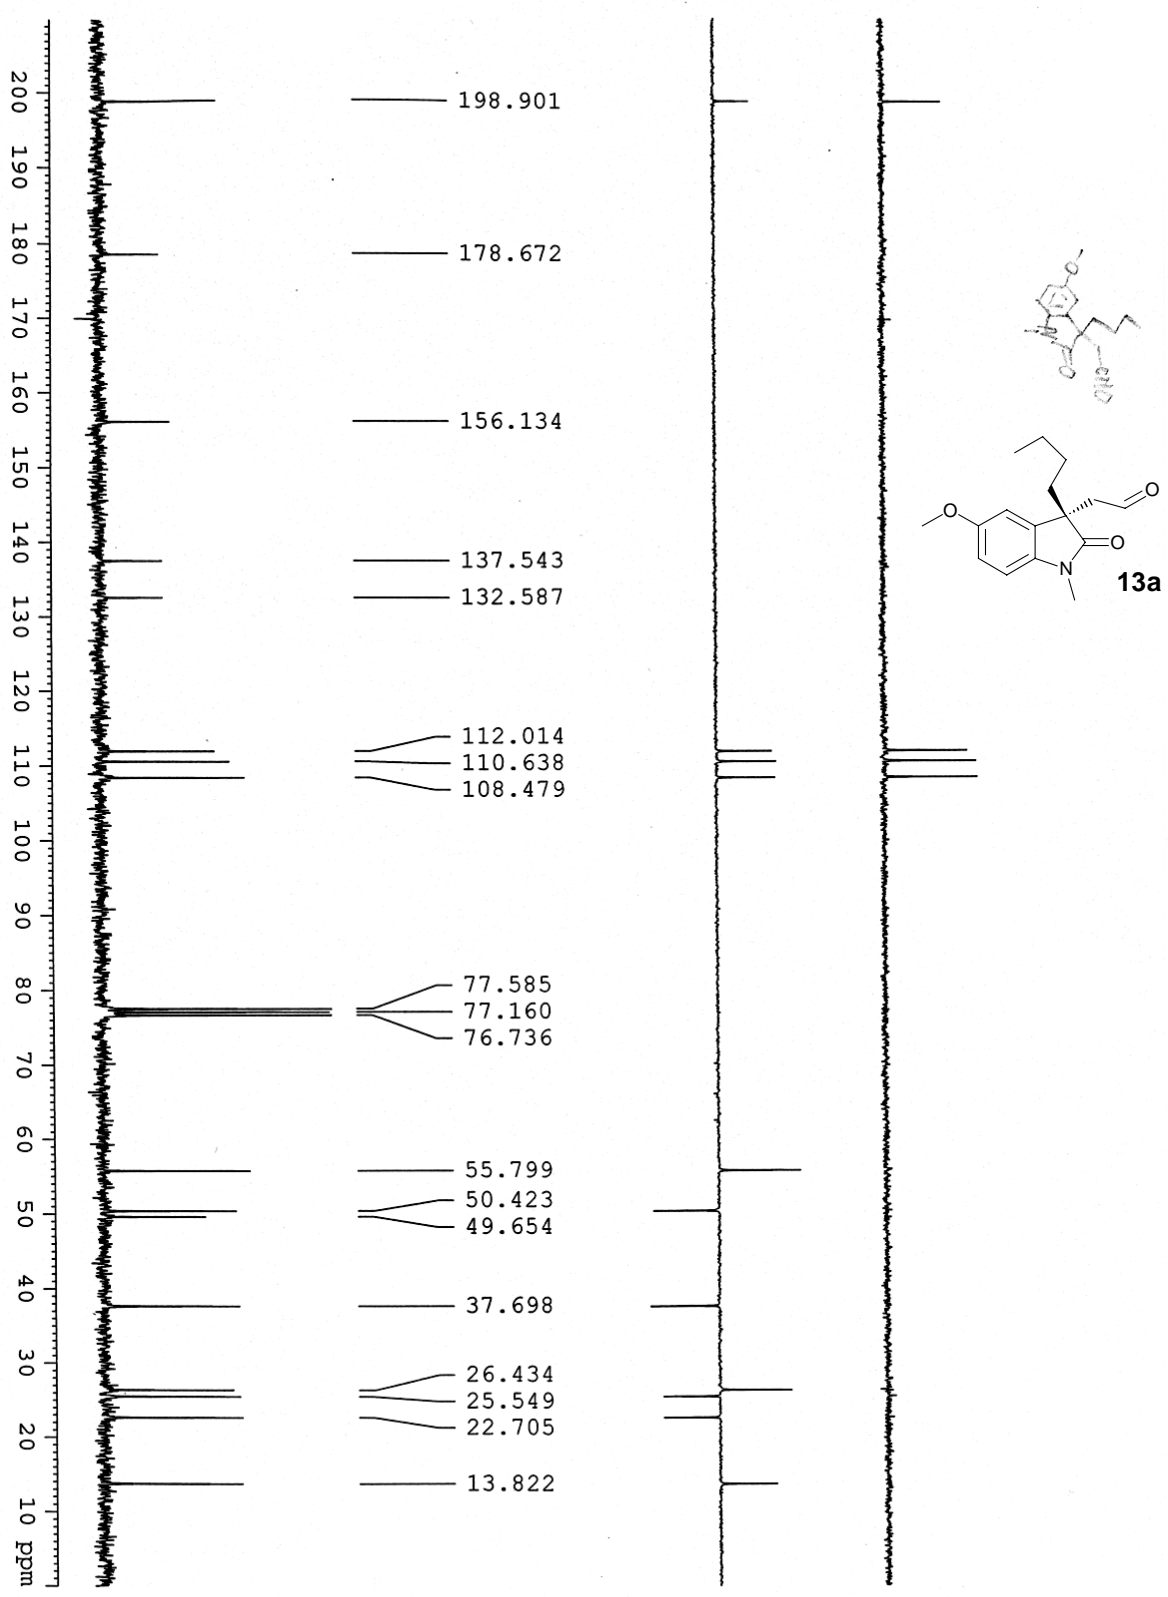



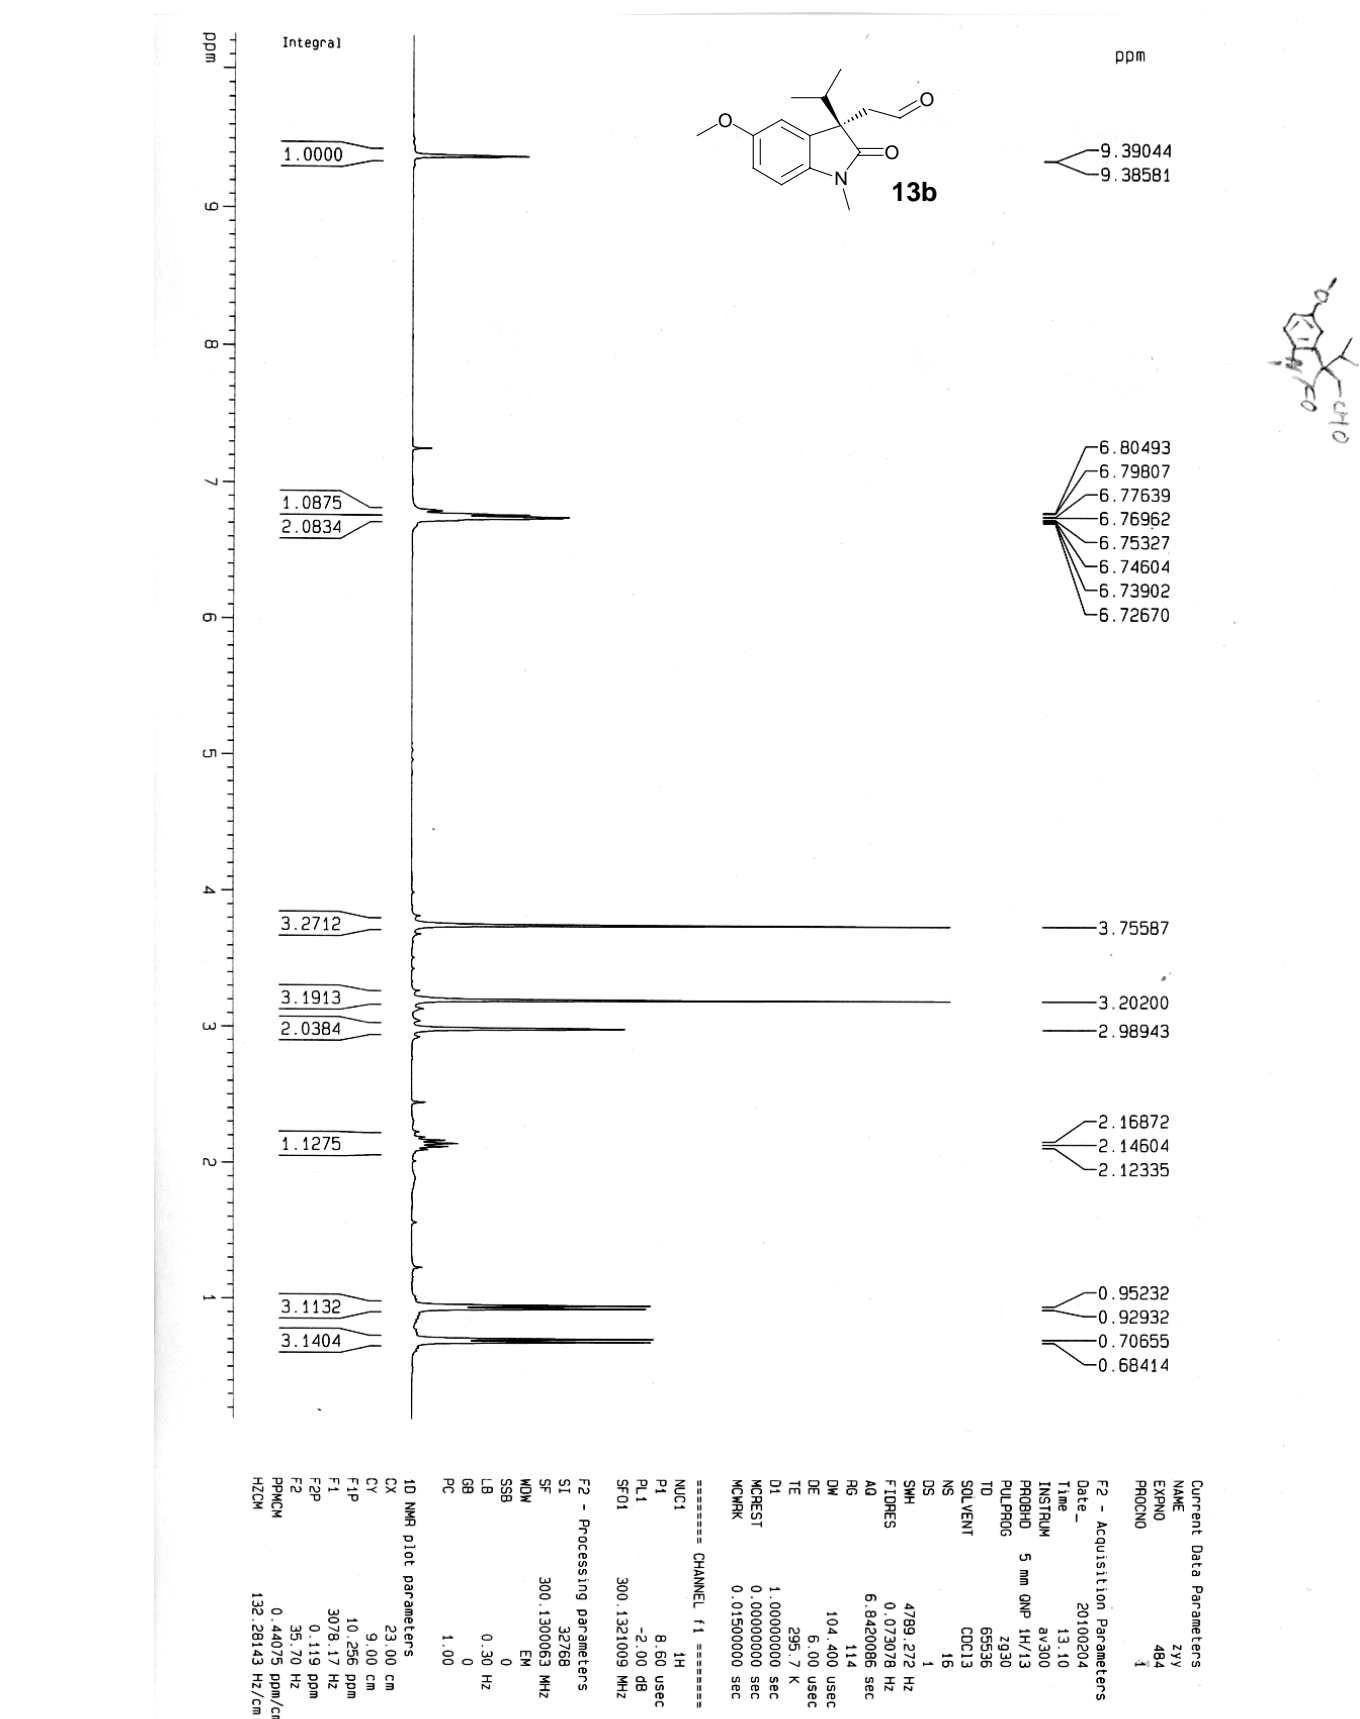

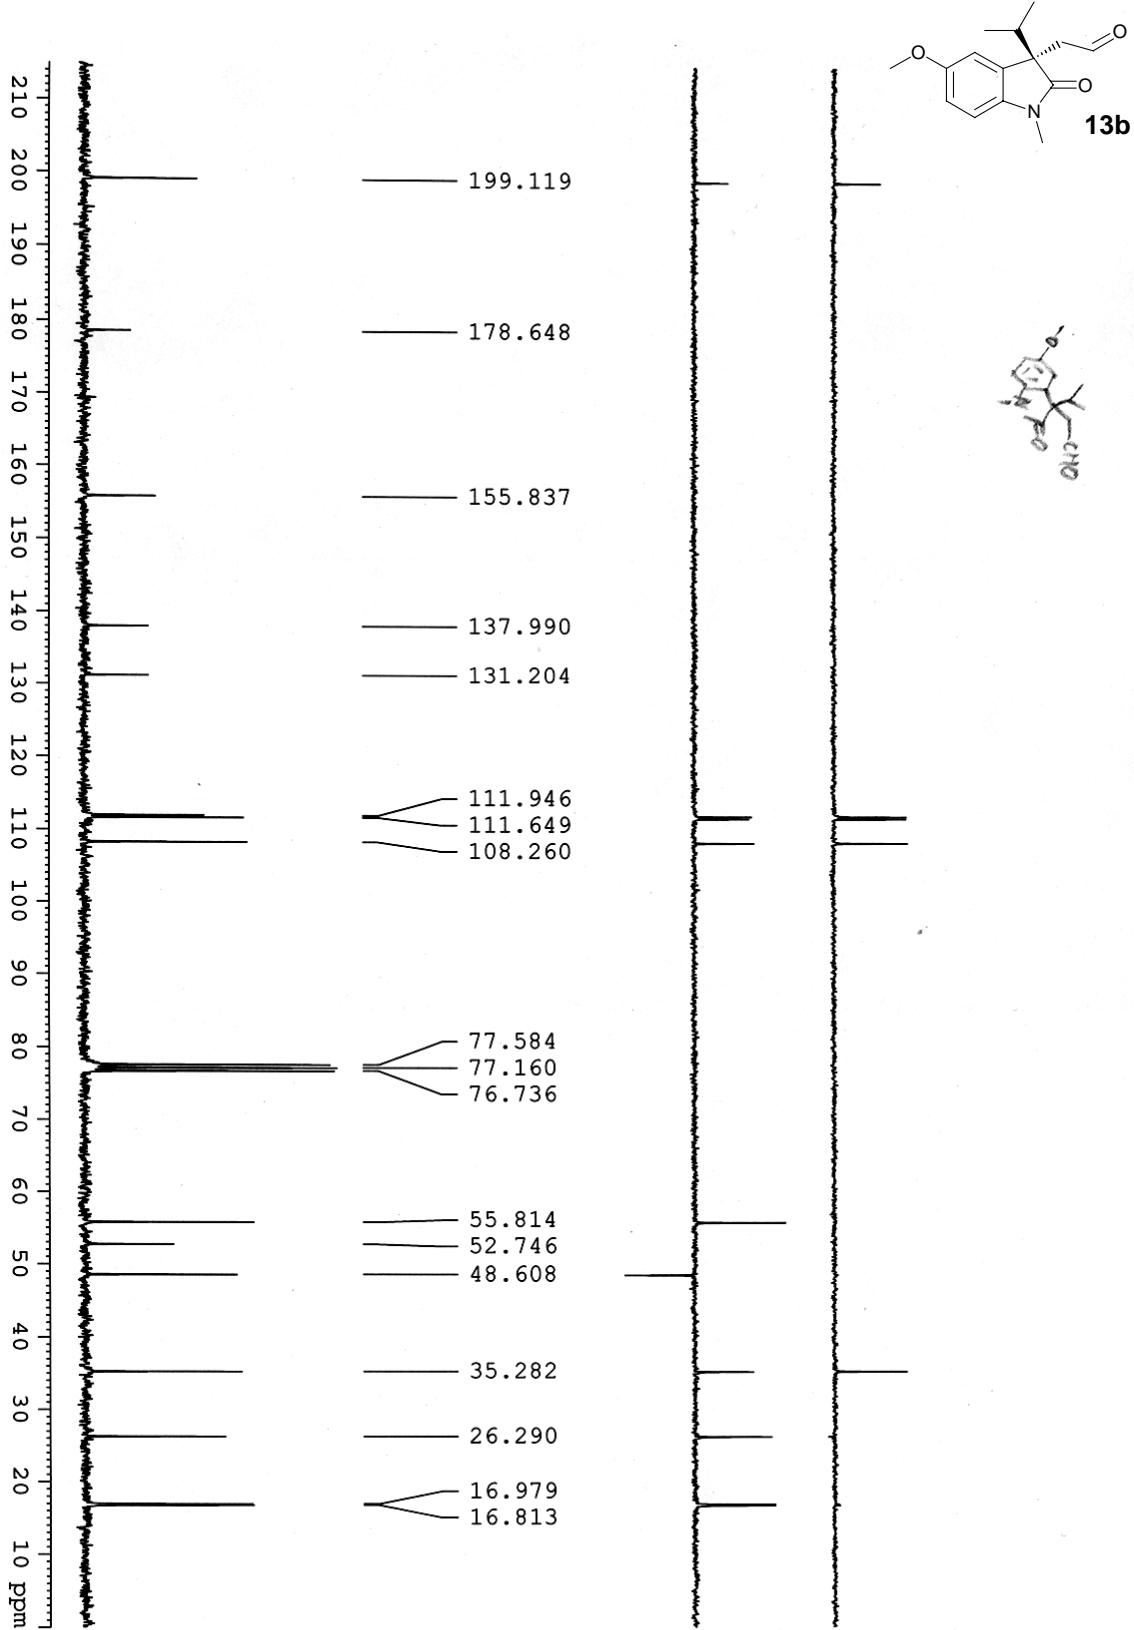

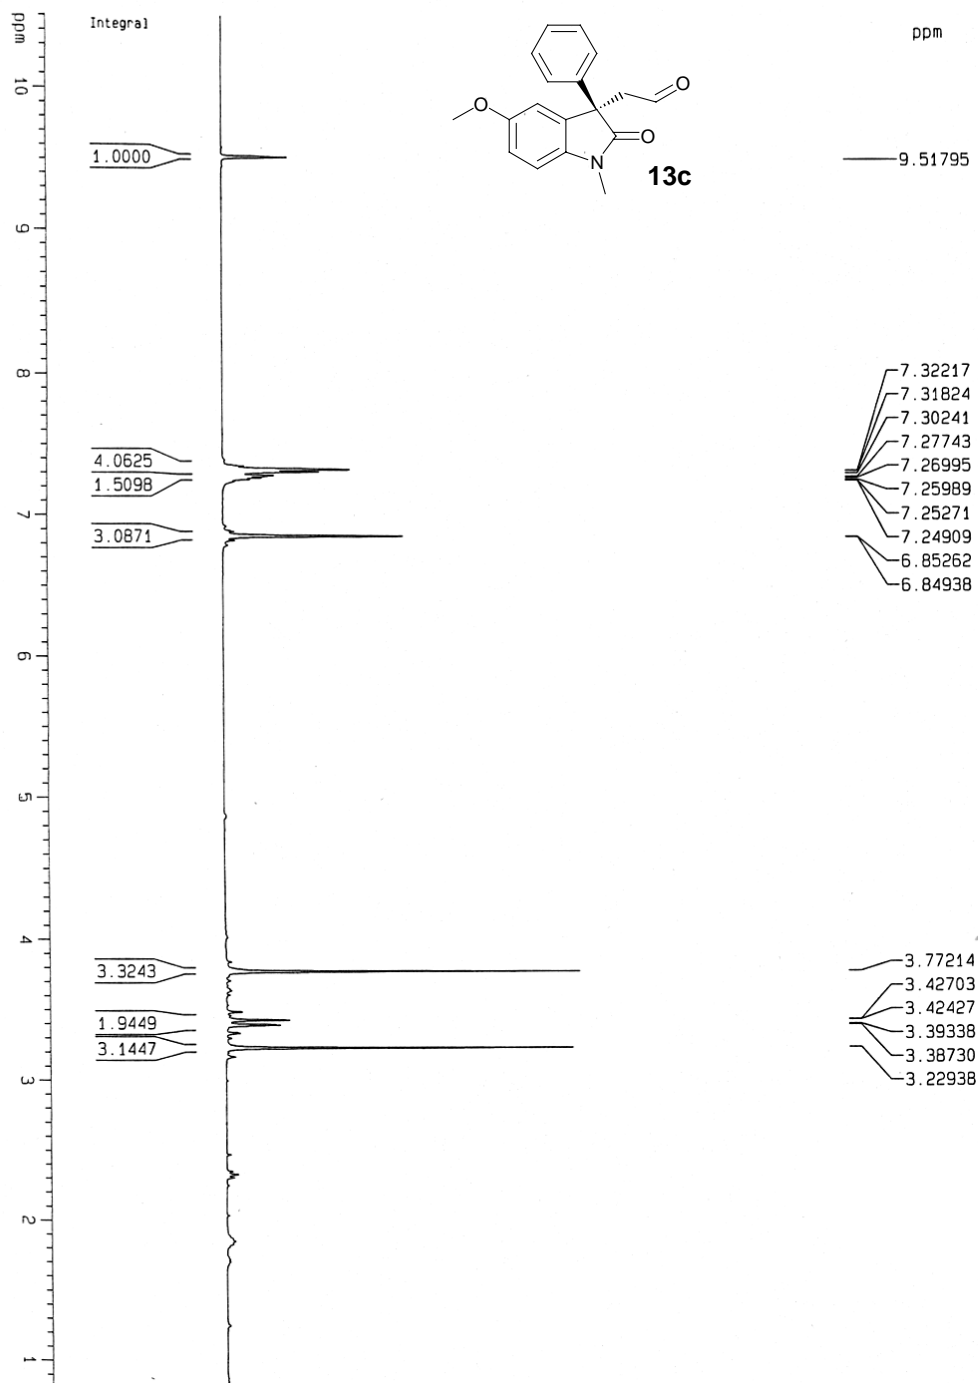

Current Data Parameters

|        |     |
|--------|-----|
| NAME   | z1y |
| EXPNO  | 388 |
| PROCNO | 1   |

F2 - Acquisition Parameters

|         |                |
|---------|----------------|
| Date_   | 20091228       |
| Time    | 10.35          |
| INSTRUM | av300          |
| PROBHD  | 5 mm QNP 1H/13 |
| PULPROG | zg30           |
| TD      | 65536          |
| SOLVENT | CDCl3          |
| NS      | 9              |
| DS      | 1              |
| SWH     | 4789.272 Hz    |
| FIDRES  | 0.073078 Hz    |
| AQ      | 6.842086 sec   |
| RG      | 114            |
| DM      | 104.400 usec   |
| DE      | 6.00 usec      |
| TE      | 294.4 K        |
| D1      | 1.00000000 sec |
| MCREST  | 0.00000000 sec |
| MCNMR   | 0.01500000 sec |

\*\*\*\*\* CHANNEL f1 \*\*\*\*\*

|      |                |
|------|----------------|
| NUC1 | 1H             |
| P1   | 8.60 usec      |
| PL1  | -2.00 dB       |
| SFO1 | 300.132109 MHz |

F2 - Processing parameters

|     |                |
|-----|----------------|
| SI  | 32768          |
| SF  | 300.130061 MHz |
| WDW | EM             |
| SSB | 0              |
| LB  | 0.30 Hz        |
| GB  | 0              |
| PC  | 1.00           |

1D NMR plot parameters

|       |                 |
|-------|-----------------|
| CK    | 23.00 cm        |
| CV    | 6.00 cm         |
| F1P   | 10.506 ppm      |
| F1    | 3153.25 Hz      |
| F2P   | 0.833 ppm       |
| F2    | 250.00 Hz       |
| PPMCM | 0.42058 ppm/cm  |
| HZCM  | 126.22852 Hz/cm |



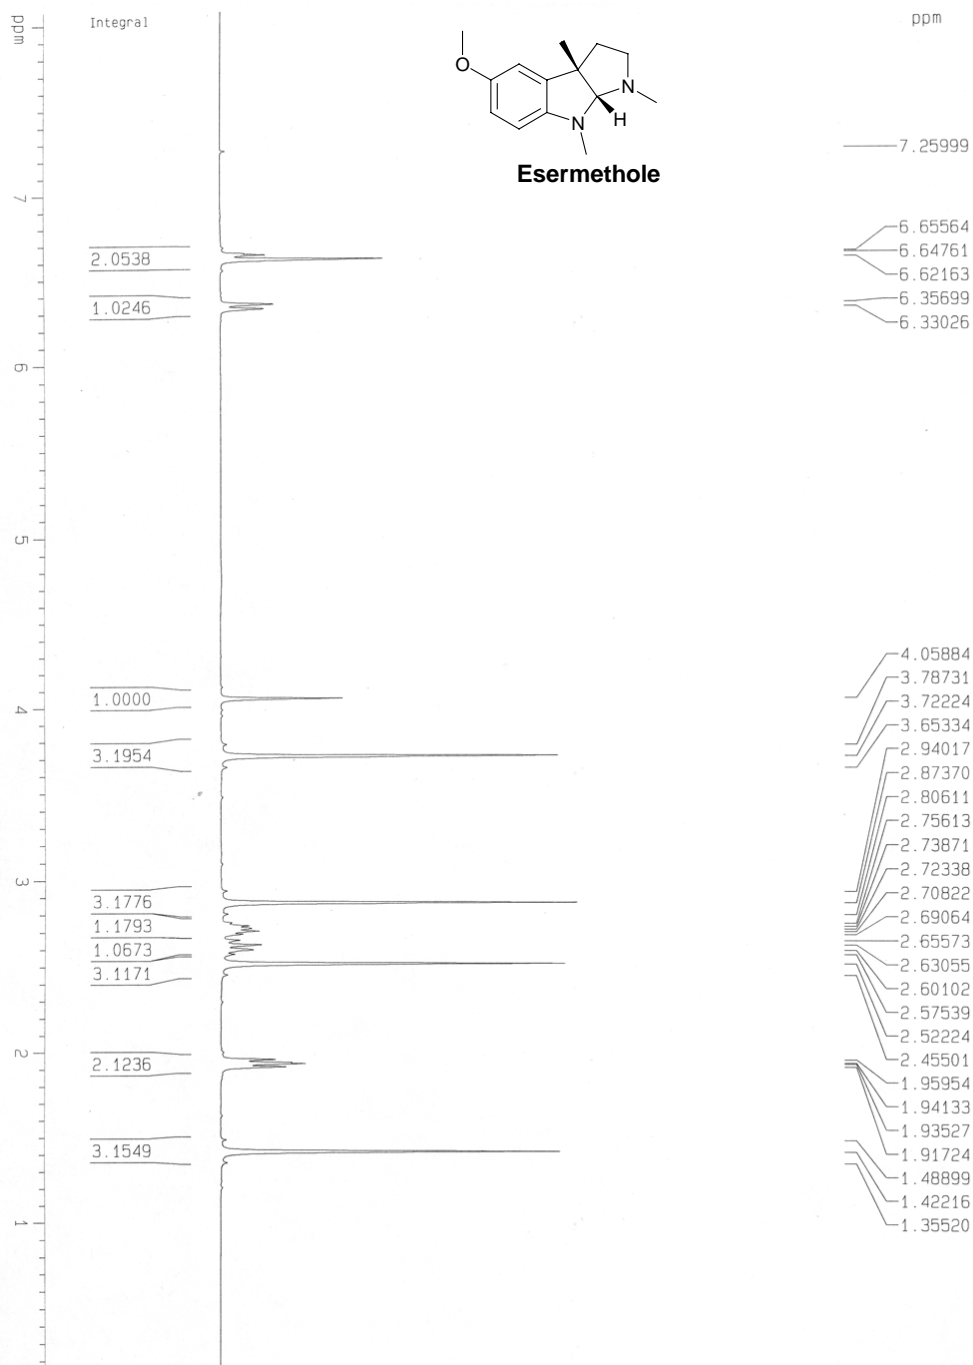

Current Data Parameters

|        |     |
|--------|-----|
| NAME   | zyy |
| EXPNO  | 635 |
| PROCNO | 1   |

F2 - Acquisition Parameters

|         |                |
|---------|----------------|
| Date_   | 20100425       |
| Time    | 12.03          |
| INSTRUM | av300          |
| PROBHD  | 5 mm QNP 1H/13 |
| PULPROG | zg30           |
| TD      | 65536          |
| SOLVENT | CDCl3          |
| NS      | 7              |
| DS      | 2              |
| SWH     | 4789.272 Hz    |
| FIDRES  | 0.073078 Hz    |
| AQ      | 6.842086 sec   |
| RG      | 35.9           |
| DW      | 104.400 usec   |
| DE      | 6.00 usec      |
| TE      | 294.5 K        |
| D1      | 1.00000000 sec |
| MCREST  | 0.00000000 sec |
| MCNMR   | 0.01500000 sec |

===== CHANNEL f1 =====

|      |                |
|------|----------------|
| NUC1 | <sup>1</sup> H |
| P1   | 8.60 usec      |
| PL1  | -2.00 dB       |
| SFO1 | 300.132109 MHz |

F2 - Processing parameters

|     |                |
|-----|----------------|
| SI  | 32768          |
| SF  | 300.130063 MHz |
| WDW | EM             |
| SSB | 0              |
| LB  | 0.30 Hz        |
| GB  | 0              |
| PC  | 1.00           |

1D NMR plot parameters

|       |                 |
|-------|-----------------|
| CX    | 23.00 cm        |
| CY    | 6.00 cm         |
| F1P   | 8.077 ppm       |
| F1    | 2424.20 Hz      |
| F2P   | 0.167 ppm       |
| F2    | 49.98 Hz        |
| PPMCH | 0.34394 ppm/cm  |
| HZCM  | 103.22691 Hz/cm |

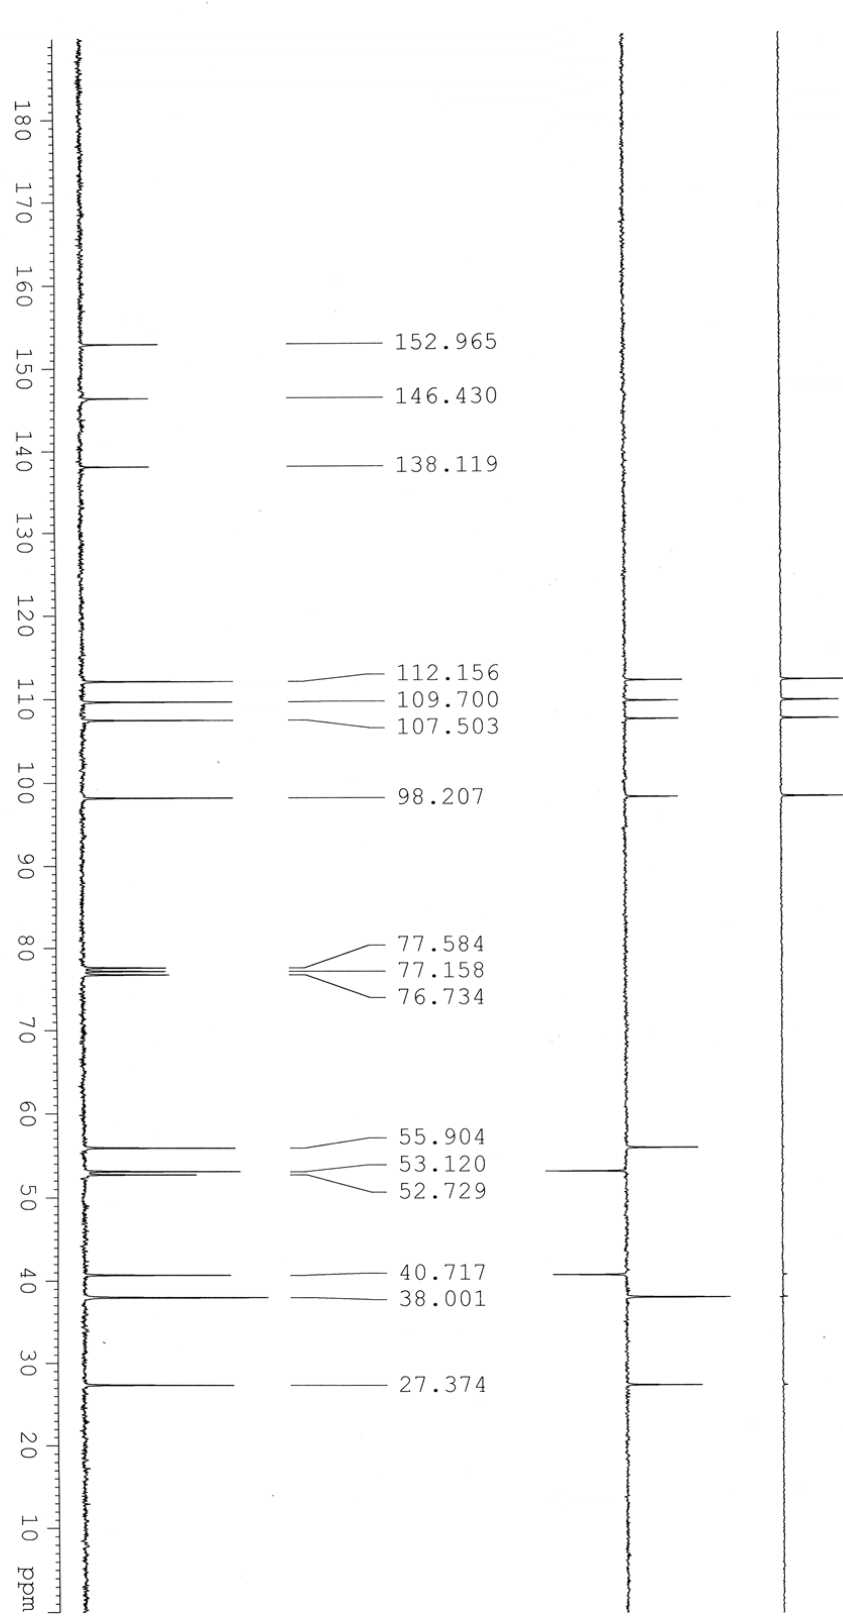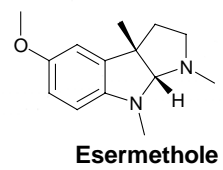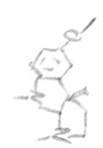

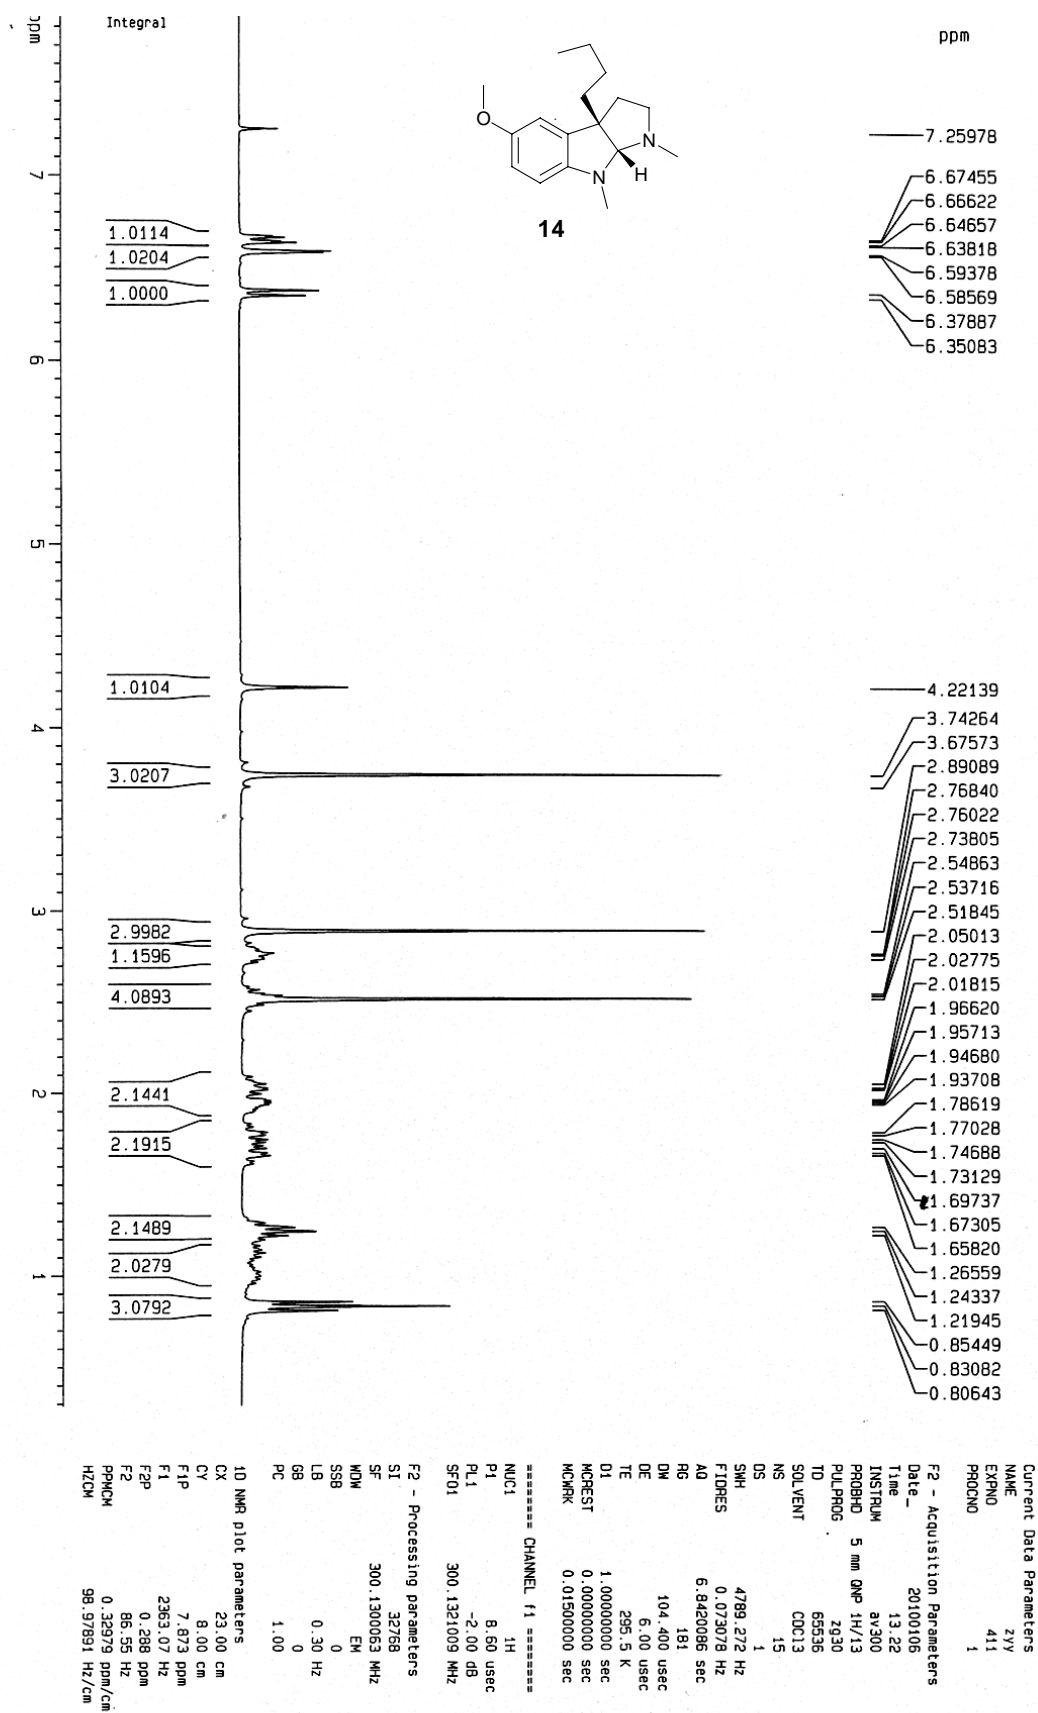



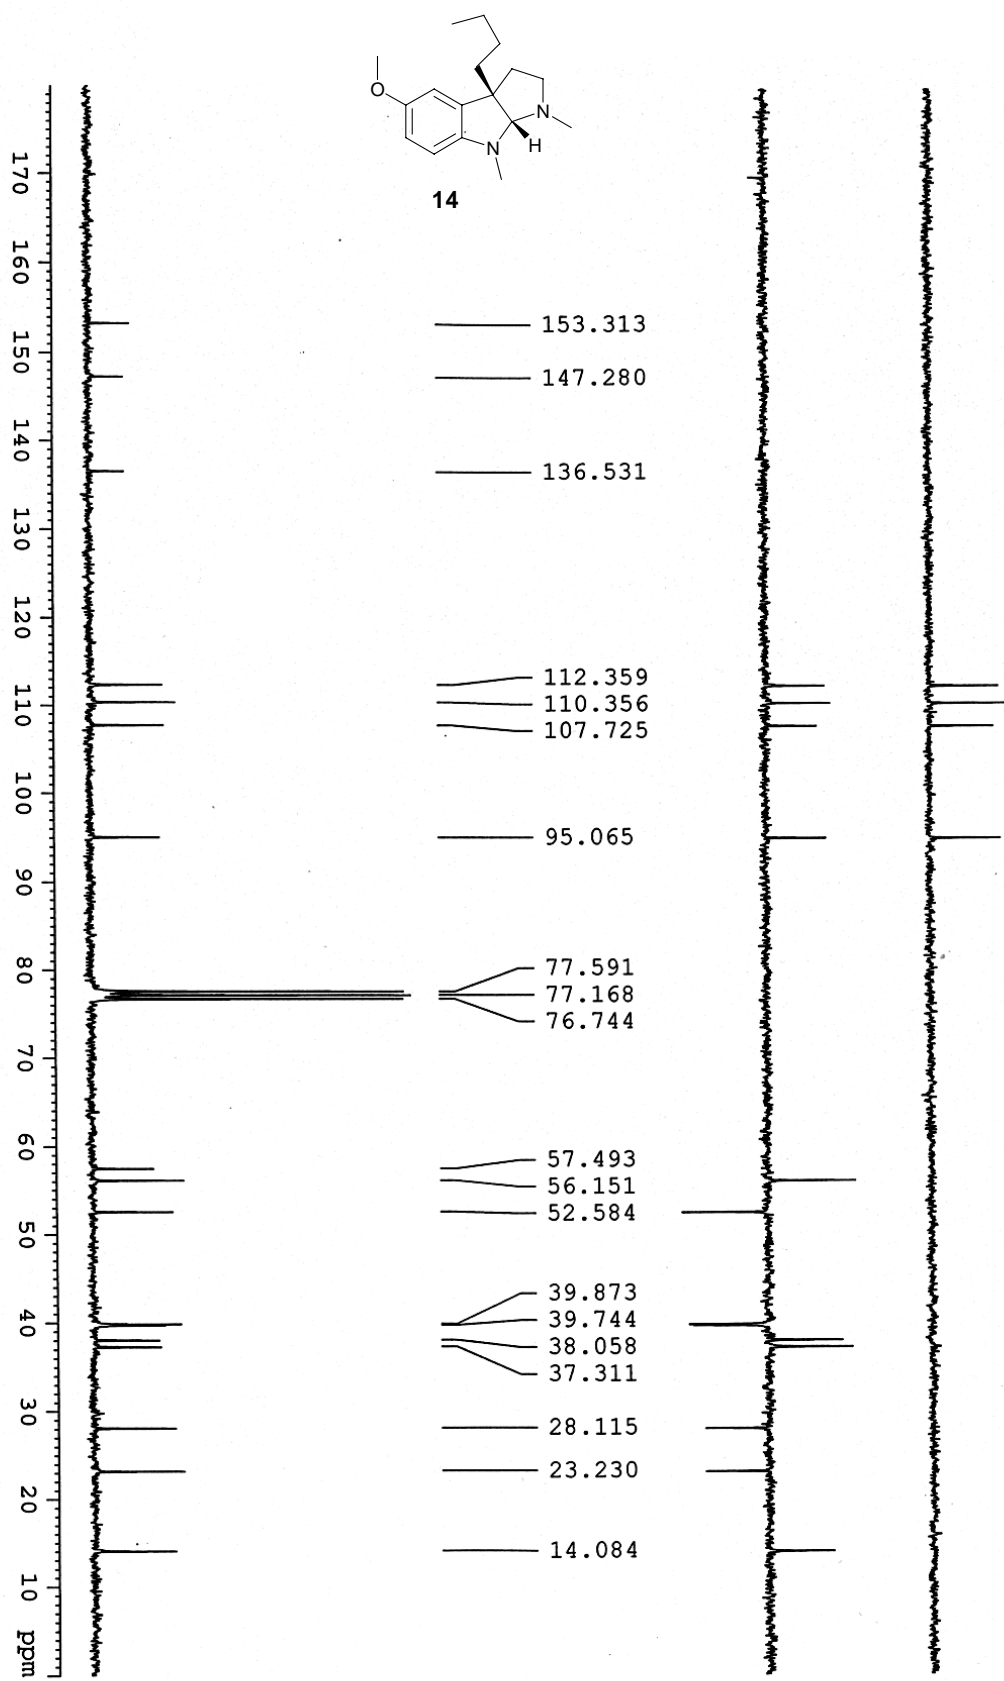

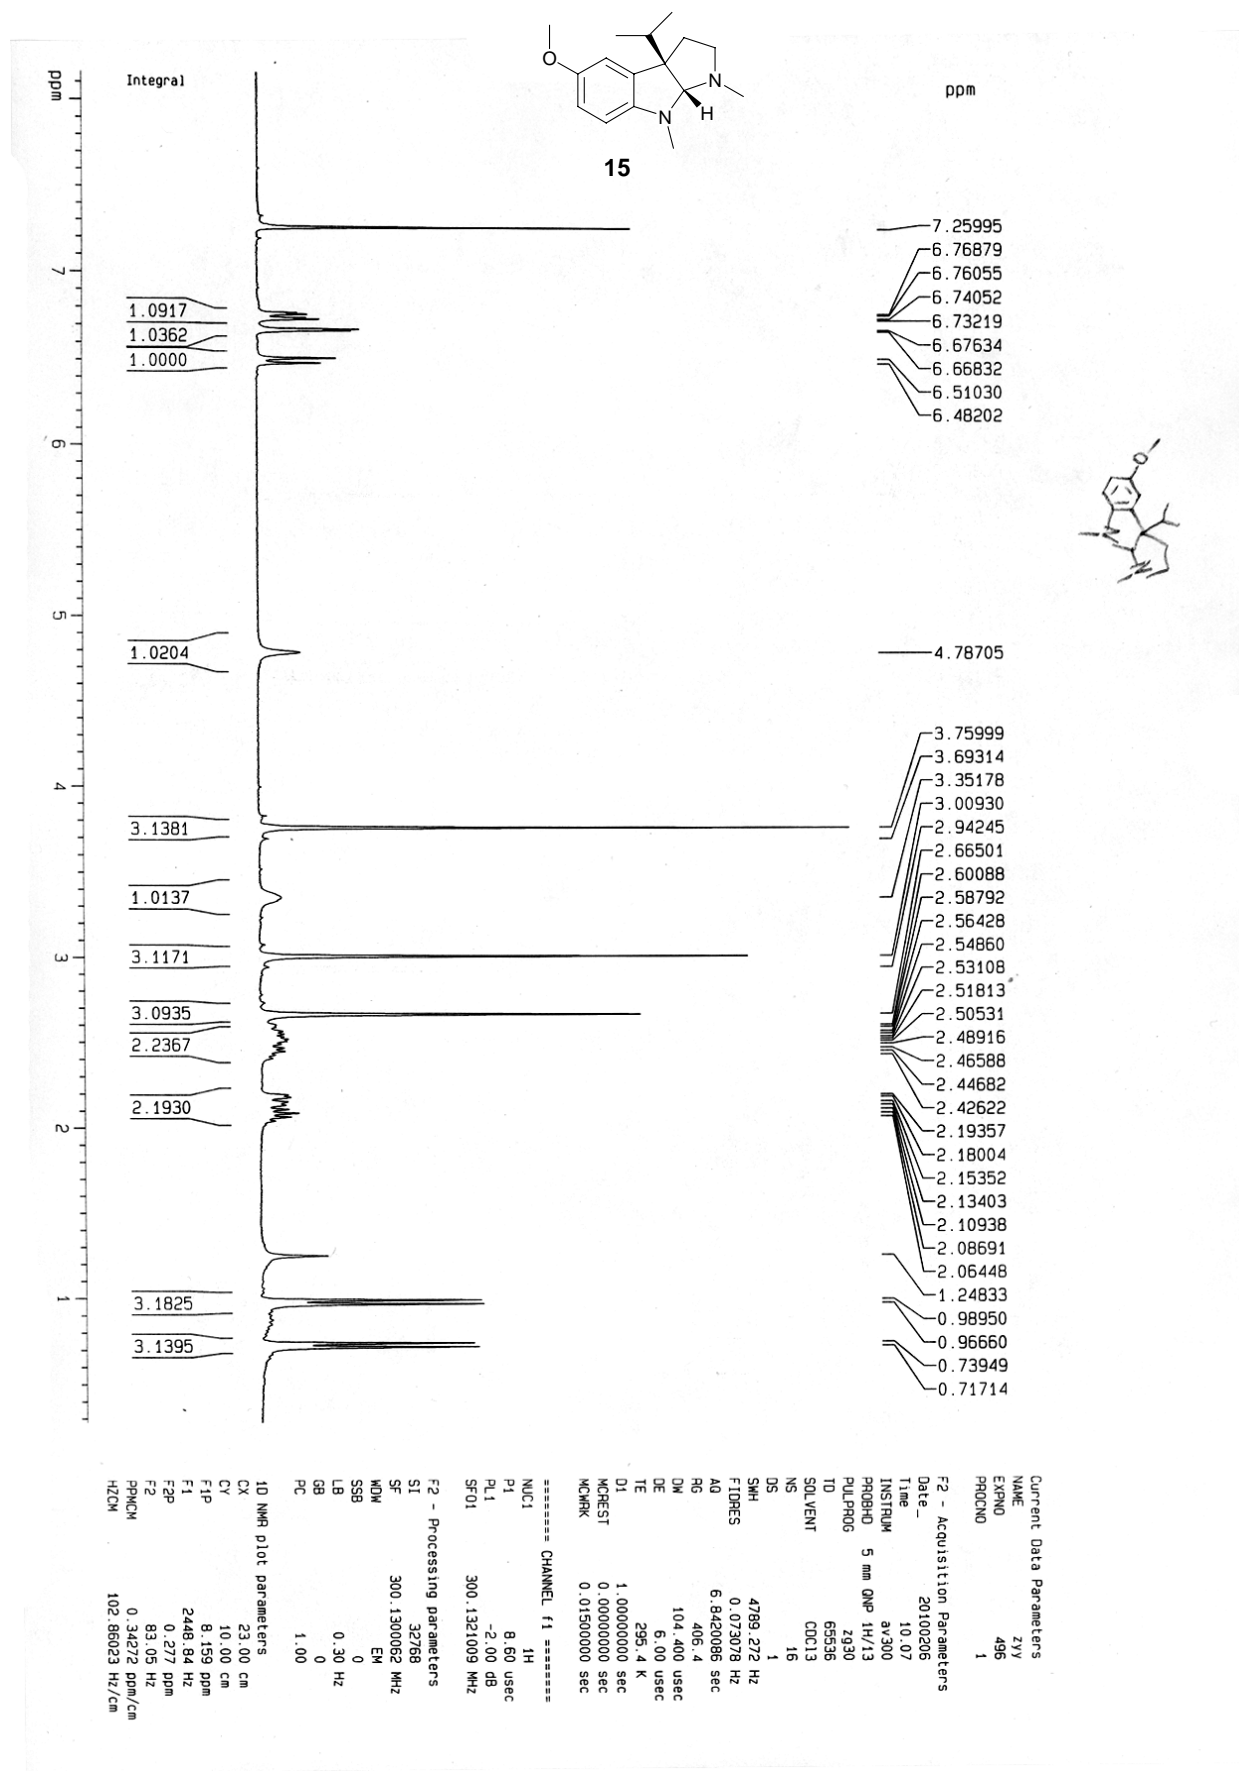

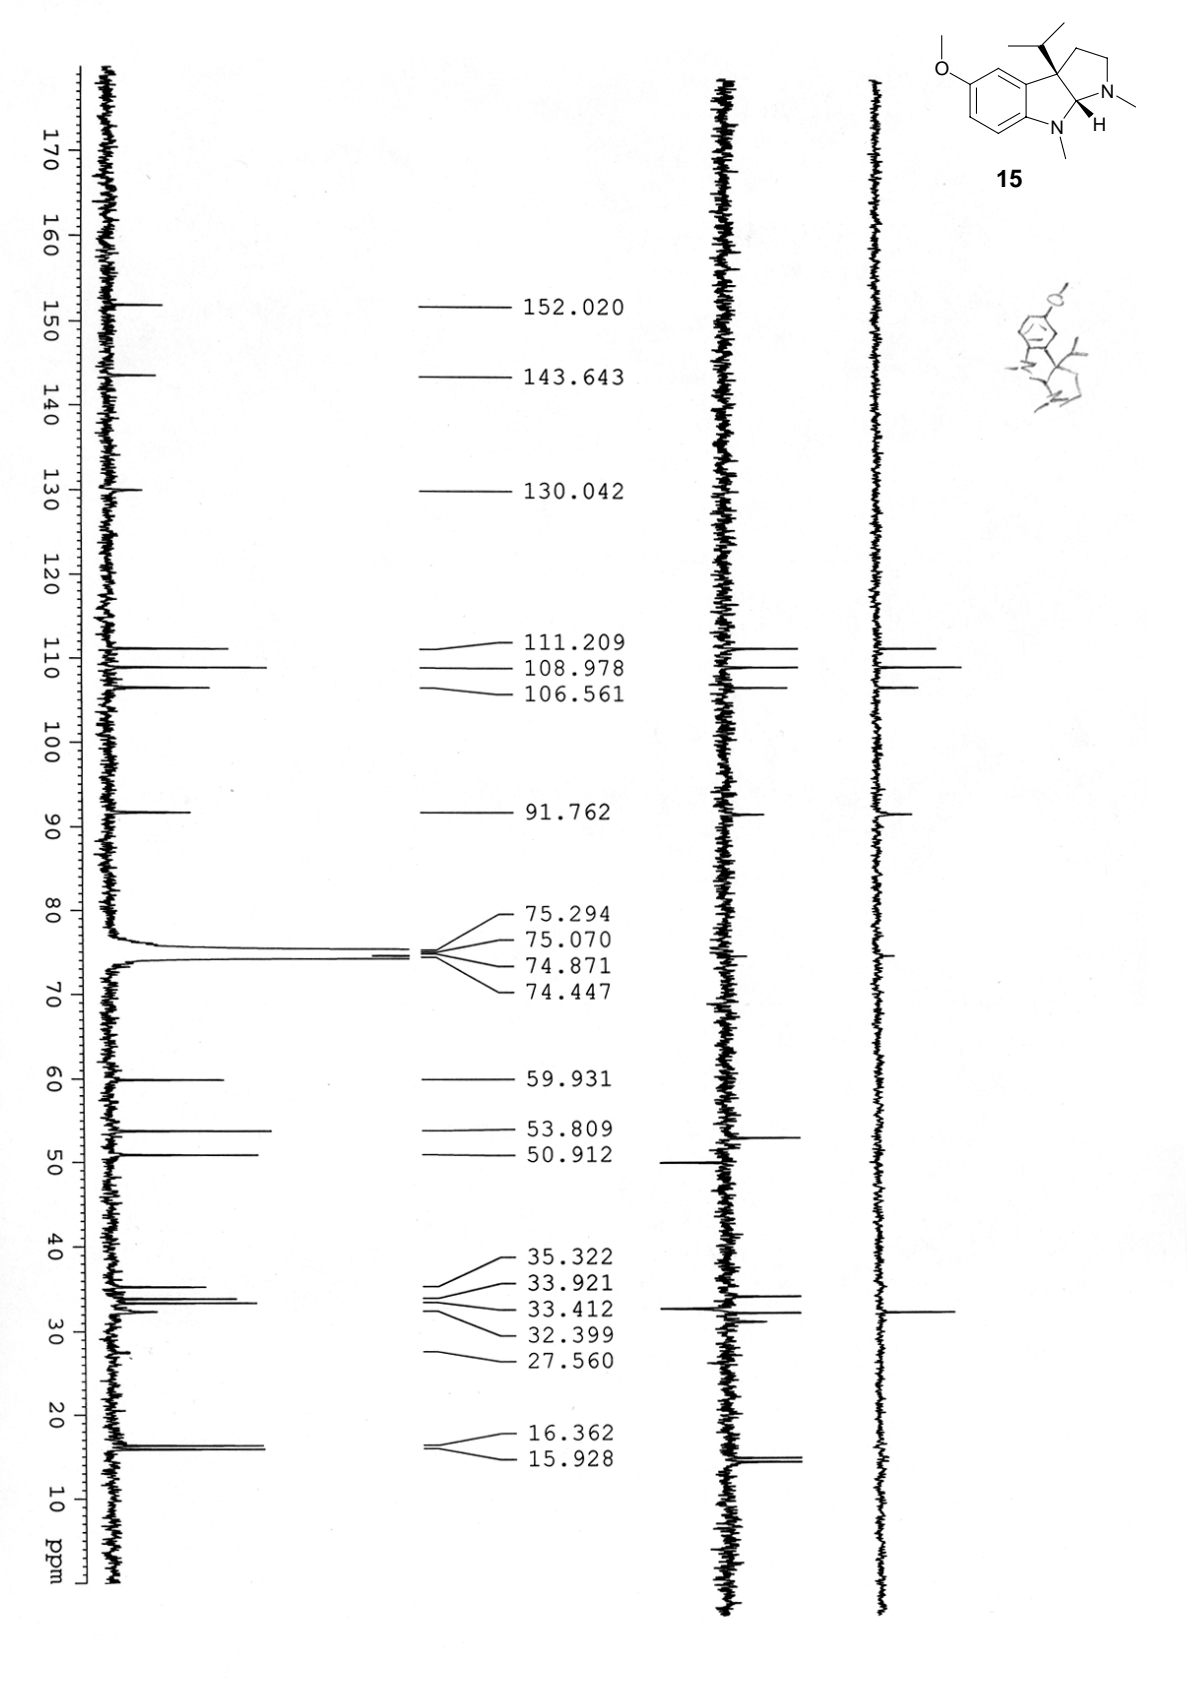

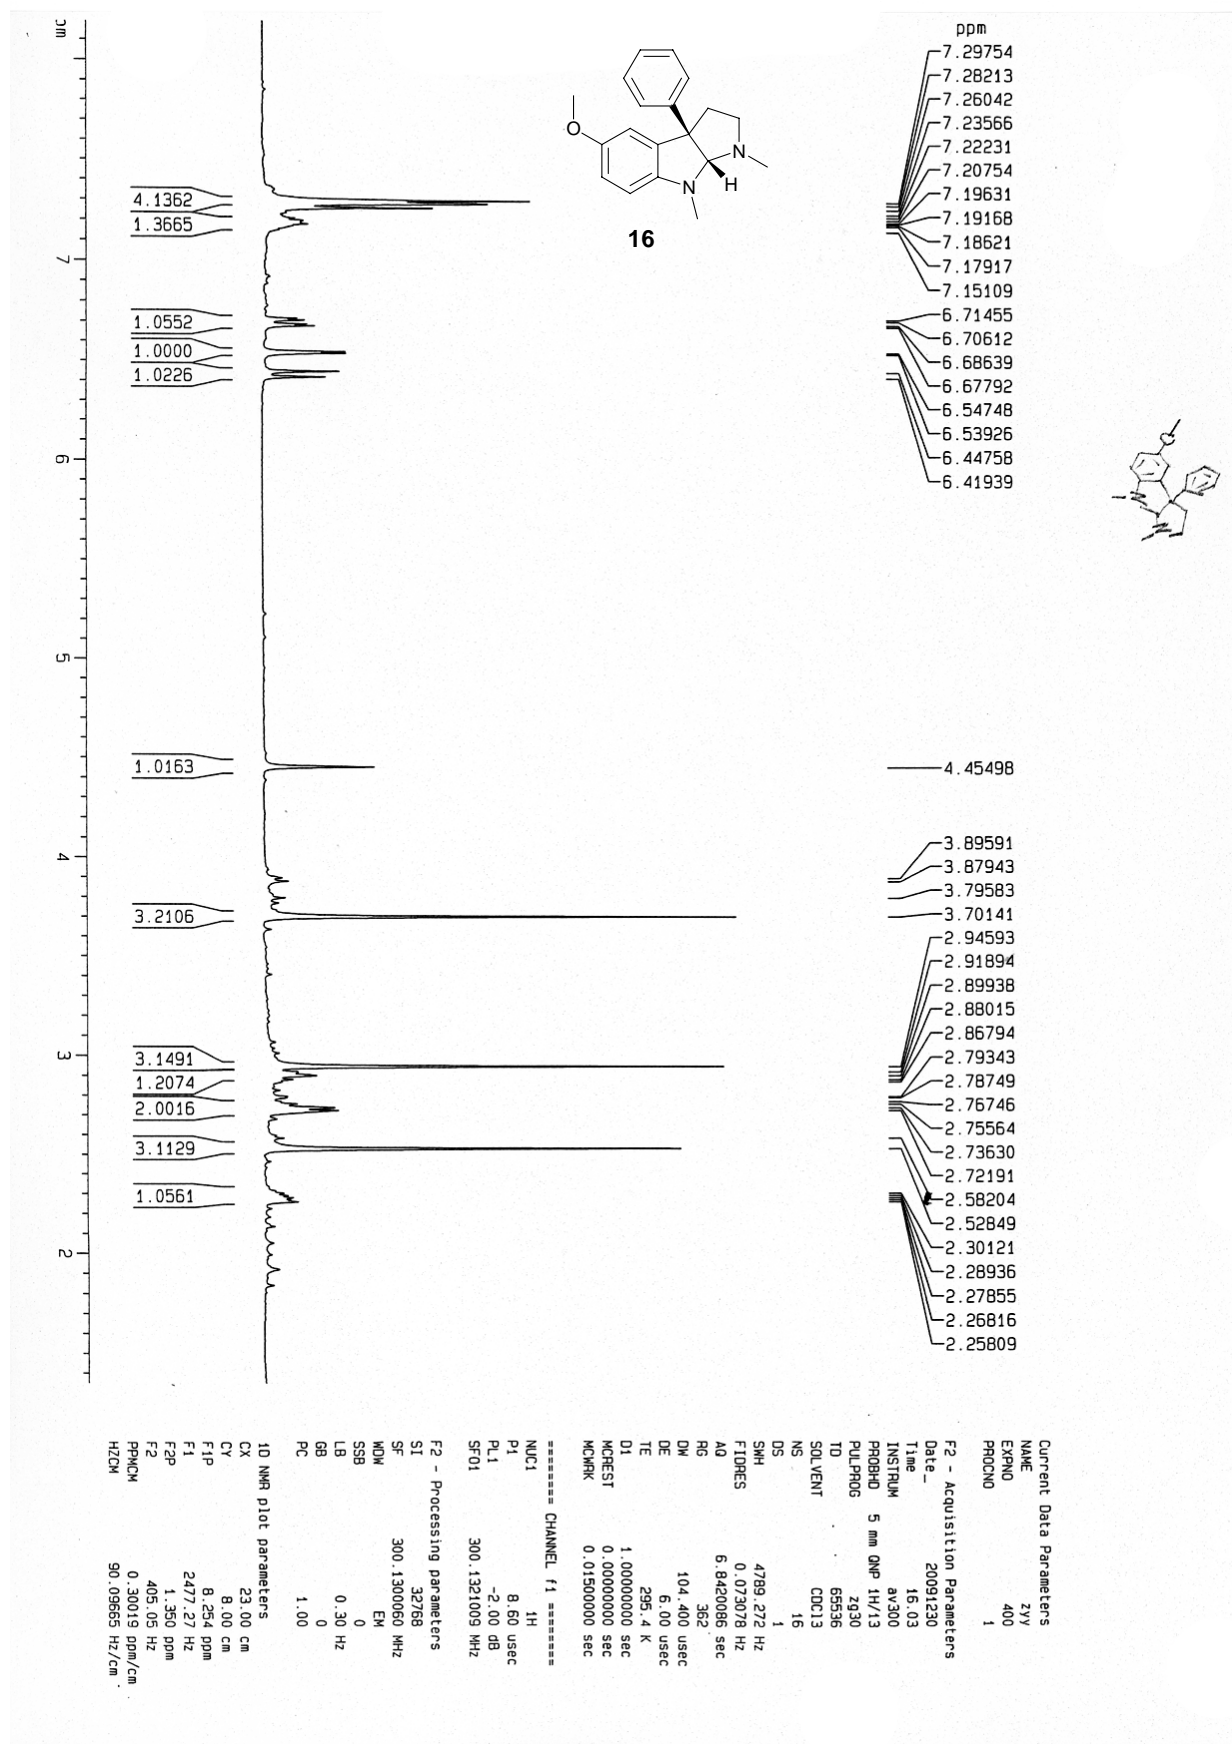



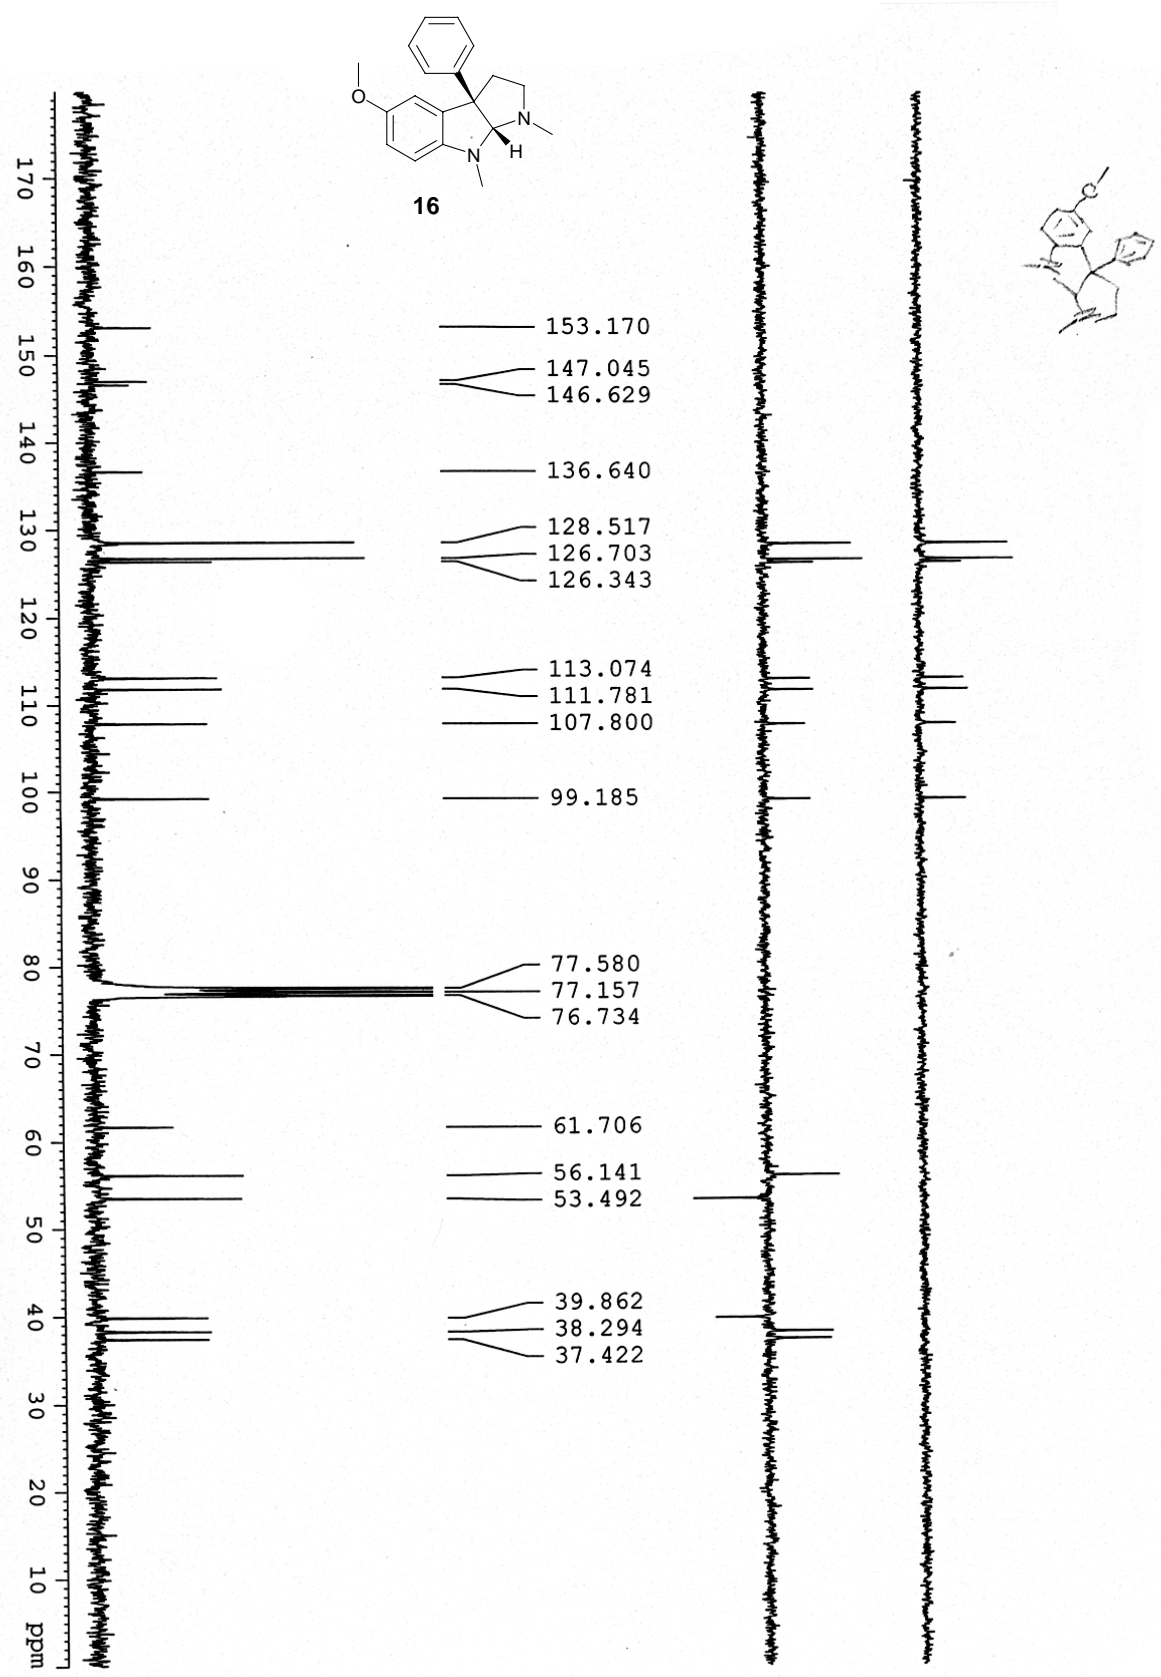

Supplement: c1ob05275f.pdf [file c1ob05275f.pdf]
